# 1 **BNT162b vaccines are immunogenic and protect non-human primates** 2 **against SARS-CoV-2**

3

## 4 **Authors**

5 Annette B. Vogel<sup>1#</sup>, Isis Kanevsky<sup>2#</sup>, Ye Che<sup>3#</sup>, Kena A. Swanson<sup>2</sup>, Alexander Muik<sup>1</sup>, Mathias  
6 Vormehr<sup>1</sup>, Lena M. Kranz<sup>1</sup>, Kerstin C. Walzer<sup>1</sup>, Stephanie Hein<sup>1</sup>, Alptekin Güler<sup>1</sup>, Jakob  
7 Loschko<sup>2</sup>, Mohan S. Maddur<sup>2</sup>, Ayuko Ota-Setlik<sup>2</sup>, Kristin Tompkins<sup>2</sup>, Journey Cole<sup>4</sup>, Bonny  
8 G. Lui<sup>1</sup>, Thomas Ziegenhals<sup>1</sup>, Arianne Plaschke<sup>1</sup>, David Eisel<sup>1</sup>, Sarah C. Dany<sup>1</sup>, Stephanie  
9 Fesser<sup>1</sup>, Stephanie Erbar<sup>1</sup>, Ferdia Bates<sup>1</sup>, Diana Schneider<sup>1</sup>, Bernadette Jesionek<sup>1</sup>, Bianca  
10 Sängner<sup>1</sup>, Ann-Kathrin Wallisch<sup>1</sup>, Yvonne Feuchter<sup>1</sup>, Hanna Junginger<sup>1</sup>, Stefanie A. Krumm<sup>1</sup>,  
11 André P. Heinen<sup>1</sup>, Petra Adams-Quack<sup>1</sup>, Julia Schlereth<sup>1</sup>, Stefan Schille<sup>1</sup>, Christoph Kröner<sup>1</sup>,  
12 Ramón de la Caridad Güimil Garcia<sup>1</sup>, Thomas Hiller<sup>1</sup>, Leyla Fischer<sup>1</sup>, Rani S. Sellers<sup>2</sup>,  
13 Shambhunath Choudhary<sup>2</sup>, Olga Gonzalez<sup>4</sup>, Fulvia Vascotto<sup>7</sup>, Matthew R. Gutman<sup>8</sup>, Jane A.  
14 Fontenot<sup>9</sup>, Shannan Hall-Ursone<sup>4</sup>, Kathleen Brasky<sup>4</sup>, Matthew C. Griffor<sup>3</sup>, Seungil Han<sup>3</sup>,  
15 Andreas A.H. Su<sup>1</sup>, Joshua A. Lees<sup>3</sup>, Nicole L. Nedoma<sup>3</sup>, Ellene H. Mashalidis<sup>3</sup>, Parag V.  
16 Sahasrabudhe<sup>3</sup>, Charles Y. Tan<sup>2</sup>, Danka Pavliakova<sup>2</sup>, Guy Singh<sup>2</sup>, Camila Fontes-Garfias<sup>5</sup>,  
17 Michael Pride<sup>2</sup>, Ingrid L. Scully<sup>2</sup>, Tara Ciolino<sup>2</sup>, Jennifer Obregon<sup>2</sup>, Michal Gazi<sup>6</sup>, Ricardo  
18 Carrion, Jr.<sup>4</sup>, Kendra J. Alfson<sup>6</sup>, Warren V. Kalina<sup>2</sup>, Deepak Kaushal<sup>4</sup>, Pei-Yong Shi<sup>5</sup>, Thorsten  
19 Klamp<sup>1</sup>, Corinna Rosenbaum<sup>1</sup>, Andreas N. Kuhn<sup>1</sup>, Özlem Türeci<sup>1</sup>, Philip R. Dormitzer<sup>2</sup>,  
20 Kathrin U. Jansen<sup>2</sup>, Ugur Sahin<sup>1,7</sup>

21

22 # Contributed equally

23

## 24 **Affiliations:**

25 <sup>1</sup> BioNTech, An der Goldgrube 12, 55131 Mainz, Germany;

26 <sup>2</sup> Pfizer, 401 N. Middletown Rd., Pearl River, NY 10965, United States;

27 <sup>3</sup> Pfizer, 280 Shennecossett Rd., Groton, CT 06340, United States;

28 <sup>4</sup> Southwest National Primate Research Center, Texas Biomedical Research Institute, 8715 W.  
29 Military Dr, San Antonio, TX 78227, United States;

30 <sup>5</sup> University of Texas Medical Branch, 301 University Blvd, Galveston, TX 77555, United  
31 States;

32 <sup>6</sup> Texas Biomedical Research Institute, 8715 W Military Dr, San Antonio, TX 78227, United  
33 States;

34 <sup>7</sup> TRON gGmbH – Translational Oncology at the University Medical Centre of the Johannes  
35 Gutenberg University, Freiligrathstraße 12, 55131 Mainz, Germany;

36 <sup>8</sup> VCA SouthPaws Veterinary Specialists and Emergency Center, 8500 Arlington Blvd.,  
37 Fairfax, VA 22031, USA;

38 <sup>9</sup> New Iberia Research Center, 4401 West Admiral Doyle Drive, New Iberia, LA, 70560, USA

39

40

## 41 **Correspondence:**

42 Prof. Dr. Ugur Sahin

43 BioNTech SE, An der Goldgrube 12, 55131 Mainz, Germany

44 Tel: +49 6131 2161 201

45 Mail: Ugur.Sahin@biontech.de

## 46 **Abstract**

47 A safe and effective vaccine against COVID-19 is urgently needed in quantities sufficient to  
48 immunise large populations. We report the preclinical development of two BNT162b vaccine  
49 candidates, which contain lipid-nanoparticle (LNP) formulated nucleoside-modified mRNA  
50 encoding SARS-CoV-2 spike glycoprotein-derived immunogens. BNT162b1 encodes a  
51 soluble, secreted, trimerised receptor-binding domain (RBD-foldon). BNT162b2 encodes the  
52 full-length transmembrane spike glycoprotein, locked in its prefusion conformation (P2 S). The  
53 flexibly tethered RBDs of the RBD-foldon bind ACE2 with high avidity. Approximately 20%  
54 of the P 2S trimers are in the two-RBD ‘down,’ one-RBD ‘up’ state. In mice, one intramuscular  
55 dose of either candidate elicits a dose-dependent antibody response with high virus-entry  
56 inhibition titres and strong  $T_H1$   $CD4^+$  and  $IFN\gamma^+$   $CD8^+$  T-cell responses. Prime/boost  
57 vaccination of rhesus macaques with BNT162b candidates elicits SARS-CoV-2 neutralising  
58 geometric mean titres 8.2 to 18.2 times that of a SARS-CoV-2 convalescent human serum  
59 panel. The vaccine candidates protect macaques from SARS-CoV-2 challenge, with BNT162b2  
60 protecting the lower respiratory tract from the presence of viral RNA and with no evidence of  
61 disease enhancement. Both candidates are being evaluated in phase 1 trials in Germany and the  
62 United States. BNT162b2 is being evaluated in an ongoing global, pivotal Phase 2/3 trial  
63 (NCT04380701, NCT04368728).

## 64 **Main**

### 65 **Introduction**

66 Due to the shattering impact of the coronavirus disease 2019 (COVID-19) pandemic on human  
67 health and society, multiple collaborative research programs have been launched, generating  
68 new insights and progress in vaccine development. Soon after emerging in December 2019, the  
69 severe acute respiratory syndrome coronavirus-2 (SARS-CoV-2) was identified as a  $\beta$ -  
70 coronavirus with high sequence similarity to bat-derived SARS-like coronaviruses<sup>1,2</sup>. Fast  
71 pandemic vaccine availability is critical, and the rapid globalised response is mirrored by the  
72 upload of over 212,000 viral genome sequences as of November 23, 2020, to GISAID (Global  
73 Initiative on Sharing All Influenza Data).

74 The trimeric spike glycoprotein (S) of SARS-CoV-2 is a key target for virus neutralising  
75 antibodies<sup>3</sup> and the prime candidate for vaccine development. S binds its cellular receptor,  
76 angiotensin converting enzyme 2 (ACE2), through a receptor-binding domain (RBD), which is  
77 part of S1, its N-terminal furin cleavage fragment<sup>4,5</sup>. On S, the RBDs have 'up' positions, in  
78 which the receptor binding sites and their dense cluster of neutralising epitopes are exposed,  
79 and 'down' positions, in which the receptor binding sites are buried, but some S neutralising  
80 epitopes on and off the RBDs remain available<sup>6-9</sup>. S rearranges to translocate the virus into cells  
81 by membrane fusion<sup>6,10</sup>. The C-terminal furin cleavage fragment, S2, contains the fusion  
82 machinery<sup>11</sup>.

83 Messenger RNA technology allows versatile vaccine antigen design and highly scalable, fast  
84 manufacturing. With efficient lipid-nanoparticle (LNP) formulation processes, RNA vaccines  
85 are highly suited to rapid development and pandemic supply<sup>12,13</sup>. RNA generated from DNA  
86 templates by a highly productive, cell-free *in vitro* transcription process is molecularly well  
87 defined and free of animal-origin materials. Here, we report the preclinical development of the  
88 LNP formulated N<sup>1</sup>-methyl-pseudouridine (m<sup>1</sup>Ψ) nucleoside-modified mRNA (modRNA)  
89 BNT162b vaccine candidates that encode SARS-CoV-2 S-derived immunogens (Fig. 1a). The  
90 m<sup>1</sup>Ψ-modification dampens innate immune sensing and, together with optimised non-coding  
91 sequence elements, increases efficiency of RNA translation *in vivo*<sup>13-15</sup>. Vaccines based on  
92 modRNA have proven immunogenic for several viral targets<sup>16,17</sup>.

93 Both BNT162b vaccines are being evaluated in phase 1 clinical trials in the US (NCT04368728)  
94 and Germany (NCT04380701, EudraCT: 2020-001038-36); BNT162b2 is being evaluated in a  
95 pivotal, global, phase 2/3 safety and efficacy study<sup>18-20</sup>.

## 96 **Results**

97 BNT162b1 RNA encodes the RBD with the SARS-CoV-2 S signal peptide (SP) fused to its N-  
98 terminus to enable ER translocation and secretion and with the trimerisation domain (foldon)  
99 of T4 fibrin<sup>21</sup> fused to its C-terminus for multimeric display; BNT162b2 RNA encodes full-  
100 length S, stabilised in the prefusion conformation by the mutation of residues 986 and 987 to  
101 proline (P2 S; Fig. 1a)<sup>7,22,23</sup>. Both RNAs have single, sharp microfluidic capillary  
102 electrophoresis profiles, consistent with their calculated lengths, indicating high purity and  
103 integrity (Fig. 1b). Robust expression of RBD-foldon or P2 S was detectable by flow cytometry  
104 upon transfection of HEK293T cells with BNT162b1 RNA or BNT162b2 RNA, respectively,  
105 formulated as LNPs or mixed with a transfection reagent (Extended Data Fig. 1a). In transfected  
106 cells, BNT162b1-encoded RBD and BNT162b2-encoded P2 S localised to the secretory  
107 pathway as shown by immunofluorescence microscopy (Extended Data Fig. 1b). A main band  
108 of RBD-containing protein with an apparent MW >75 kDa was detected in the medium of  
109 BNT162b1 RNA-transfected cells (together with lesser quantities of a faster migrating species)  
110 by western blot under denaturing and non-denaturing conditions, consistent with secretion of  
111 trimeric RBD-foldon (predicted MW 88.4 kD; Extended Data Fig. 1c).

112 For further structural characterisation, the RBD-foldon and P2 S antigens were expressed from  
113 DNA corresponding to the RNA coding sequences. The RBD-foldon was purified from the  
114 medium of transfected Expi293F cells by affinity capture with the ACE2-peptidase domain  
115 (PD) immobilised on agarose beads, leaving little residual RBD-foldon uncaptured from the  
116 medium. Evidence that the RBD-foldon has three RBDs flexibly tethered to a central hub was  
117 obtained by electron microscopy (EM), which revealed a variety of conformations (Fig. 1c).  
118 The trimerised RBD bound to the human ACE2 peptidase domain (PD) with a  $K_D$  of <5 pM,  
119 which is 1,000-fold the reported  $K_D$  of 5 nM for monomeric RBD and consistent with the avidity  
120 effect of multivalent binding enabled by the flexible tethering (Extended Data Fig. 1d).  
121 Although the flexibility of the RBD-foldon precluded direct structural analysis at high  
122 resolution, one RBD per trimer could be immobilised by binding to a complex of ACE2 and  
123 the B<sup>0</sup>AT1 neutral amino acid transporter, which ACE2 chaperones, when that complex was in  
124 the previously reported closed conformation (Fig. 1d)<sup>5</sup>. The size and symmetry of the RBD-

125 foldon/ACE2/B<sup>0</sup>AT1 ternary complex aided image reconstruction by electron cryomicroscopy  
126 (cryo-EM), and the structure of the RBD in the complex was determined to 3.24 Å resolution  
127 (Fig. 1e, Extended Data Table 1 and Supplementary Fig. 2). One copy of the RBD was resolved  
128 for each bound trimer. The binding interface between the resolved RBD and the ACE2  
129 extracellular domain was fitted to a previously reported structure and showed good agreement<sup>4</sup>.  
130 The high avidity binding to ACE2 and well-resolved structure in complex with ACE2  
131 demonstrate that the recombinant RBD-foldon authentically presents the ACE2 binding site  
132 targeted by many SARS-CoV-2 neutralising antibodies<sup>8,24</sup>.

133 The trimeric P2 S was affinity purified from detergent solubilised protein via the C-terminal  
134 TwinStrep tag. P2 S bound the human ACE2-PD and a human anti-RBD neutralising antibody  
135 B38 with high affinity ( $K_D$  1 nM for each, Extended Data Fig. 1e, f)<sup>25</sup>. Structural analysis by  
136 cryo-EM produced a 3.29 Å nominal resolution mass density map, into which a previously  
137 published atomic model<sup>7</sup> was fitted and rebuilt (Fig. 1f; Extended Data Fig. 2a, b and Table 1).  
138 The rebuilt model showed good agreement with reported structures of prefusion full-length wild  
139 type S and its ectodomain with P2 mutations<sup>6,7</sup>. Three-dimensional classification of the dataset  
140 showed a class of particles that was in the one RBD ‘up’ (accessible for receptor binding), two  
141 RBD ‘down’ (closed) conformation and represented 20.4% of the trimeric molecules (Fig. 1g,  
142 Extended Data Fig. 2c). The remainder were in the all RBD ‘down’ conformation. The RBD in  
143 the ‘up’ conformation was less well resolved than other parts of the structure, suggesting  
144 conformational flexibility and a dynamic equilibrium between RBD ‘up’ and RBD ‘down’  
145 states, as also suggested by others<sup>6,26</sup>. The binding and structural analyses indicate that the  
146 BNT162b2 RNA sequence encodes a recombinant P2 S that can authentically present the ACE2  
147 binding site and other epitopes targeted by SARS-CoV-2 neutralising antibodies.

148 To study vaccine immunogenicity, B- and T-cell responses were characterised in a series of  
149 experiments in BALB/c mice after a single intramuscular (IM) immunisation with 0.2, 1, or  
150 5 µg of BNT162b vaccines, or buffer control. One immunisation with either candidate induced  
151 high dose level-dependent RBD- and S1-binding serum IgG titres (Fig. 2a, b; Extended Data  
152 Fig. 3a-c), which increased more steeply for BNT162b2. On day 28 after one immunisation  
153 with 5 µg BNT162b1 or BNT162b2, RBD-binding geometric mean endpoint titres were  
154 752,680 or 434,560, respectively. IgG elicited by either candidate had strong binding affinity  
155 for a recombinant RBD target antigen (geometric mean  $K_D$  717 pM for BNT162b1 and 993 pM  
156 for BNT162b2), with a low off-rate and a high on-rate (Fig. 2c). Serum samples from buffer-

157 immunised control animals had no detectable RBD- or S1-specific IgG (Fig. 2a, b and Extended  
158 Data Fig. 3a-c), and neither did serum samples from animals immunised up to two times with  
159 equivalent LNP-formulated modRNA that encoded a SARS-CoV-2 irrelevant antigen (not  
160 shown).

161 Virus entry inhibition by BNT162b immunised mouse serum was measured with a vesicular  
162 stomatitis virus (VSV)-based SARS-CoV-2 pseudovirus neutralisation assay. Like the antigen-  
163 specific IgG geometric mean titres (GMTs), fifty percent pseudovirus neutralisation (pVNT<sub>50</sub>)  
164 GMTs increased steadily after immunisation with 5 µg of either candidate, reaching 1,056 for  
165 BNT162b1 and 296 for BNT162b2 on Day 28 after immunisation (Fig. 2d, Extended Data Fig.  
166 3e, f). A random selection of samples was tested in a SARS-CoV-2 virus neutralisation assay,  
167 demonstrating strong correlation of pseudovirus and SARS-CoV-2 neutralisation (Pearson  
168 correlation of 0.9479 between the tests (Extended Data Fig. 3g). In summary, each candidate  
169 induced a high functional antibody response in mice, with BNT162b1 inducing higher titres  
170 after one immunisation.

171 Characterisation of antigen-specific splenic T-cell responses in mice 12 and 28 days after  
172 BNT162b vaccine immunisation revealed a high fraction of CD4<sup>+</sup> and CD8<sup>+</sup> T cells that  
173 produced IFN $\gamma$  and CD8<sup>+</sup> cells that produced IL-2, as shown by enzyme linked immunospot  
174 assay (ELISpot) or intracellular cytokine staining (ICS) flow cytometry analysis after *ex vivo*  
175 restimulation with a full-length S peptide pool (Fig. 3a-c). Total splenocytes harvested on Day  
176 28 and re-stimulated with the full-length S peptide pool secreted high levels of the T<sub>H</sub>1  
177 cytokines IL-2 or IFN $\gamma$  and minute or undetectable levels of the T<sub>H</sub>2 cytokines IL-4, IL-5 or IL-  
178 13, as measured in multiplex immunoassays (Fig. 3d). Overall, the patterns of CD4<sup>+</sup> and CD8<sup>+</sup>  
179 T-cell responses were similar for the two vaccine candidates, with a somewhat stronger IFN $\gamma$ -  
180 producing CD8<sup>+</sup> T-cell response in BNT162b2-immunised mice.

181 Vaccine-induced effects on the proliferation and dynamics of immune cell populations were  
182 assessed in injection site draining lymph nodes (dLNs), to evaluate the principal immune-  
183 educated compartments for proficient T- and B-cell priming, as well as in blood and spleen, to  
184 evaluate systemic vaccine effects. Higher numbers of plasma cells, class switched IgG1- and  
185 IgG2a-positive B cells, and germinal center B cells were observed in dLNs, and higher numbers  
186 of class switched IgG1-positive and germinal centre B cells were observed in spleens of mice  
187 12 days after immunisation with 5 µg of either vaccine as compared to control (Extended Data  
188 Fig. 4a, b). Vaccine-immunised mice had significantly fewer circulating B cells than control



189 mice as measured in blood at Day 7 post-immunisation (Extended Data Fig. 4c), which may  
190 imply that B-cell homing to lymphoid compartments contributed to augmented B-cell counts in  
191 dLN and spleen.

192 The dLNs from BNT162b1- or BNT162b2-immunised mice also displayed significantly  
193 elevated counts of CD8<sup>+</sup> and CD4<sup>+</sup> T cells, which were most pronounced for T follicular helper  
194 (T<sub>FH</sub>) cells, including ICOS<sup>+</sup> subsets that are essential for germinal centre formation (Extended  
195 Data Fig. 4a). Both BNT162b vaccines increased T<sub>FH</sub> cell counts in the spleen and blood, while  
196 an increase in circulating CD8<sup>+</sup> T cells was only detected in BNT162b2-immunised mice  
197 (Extended Data Fig. 4b, c). In aggregate, these data indicate a strong induction of SARS-CoV-  
198 2 pseudovirus neutralisation titres and systemic CD8<sup>+</sup> and T<sub>H</sub>1-driven CD4<sup>+</sup> T-cell responses  
199 by both modRNA vaccine candidates, with a somewhat more pronounced cellular response to  
200 BNT162b2.

201 To assess the immunogenicity of BNT162b1 and BNT162b2 in non-human primates, groups  
202 of six male, 2-4 year old rhesus macaques were immunised IM with 30 or 100 µg of BNT162b1,  
203 BNT162b2, or saline control on Days 0 and 21. RBD-binding IgG was readily detectable by  
204 Day 14 after Dose 1, and levels increased further 7 days after Dose 2 (Day 28; Fig. 4a). On Day  
205 28, geometric mean RBD-binding IgG concentrations (GMCs) were 20,962 units (U)/mL (30  
206 µg dose level) and 48,575 U/mL (100 µg dose level) for BNT162b1 and 23,781 U/mL (30 µg  
207 dose level) and 26,170 U/mL (100 µg dose level) for BNT162b2. For comparison, the RBD-  
208 binding IgG GMC of a panel of 38 SARS-CoV-2 convalescent human sera (HCS) was 602  
209 U/mL, lower than the GMC of immunised rhesus macaques after one or two doses.

210 Fifty percent virus neutralisation GMTs, measured by a SARS-CoV-2 neutralisation assay<sup>27</sup>  
211 (not a pseudovirus neutralisation assay), were detectable in the sera of most BNT162b1-  
212 immunised rhesus macaques by Day 21 after Dose 1 and in all BNT162b2-immunised  
213 macaques by Day 14 after Dose 1 (Fig. 4b). There was a strong boosting effect, with comparable  
214 GMTs elicited by BNT162b1 (768 for 30 µg and 1,714 for 100 µg) or BNT162b2 (962 for 30  
215 µg or 1,689 for 100 µg), measured in sera drawn 7 or 14 days after Dose 2. For BNT162b2,  
216 sera were available up to Day 56 after Dose 1 (28 days after Dose 2), and robust GMTs of 285  
217 for 30 µg and 283 for 100 µg dose levels persisted to that time point. For comparison, the  
218 neutralisation GMT of the human convalescent serum was 94, substantially lower than the  
219 GMTs of rhesus macaque sera drawn 21 or 35 days after Dose 2.

220 S-specific T-cell responses of the BNT162b2- or saline-immunised rhesus macaques were  
221 analysed using peripheral blood mononuclear cells (PBMCs) collected before immunisation  
222 and at the times indicated after Doses 1 and 2. ELISpot demonstrated strong IFN $\gamma$  but minimal  
223 IL-4 responses after Dose 2 (Fig. 4c, d, and Extended Data Fig. 5). ICS confirmed that  
224 BNT162b2 elicited a high frequency of CD4<sup>+</sup> T cells that produced IFN $\gamma$ , IL-2, or TNF but a  
225 low frequency of CD4<sup>+</sup> T cells that produced IL-4, indicating a T<sub>H</sub>1-biased response (Fig. 4e,  
226 f). ICS also demonstrated that BNT162b2 elicited circulating S-specific CD8<sup>+</sup> T cells that  
227 produced IFN $\gamma$  (Fig. 4g).

228 Forty-one to fifty-five days after Dose 2, 6 of the 2-4 year old rhesus macaques that had been  
229 immunised with 100  $\mu$ g BNT162b1 and 6 that had been immunised with 100  $\mu$ g BNT162b2  
230 were challenged with  $1.05 \times 10^6$  plaque forming units of SARS-CoV-2 (strain USA-  
231 WA1/2020), split equally between intranasal and intratracheal routes, as previously described  
232 (Extended Data Fig. 6, Extended Data Table 2)<sup>28</sup>. In addition, nine age-matched macaques  
233 (controls) that had been mock-immunised with saline received the same SARS-CoV-2  
234 challenge, and 6 age-matched macaques (sentinels), 3 of which had been immunised with 30  
235  $\mu$ g BNT162b2, were mock-challenged with cell culture medium. Nasal, oropharyngeal (OP),  
236 and rectal swabs were collected, and bronchoalveolar lavage (BAL) was performed at the times  
237 indicated (Extended Data Table 2). Samples were tested for SARS-CoV-2 RNA (genomic RNA  
238 and subgenomic transcripts) by reverse-transcription quantitative polymerase chain reaction  
239 (RT-qPCR; Fig. 5a,b). All personnel performing clinical, radiological, histopathological, or  
240 RT-qPCR evaluations were blinded to the group assignments of the macaques.

241 Viral RNA was detected in BAL fluid from 7 of the 9 control macaques on Day 3, from 4 of 8  
242 on Day 6 after challenge (with 1 indeterminate result), and from none of the 6 that underwent  
243 BAL at the end of project (EOP, Days 7-23 after challenge; Fig. 5a). Viral RNA was detected  
244 in the BAL fluid of 2 of 6 BNT162b1-immunised macaques on day 3 after challenge and from  
245 none thereafter. At no time point sampled was viral RNA detected in BAL fluid from the  
246 BNT162b2-immunised and SARS-CoV-2 challenged macaques.

247 In nasal swabs obtained on the day after challenge, viral RNA was detected from control-  
248 immunised macaques (4 of 9) and BNT162b2-immunised macaques (5 of 6) but not from  
249 BNT162b1-immunised macaques (Fig. 5b). In subsequent nasal swabs, viral RNA was detected  
250 from some of the control-immunised macaques on each sampling (5 of 9 on Day 3, 4 of 9 on  
251 Day 6, and 2 of 9 on Days 7-23), from some BNT162b1-immunised macaques on only 1



252 sampling (2 of 6 on Day 6), and from none of the BNT162b2-immunised macaques on any  
253 sampling. Similar patterns were seen in OP and rectal swabs, with viral RNA more often  
254 detected in control-immunised macaques than in BNT162b1- or BNT162b2-immunised  
255 macaques and with more persistence of viral RNA in rectal swabs than in OP swabs (Extended  
256 Data Fig. 7a, b).

257 At the time of challenge, SARS-CoV-2 neutralising titres ranged from 208 to 1,185 in the  
258 BNT162b1-immunised animals and from 260 to 1,004 in the BNT162b2-immunised animals.  
259 Neutralising titres were below the limit of detection in the control animals (Fig. 5c, d). The  
260 control animals responded to infectious virus challenge with an increase in SARS-CoV-2  
261 neutralising titres, consistent with an immune response to viral infection. However, there was  
262 no trend toward increasing SARS-CoV-2 neutralising titres in response to viral challenge in the  
263 BNT162b1-immunised or BNT162b2-immunised animals, consistent with immunisation  
264 suppressing SARS-CoV-2 infection. The maximum SARS-CoV-2 neutralising titre elicited by  
265 virus challenge of control rhesus macaques remained below 150 through the time of necropsy,  
266 whereas all immunised animals maintained neutralising titres greater than 150 throughout the  
267 challenge experiment.

268 None of the challenged animals, whether immunised or not, showed clinical signs of illness  
269 (Extended Data Fig. 8a-d). Radiographic abnormalities were generally minimal or mild and  
270 were not consistently associated with viral challenge (Extended Data Fig. 9a, b).  
271 Histopathology of necropsy specimens obtained 7-8 days after challenge revealed localised  
272 areas of pulmonary inflammation that were limited in extent even in the control animals  
273 challenged after mock immunisation with saline (Extended Data Fig. 10). We conclude that the  
274 2-4 year old male rhesus macaque challenge model is primarily a SARS-CoV-2 infection model  
275 rather than a COVID-19 disease model.

## 276 **Discussion**

277 We demonstrate that BNT162b1 or BNT162b2, LNP-formulated, m1 $\Psi$  nucleoside-modified  
278 mRNAs that encode secreted, trimerised SARS-CoV-2 RBD or prefusion-stabilised S,  
279 respectively, induce strong antigen-specific immune responses in mice and rhesus macaques.  
280 The RBD-foldon coding sequence directs the expression and secretion of a flexible, trimeric  
281 protein that binds ACE2 with high affinity and has structurally intact ACE2 receptor binding  
282 sites. Protein expressed from DNA with the BNT162b2-encoded P2 S amino acid sequence was

283 confirmed to be in the prefusion conformation by cryo-EM. This analysis showed that the  
284 antigenically important RBD can assume the ‘up’ conformation, with the receptor binding site,  
285 rich in neutralising epitopes, accessible in a proportion of the molecules<sup>24</sup>. The alternative states  
286 observed likely reflect a dynamic equilibrium between RBD ‘up’ and ‘down’ positions<sup>7,26</sup>.  
287 Binding of expressed and purified P2 S to ACE2 and a neutralising monoclonal antibody further  
288 demonstrates its conformational and antigenic integrity.

289 In mice, a single sub-microgram immunisation with either BNT162b candidate rapidly induced  
290 high antibody titres that inhibited pseudovirus entry in the range of or above recently reported  
291 neutralising titres elicited by other SARS-CoV-2 vaccine candidates<sup>29,30</sup>. The candidates also  
292 induced strong T<sub>FH</sub> and T<sub>H1</sub> type CD4<sup>+</sup> T-cell responses, the latter thought to be a more general  
293 effect of LNP-formulated modRNA vaccines against SARS-CoV-2<sup>31</sup>. Both CD4<sup>+</sup> T-cell types  
294 are known to support antigen-specific antibody generation and maturation. In some animal  
295 models of respiratory virus infection, a T<sub>H2</sub> type CD4<sup>+</sup> T-cell response has been associated with  
296 vaccine-associated enhanced respiratory disease<sup>32,33</sup>. Therefore, a T<sub>H1</sub> type response to  
297 immunisation is preferred, as it may reduce the theoretical risk of enhanced pulmonary disease  
298 during subsequent viral infection. Immunisation with the vaccine candidates triggered  
299 redistribution of B cells from the blood to lymphoid tissues, where antigen presentation occurs.  
300 In humans, T<sub>FH</sub> cells in the circulation after vaccination with a VSV-vectored Ebola vaccine  
301 candidate have been correlated with a high frequency of antigen-specific antibodies<sup>34</sup>. After  
302 vaccination of mice with BNT162b1 or BNT162b2, high numbers of T<sub>FH</sub> were present in both  
303 blood and LN, a potential correlate for the generation of a strong adaptive B-cell response in  
304 germinal centres. In addition to eliciting favourable CD4<sup>+</sup> T-cell responses, both BNT162b1  
305 and BNT162b2 elicit CD8<sup>+</sup> T-cell responses in mice, with BNT162b2 appearing to be  
306 somewhat more efficient at eliciting antigen-specific cytotoxic IFN $\gamma$  CD8<sup>+</sup> T cells.

307 BNT162b1 and BNT162b2 elicit immune profiles in rhesus macaques similar to those observed  
308 in mice. Seven days after Dose 2 of 100  $\mu$ g administered to macaques, during the expansion  
309 phase of the antibody response, neutralising GMTs elicited by either candidate reached  
310 approximately 18-times the GMT of a human SARS-CoV-2 convalescent serum panel.  
311 Neutralising GMTs declined by Day 56 (35 days after Dose 2), consistent with the contraction  
312 phase, but remained well above the GMT of the panel. The duration of the study was not long  
313 enough to assess the rate of decline during the plateau phase of the antibody response. As it

314 had in mice, BNT162b2 elicited a strongly  $T_H1$ -biased  $CD4^+$  T-cell response and  $IFN\gamma^+$   $CD8^+$   
315 T-cell response in rhesus macaques.

316 Limitation and clearance of virus infections is promoted by the interplay of neutralising  
317 antibodies that eliminate infectious particles with  $CD8^+$  T cells that target intracellular virus  
318 reservoirs.  $CD8^+$  T cells may also reduce the influx of monocytes into infected lung tissue,  
319 which can be associated with undesirable IL-6 and TNF production and impaired antigen  
320 presentation<sup>35,36</sup>. The responses elicited by the vaccine candidates reflect a pattern favourable  
321 for vaccine safety and efficacy, providing added reassurance for clinical translation<sup>37</sup>. The  
322 contributions of the individual immune effector systems to human protection from SARS-CoV-  
323 2 are not yet understood. Therefore, it appears prudent to develop COVID-19 vaccines that  
324 enlist concomitant cognate B cells,  $CD4^+$  T cells, and  $CD8^+$  T-cell responses.

325 Both candidates protected 2-4 year old rhesus macaques from infectious SARS-CoV-2  
326 challenge, with reduced detection of viral RNA in immunised animals compared to those that  
327 received saline. Immunisation with BNT162b2 provided particularly strong RT-qPCR evidence  
328 for lower respiratory tract protection, as demonstrated by the absence of detectable SARS-CoV-  
329 2 RNA in serial BAL samples obtained starting 3 days after challenge. The lack of serological  
330 response to the SARS-CoV-2 challenge in BNT162b1- or BNT162b2-immunised macaques,  
331 despite a neutralising response to challenge in control-immunised macaques, suggests  
332 suppression of infection by the vaccine candidates. Clinical signs of disease were absent, and  
333 radiological and pathological abnormalities were generally mild after challenge. There was no  
334 evidence of vaccine-mediated enhancement of viral replication, disease, or pathology.

335 The selection of BNT162b2 over BNT162b1 for further clinical testing was largely driven by  
336 greater tolerability of BNT162b2 with comparable immunogenicity in clinical trials<sup>20</sup> and the  
337 broader range and MHC-diversity of T-cell epitopes on the much larger full-length spike. A  
338 global, pivotal, phase 3 safety and efficacy study of immunisation with BNT162b2  
339 (NCT04368728) is ongoing and may answer those open questions that cannot be addressed by  
340 preclinical models.

## 341 **References**

- 342 1. Zhou, P. *et al.* A pneumonia outbreak associated with a new coronavirus of probable bat  
343 origin. *Nature* **579**, 270–273; 10.1038/s41586-020-2012-7 (2020).
- 344 2. Zhu, N. *et al.* A Novel Coronavirus from Patients with Pneumonia in China, 2019. *The New*  
345 *England journal of medicine* **382**, 727–733; 10.1056/NEJMoa2001017 (2020).
- 346 3. He, Y. *et al.* Receptor-binding domain of SARS-CoV spike protein induces highly potent  
347 neutralizing antibodies: implication for developing subunit vaccine. *Biochemical and*  
348 *Biophysical Research Communications* **324**, 773–781; 10.1016/j.bbrc.2004.09.106 (2004).
- 349 4. Yi, C. *et al.* Key residues of the receptor binding motif in the spike protein of SARS-CoV-  
350 2 that interact with ACE2 and neutralizing antibodies. *Cellular & molecular immunology*;  
351 10.1038/s41423-020-0458-z (2020).
- 352 5. Yan, R. *et al.* Structural basis for the recognition of SARS-CoV-2 by full-length human  
353 ACE2. *Science (New York, N.Y.)* **367**, 1444–1448; 10.1126/science.abb2762 (2020).
- 354 6. Cai, Y. *et al.* Distinct conformational states of SARS-CoV-2 spike protein. *Science (New*  
355 *York, N.Y.)*; 10.1126/science.abd4251 (2020).
- 356 7. Wrapp, D. *et al.* Cryo-EM structure of the 2019-nCoV spike in the prefusion conformation.  
357 *Science (New York, N.Y.)* **367**, 1260–1263; 10.1126/science.abb2507 (2020).
- 358 8. Brouwer, P. J. M. *et al.* Potent neutralizing antibodies from COVID-19 patients define  
359 multiple targets of vulnerability. *Science (New York, N.Y.)*; 10.1126/science.abc5902  
360 (2020).
- 361 9. Chi, X. *et al.* A neutralizing human antibody binds to the N-terminal domain of the Spike  
362 protein of SARS-CoV-2. *Science (New York, N.Y.)*; 10.1126/science.abc6952 (2020).
- 363 10. Ou, X. *et al.* Characterization of spike glycoprotein of SARS-CoV-2 on virus entry and its  
364 immune cross-reactivity with SARS-CoV. *Nature communications* **11**, 1620;  
365 10.1038/s41467-020-15562-9 (2020).
- 366 11. Fan, X., Cao, D., Kong, L. & Zhang, X. Cryo-EM analysis of the post-fusion structure of  
367 the SARS-CoV spike glycoprotein. *Nature communications* **11**, 3618; 10.1038/s41467-020-  
368 17371-6 (2020).

- 369 12. Rauch, S., Jasny, E., Schmidt, K. E. & Petsch, B. New Vaccine Technologies to Combat  
370 Outbreak Situations. *Frontiers in immunology* **9**, 1963; 10.3389/fimmu.2018.01963 (2018).
- 371 13. Pardi, N. *et al.* Expression kinetics of nucleoside-modified mRNA delivered in lipid  
372 nanoparticles to mice by various routes. *Journal of controlled release : official journal of*  
373 *the Controlled Release Society* **217**, 345–351; 10.1016/j.jconrel.2015.08.007 (2015).
- 374 14. Orlandini von Niessen, A. G. *et al.* Improving mRNA-Based Therapeutic Gene Delivery by  
375 Expression-Augmenting 3' UTRs Identified by Cellular Library Screening. *Mol Ther* **27**,  
376 824–836; 10.1016/j.ymthe.2018.12.011 (2019).
- 377 15. Karikó, K. *et al.* Incorporation of pseudouridine into mRNA yields superior  
378 nonimmunogenic vector with increased translational capacity and biological stability.  
379 *Molecular therapy : the journal of the American Society of Gene Therapy* **16**, 1833–1840;  
380 10.1038/mt.2008.200 (2008).
- 381 16. Pardi, N. *et al.* Characterization of HIV-1 Nucleoside-Modified mRNA Vaccines in Rabbits  
382 and Rhesus Macaques. *Molecular therapy. Nucleic acids* **15**, 36–47;  
383 10.1016/j.omtn.2019.03.003 (2019).
- 384 17. Pardi, N. *et al.* Zika virus protection by a single low-dose nucleoside-modified mRNA  
385 vaccination. *Nature* **543**, 248–251; 10.1038/nature21428 (2017).
- 386 18. Sahin, U. *et al.* COVID-19 vaccine BNT162b1 elicits human antibody and TH1 T cell  
387 responses. *Nature*; 10.1038/s41586-020-2814-7 (2020).
- 388 19. Mulligan, M. J. *et al.* Phase 1/2 study of COVID-19 RNA vaccine BNT162b1 in adults.  
389 *Nature*; 10.1038/s41586-020-2639-4 (2020).
- 390 20. Walsh, E. E. *et al.* Safety and Immunogenicity of Two RNA-Based Covid-19 Vaccine  
391 Candidates. *The New England journal of medicine*; 10.1056/NEJMoa2027906 (2020).
- 392 21. Meier, S., Güthe, S., Kiefhaber, T. & Grzesiek, S. Foldon, the natural trimerization domain  
393 of T4 fibritin, dissociates into a monomeric A-state form containing a stable beta-hairpin:  
394 atomic details of trimer dissociation and local beta-hairpin stability from residual dipolar  
395 couplings. *Journal of molecular biology* **344**, 1051–1069; 10.1016/j.jmb.2004.09.079  
396 (2004).

- 397 22. Pallesen, J. *et al.* Immunogenicity and structures of a rationally designed prefusion MERS-  
398 CoV spike antigen. *Proceedings of the National Academy of Sciences of the United States*  
399 *of America* **114**, E7348-E7357; 10.1073/pnas.1707304114 (2017).
- 400 23. Kirchdoerfer, R. N. *et al.* Stabilized coronavirus spikes are resistant to conformational  
401 changes induced by receptor recognition or proteolysis. *Scientific reports* **8**, 15701;  
402 10.1038/s41598-018-34171-7 (2018).
- 403 24. Zost, S. J. *et al.* Rapid isolation and profiling of a diverse panel of human monoclonal  
404 antibodies targeting the SARS-CoV-2 spike protein. *Nature medicine*; 10.1038/s41591-  
405 020-0998-x (2020).
- 406 25. Wu, Y. *et al.* A noncompeting pair of human neutralizing antibodies block COVID-19 virus  
407 binding to its receptor ACE2. *Science (New York, N.Y.)* **368**, 1274–1278;  
408 10.1126/science.abc2241 (2020).
- 409 26. Henderson, R. *et al.* Controlling the SARS-CoV-2 spike glycoprotein conformation. *Nature*  
410 *structural & molecular biology*; 10.1038/s41594-020-0479-4 (2020).
- 411 27. Muruato, A. E. *et al.* A high-throughput neutralizing antibody assay for COVID-19  
412 diagnosis and vaccine evaluation. *Nature communications* **11**, 4059; 10.1038/s41467-020-  
413 17892-0 (2020).
- 414 28. Singh, D. K. *et al.* SARS-CoV-2 infection leads to acute infection with dynamic cellular  
415 and inflammatory flux in the lung that varies across nonhuman primate species. *bioRxiv*  
416 *2020.06.05.136481*; 10.1101/2020.06.05.136481 (2020).
- 417 29. Corbett, K. S. *et al.* SARS-CoV-2 mRNA vaccine design enabled by prototype pathogen  
418 preparedness. *Nature* **586**, 567–571; 10.1038/s41586-020-2622-0 (2020).
- 419 30. van Doremalen, N. *et al.* ChAdOx1 nCoV-19 vaccine prevents SARS-CoV-2 pneumonia in  
420 rhesus macaques. *Nature* **586**, 578–582; 10.1038/s41586-020-2608-y (2020).
- 421 31. Laczkó, D. *et al.* A Single Immunization with Nucleoside-Modified mRNA Vaccines Elicits  
422 Strong Cellular and Humoral Immune Responses against SARS-CoV-2 in Mice. *Immunity*  
423 **53**, 724-732.e7; 10.1016/j.immuni.2020.07.019 (2020).
- 424 32. Tseng, C.-T. *et al.* Immunization with SARS coronavirus vaccines leads to pulmonary  
425 immunopathology on challenge with the SARS virus. *PLoS ONE* **7**, e35421;  
426 10.1371/journal.pone.0035421 (2012).



- 427 33. Graham, B. S. Rapid COVID-19 vaccine development. *Science (New York, N.Y.)* **368**, 945–  
428 946; 10.1126/science.abb8923 (2020).
- 429 34. Farooq, F. *et al.* Circulating follicular T helper cells and cytokine profile in humans  
430 following vaccination with the rVSV-ZEBOV Ebola vaccine. *Scientific reports* **6**, 27944;  
431 10.1038/srep27944 (2016).
- 432 35. Jafarzadeh, A., Chauhan, P., Saha, B., Jafarzadeh, S. & Nemati, M. Contribution of  
433 monocytes and macrophages to the local tissue inflammation and cytokine storm in COVID-  
434 19: Lessons from SARS and MERS, and potential therapeutic interventions. *Life sciences*,  
435 118102; 10.1016/j.lfs.2020.118102 (2020).
- 436 36. Yang, D. *et al.* Attenuated interferon and pro-inflammatory response in SARS-CoV-2-  
437 infected human dendritic cells is associated with viral antagonism of STAT1  
438 phosphorylation. *The Journal of infectious diseases*; 10.1093/infdis/jiaa356 (2020).
- 439 37. Lambert, P.-H. *et al.* Consensus summary report for CEPI/BC March 12-13, 2020 meeting:  
440 Assessment of risk of disease enhancement with COVID-19 vaccines. *Vaccine* **38**, 4783–  
441 4791; 10.1016/j.vaccine.2020.05.064 (2020).
- 442 38. Slansky, J. E. *et al.* Enhanced antigen-specific antitumor immunity with altered peptide  
443 ligands that stabilize the MHC-peptide-TCR complex. *Immunity* **13**, 529–538;  
444 10.1016/S1074-7613(00)00052-2 (2000).
- 445 39. Holtkamp, S. *et al.* Modification of antigen-encoding RNA increases stability, translational  
446 efficacy, and T-cell stimulatory capacity of dendritic cells. *Blood* **108**, 4009–4017;  
447 10.1182/blood-2006-04-015024 (2006).
- 448 40. Grudzien-Nogalska, E. *et al.* Synthetic mRNAs with superior translation and stability  
449 properties. *Methods in molecular biology (Clifton, N.J.)* **969**, 55–72; 10.1007/978-1-62703-  
450 260-5\_4 (2013).
- 451 41. Berensmeier, S. Magnetic particles for the separation and purification of nucleic acids.  
452 *Appl.Microbiol.Biotechnol.* **73**, 495–504; 10.1007/s00253-006-0675-0 (2006).
- 453 42. Maier, M. A. *et al.* Biodegradable lipids enabling rapidly eliminated lipid nanoparticles for  
454 systemic delivery of RNAi therapeutics. *Molecular therapy : the journal of the American*  
455 *Society of Gene Therapy* **21**, 1570–1578; 10.1038/mt.2013.124 (2013).

- 456 43. Rohou, A. & Grigorieff, N. CTFFIND4: Fast and accurate defocus estimation from electron  
457 micrographs. *Journal of structural biology* **192**, 216–221; 10.1016/j.jsb.2015.08.008  
458 (2015).
- 459 44. Zivanov, J. *et al.* New tools for automated high-resolution cryo-EM structure determination  
460 in RELION-3. *eLife* **7**; 10.7554/eLife.42166 (2018).
- 461 45. Tegunov, D. & Cramer, P. Real-time cryo-electron microscopy data preprocessing with  
462 Warp. *Nature methods* **16**, 1146–1152; 10.1038/s41592-019-0580-y (2019).
- 463 46. Adams, P. D. *et al.* PHENIX: a comprehensive Python-based system for macromolecular  
464 structure solution. *Acta crystallographica. Section D, Biological crystallography* **66**, 213–  
465 221; 10.1107/S0907444909052925 (2010).
- 466 47. Emsley, P., Lohkamp, B., Scott, W. G. & Cowtan, K. Features and development of Coot.  
467 *Acta crystallographica. Section D, Biological crystallography* **66**, 486–501;  
468 10.1107/S0907444910007493 (2010).
- 469 48. Mastrorade, D. N. Automated electron microscope tomography using robust prediction of  
470 specimen movements. *Journal of structural biology* **152**, 36–51; 10.1016/j.jsb.2005.07.007  
471 (2005).
- 472 49. Berger Rentsch, M. & Zimmer, G. A vesicular stomatitis virus replicon-based bioassay for  
473 the rapid and sensitive determination of multi-species type I interferon. *PLoS ONE* **6**,  
474 e25858; 10.1371/journal.pone.0025858 (2011).
- 475 50. Lester, S. *et al.* Middle East respiratory coronavirus (MERS-CoV) spike (S) protein  
476 vesicular stomatitis virus pseudoparticle neutralization assays offer a reliable alternative to  
477 the conventional neutralization assay in human seroepidemiological studies. *Access*  
478 *Microbiology* **1**, 20290; 10.1099/acmi.0.000057 (2019).
- 479 51. Xie, X. *et al.* An Infectious cDNA Clone of SARS-CoV-2. *Cell host & microbe* **27**, 841-  
480 848.e3; 10.1016/j.chom.2020.04.004 (2020).
- 481 52. Joosten, S. A. *et al.* Mycobacterium tuberculosis peptides presented by HLA-E molecules  
482 are targets for human CD8 T-cells with cytotoxic as well as regulatory activity. *PLoS*  
483 *pathogens* **6**, e1000782; 10.1371/journal.ppat.1000782 (2010).

- 484 53. Mehra, S. *et al.* Granuloma correlates of protection against tuberculosis and mechanisms of  
485 immune modulation by *Mycobacterium tuberculosis*. *The Journal of infectious diseases*  
486 **207**, 1115–1127; 10.1093/infdis/jis778 (2013).
- 487 54. Gautam, U. S. *et al.* In vivo inhibition of tryptophan catabolism reorganizes the tuberculoma  
488 and augments immune-mediated control of *Mycobacterium tuberculosis*. *Proceedings of the*  
489 *National Academy of Sciences of the United States of America* **115**, E62-E71;  
490 10.1073/pnas.1711373114 (2018).

491

## 492 **Materials and Methods**

### 493 **Ethics statement.**

494 All mouse studies were performed at BioNTech SE, and protocols were approved by the local  
495 authorities (local welfare committee), conducted according to Federation of European  
496 Laboratory Animal Science Associations recommendations and in compliance with the German  
497 Animal Welfare Act and Directive 2010/63/EU. Only animals with an unobjectionable health  
498 status were selected for testing procedures.

499 Immunisations for the non-human primate (NHP) study were performed at the University of  
500 Louisiana at Lafayette-New Iberia Research Centre (NIRC), which is accredited by the  
501 Association for Assessment and Accreditation of Laboratory Animal Care (AAALAC, Animal  
502 Assurance #: 000452). The work was in accordance with USDA Animal Welfare Act and  
503 Regulations and the NIH Guidelines for Research Involving Recombinant DNA Molecules, and  
504 Biosafety in Microbiological and Biomedical Laboratories. All procedures performed on these  
505 animals were in accordance with regulations and established guidelines and were reviewed and  
506 approved by an Institutional Animal Care and Use Committee or through an ethical review  
507 process. Infectious SARS-CoV-2 challenge of NHPs following immunisation was performed  
508 at the Southwest National Primate Research Centre (SNPRC), Texas Biomedical Research  
509 Institute, which is also accredited by the Association for Assessment and Accreditation of  
510 Laboratory Animal Care (AAALAC, Animal Assurance #: 000246). Animal husbandry  
511 followed standards recommended by AAALAC International and the NIH Guide for the Care  
512 of Use of Laboratory Animals. This study was approved by the Texas Biomedical Research  
513 Institute Animal Care and Use Committee.

### 514 **Protein and peptide reagents.**

515 Purified recombinant SARS-CoV-2 RBD (Sino Biological) or trimeric S protein (Acro  
516 Biosystems) was used as a target for western blot, and the RBD tagged with a human Fc (Sino  
517 Biological) was used in ELISA to detect SARS-CoV-2 S-specific IgG. A recombinant SARS-  
518 CoV-2 RBD containing a C-terminal Avitag™ (Acro Biosystems) was used as a target antigen  
519 in Luminex immunoassays. Purified recombinant SARS-CoV-2 S1 including a histidine tag  
520 (Sino Biological) was used in ELISA to detect SARS-CoV-2 S-specific IgG in mice. Purified  
521 recombinant SARS-CoV-2 S1 and RBD with histidine tags (both Sino Biological) were used  
522 for surface plasmon resonance (SPR) spectroscopy. A peptide pool of 15-mer peptides

523 overlapping by 11 amino acids covering the full length S protein was used for re-stimulation in  
524 ELISpot, cytokine profiling and intracellular cytokine staining followed by flow cytometry. An  
525 irrelevant peptide (SPSYVYHQF, derived from gp70 AH-1<sup>38</sup>) or a CMV peptide pool was used  
526 as control for ELISpot assays. All peptides were obtained from JPT Peptide Technologies.

#### 527 **Human convalescent sera.**

528 Human COVID-19 convalescent sera ( $n=38$ ) were drawn from donors 18-83 years of age at  
529 least 14 days after PCR-confirmed diagnosis and at a time when the participants were  
530 asymptomatic. Most serum donors had outpatient (35/38) or inpatient (1/38) COVID-19; two  
531 of thirty-eight had asymptomatic SARS-CoV-2 infections. Sera were obtained from Sanguine  
532 Biosciences (Sherman Oaks, CA), the MT group (Van Nuys, CA) and Pfizer Occupational  
533 Health and Wellness (Pearl River, NY) and were used across different studies as a reference  
534 benchmark panel<sup>18-20</sup>.

#### 535 **Cell culture.**

536 Human embryonic kidney (HEK)293T and Vero 76 cells (both ATCC) were cultured in  
537 Dulbecco's modified Eagle's medium (DMEM) with GlutaMAX™ (Gibco) supplemented with  
538 10% fetal bovine serum (FBS [Sigma-Aldrich]). Cell lines were tested for mycoplasma  
539 contamination after receipt, before expansion and cryopreservation. For studies including NHP  
540 samples, Vero 76 and Vero CCL81 cells (both ATCC) were cultured in DMEM (Gibco)  
541 containing 2% HyClone fetal bovine and 100 U/mL penicillium/streptomycin (Gibco).  
542 Expi293F™ cells were grown in Expi293™ media and transiently transfected using  
543 ExpiFectamine™293 (all from Thermo Fisher Scientific).

#### 544 ***In vitro* transcription and purification of RNA.**

545 Antigens encoded by BNT162b vaccine candidates were designed on a background of S  
546 sequences from SARS-CoV-2 isolate Wuhan-Hu-1 (GenBank: MN908947.3). The DNA  
547 template for the BNT162b1 RNA is a DNA fragment encoding a fusion protein of the SARS-  
548 CoV-2 S signal peptide (SP, amino acids 1-16), the SARS-CoV-2 S RBD, and the T4  
549 bacteriophage fibritin trimerisation motif<sup>21</sup> ('foldon'). The template for the BNT162b2 RNA  
550 is a DNA fragment encoding SARS-CoV-2 S (GenBank: MN908947) with K986P and V987P  
551 mutations. BNT162b1 and BNT162b2 DNA templates were cloned into a plasmid vector with  
552 backbone sequence elements (T7 promoter, 5' and 3' UTR, 100 nucleotide poly(A) tail)

553 interrupted by a linker (A30LA70, 10 nucleotides) for improved RNA stability and translational  
554 efficiency<sup>14,39</sup>. The DNA was purified, spectrophotometrically quantified, and *in vitro*  
555 transcribed by T7 RNA polymerase in the presence of a trinucleotide cap1 analogue ((m<sub>2</sub><sup>7,3'</sup>-  
556 O)Gppp(m<sup>2'-O</sup>)ApG; TriLink) and with N<sup>1</sup>-methylpseudouridine-5'-triphosphate (m1ΨTP;  
557 Thermo Fisher Scientific) replacing uridine-5'-triphosphate (UTP)<sup>40</sup>. RNA was purified using  
558 magnetic particles<sup>41</sup>. RNA integrity was assessed by microfluidic capillary electrophoresis  
559 (Agilent Fragment Analyser), and the concentration, pH, osmolality, endotoxin level and  
560 bioburden of the solution were determined.

#### 561 **Lipid-nanoparticle formulation of the RNA.**

562 Purified RNA was formulated into LNPs using an ethanolic lipid mixture of ionisable cationic  
563 lipid and transferred into an aqueous buffer system via diafiltration to yield an LNP composition  
564 similar to one previously described<sup>42</sup>. The vaccines candidates were stored at -70 to -80 °C at a  
565 concentration of 0.5 mg/mL.

#### 566 **Transfection of HEK cells.**

567 HEK293T cells were transfected with 1 µg RiboJuice transfection reagent-mixed BNT162b1  
568 RNA or BNT162b2 RNA or with the vaccine candidates BNT162b1 (LNP-formulated  
569 BNT162b1 RNA) or BNT162b2 (LNP-formulated BNT162b2 RNA) by incubation for  
570 18 hours. Non-LNP formulated mRNA was diluted in Opti-MEM medium (Thermo Fisher  
571 Scientific) and mixed with the transfection reagent according to the manufacturer's instructions  
572 (RiboJuice, Merck Millipore).

#### 573 **Western blot analysis of size fractions of the medium of BNT162b1 RNA transfected cells.**

574 Medium from cultured HEK293T cells were collected. After 13-fold concentration via Vivaspin  
575 20 centrifugal concentrators with a molecular weight cut off of 10 kDa, supernatants were  
576 applied to a preparative HiLoad<sup>®</sup> 16/600 Superdex<sup>®</sup> 200 pg column (both Sigma Aldrich). The  
577 column was run at 29.8 cm/h in phosphate buffered saline (PBS), and 500 µL fractions were  
578 collected (Supplementary Fig. 1). The gel filtration column was calibrated with well defined  
579 protein standards separated under identical conditions in a second run. Size fractioned FBS-free  
580 medium from BNT162b1 RNA-transfected HEK293T cells was analysed by denaturing (95°  
581 C) and non-denaturing (no-heating) PAGE using 4–15% Criterion<sup>™</sup> TGX Stain-Free<sup>™</sup> Gel  
582 (Bio-Rad) and western blot. Transfer to a nitrocellulose membrane (Bio-Rad) was performed



583 using a semi-dry transfer system (Trans-Blot Turbo Transfer System, Bio-Rad). Blotted  
584 proteins were detected with a monoclonal antibody that recognizes SARS-CoV-2 S1  
585 (SinoBiological) and a secondary anti-rabbit horse radish peroxidase (HRP)-conjugated  
586 antibody (Sigma Aldrich). Blots were developed with Clarity Western ECL Substrate (Bio-  
587 Rad) and imaged with a Fusion FX Imager (Vilber) using the Image Lab software version 6.0.

#### 588 **Vaccine antigen detection by flow cytometry.**

589 Transfected HEK293T cells were stained with Fixable Viability Dye (eBioscience). After  
590 fixation (Fixation Buffer, Biolegend), cells were permeabilised (Perm Buffer, eBioscience) and  
591 stained with a monoclonal antibody that recognizes SARS-CoV-2 S1 (SinoBiological). Cells  
592 were acquired on a FACSCanto II flow cytometer (BD Biosciences) using BD FACSDiva  
593 software version 8.0.1 and analysed by FlowJo software version 10.6.2 (FlowJo LLC, BD  
594 Biosciences).

#### 595 **Localization of expressed vaccine antigens by immunofluorescence.**

596 Transfected HEK293T cells were fixed in 4% paraformaldehyde (PFA) and permeabilised in  
597 PBS/0.2% Triton X-100. Free binding sites were blocked and cells incubated with a rabbit  
598 monoclonal antibody that recognizes the SARS-CoV-2 S1 subunit (SinoBiological), an anti-  
599 rabbit IgG secondary antibody (Jackson ImmunoResearch), labelled lectin HPA (Thermo  
600 Fisher Scientific) and concanavalin A (Fisher Scientific GmbH). DNA was stained with  
601 Hoechst (Life Technologies). Images were acquired with a Leica SP8 confocal microscope.

602

#### 603 **SARS-CoV-2 RBD-foldon and P2 S expression and purification.**

604 To express the RBD-foldon encoded by BNT162b1 for ACE2 binding analysis and electron  
605 cryomicroscopy, DNA corresponding to the RNA coding sequence was cloned into the  
606 pMCG1309 vector. A plasmid encoding amino acids 1–615 of human ACE2 with C-terminal  
607 His-10 and Avi tags was generated for transient expression of the ACE2 peptidase domain  
608 (ACE2 PD) in Expi293F cells. The ACE2/B<sup>0</sup>AT1 complex was produced by co-expression of  
609 two plasmids in Expi293F cells, one of them encoding ACE2 amino acids 1–17 followed by  
610 haemagglutinin and Strep II tags and ACE2 amino acids 18–805, and the other containing a  
611 methionine followed by a FLAG tag and amino acids 2–634 of human B<sup>0</sup>AT1. Secreted ACE2  
612 PD was isolated from conditioned cell culture medium using Nickel Excel resin (GE

613 Healthcare) followed by gel filtration chromatography on a Superdex200 10/30 column (GE  
614 Healthcare) in PBS. Approximately 5 mg of purified ACE2 PD was covalently attached per 1  
615 mL of 4% beaded agarose by amine coupling using AminoLink Plus resin (Thermo Fisher  
616 Scientific).

617 The RBD-trimer was purified from conditioned medium by affinity capture with the ACE2 PD  
618 crosslinked agarose and was eluted from the resin with 3 M MgCl<sub>2</sub>. Following dialysis, the  
619 protein was concentrated and purified by gel filtration using a Superdex200 10/300 column in  
620 4-(2-hydroxyethyl)-1-piperazineethanesulfonic acid (HEPES)-buffered saline (HBS) with 10%  
621 glycerol. Purification of the ACE2/B<sup>0</sup>AT1 complex was based on the procedure described  
622 previously<sup>5</sup>. To form the ACE2/B<sup>0</sup>AT1/RBD-trimer complex, ACE2/B<sup>0</sup>AT1 aliquots were  
623 combined with purified RBD-foldon diluted in size exclusion chromatography buffer (25 mM  
624 Tris pH 8.0, 150 mM NaCl, 0.02% glyco diosgenin) for a 3:1 molar ratio of RBD-trimers to  
625 ACE2 protomers. After incubation at 4 °C for 30 minutes, the sample was concentrated and  
626 resolved on a Superose 6 Increase 10/300 GL column. Peak fractions containing the complex  
627 were pooled and concentrated.

628 To express SARS-CoV-2 P2 S encoded by BNT162b2 for characterisation by size exclusion  
629 chromatography, ACE2-PD binding, monoclonal antibody binding, and electron  
630 cryomicroscopy, a gene encoding the full length of SARS-CoV-2 (GenBank: MN908947) with  
631 two prolines substituted at residues 986 and 987 (K986P and V987P) followed with a C-  
632 terminal HRV3C protease site and a TwinStrep tag was cloned into a modified pcDNA3.1(+)  
633 vector with the CAG promoter. The TwinStrep-tagged P2 S was expressed in Expi293F cells.

634 Purification of the recombinant protein was based on a procedure described previously, with  
635 minor modifications<sup>6</sup>. Upon cell lysis, P2 S was solubilised in 1% NP-40 detergent. The  
636 TwinStrep-tagged protein was then captured with StrepTactin Sepharose HP resin in 0.5% NP-  
637 40. P2 S was further purified by size-exclusion chromatography and eluted as three distinct  
638 peaks in 0.02 % NP-40 as previously reported<sup>6</sup>. (Chromatogram not shown.) A peak that  
639 consists of intact P2 S migrating at around 150 kDa, as well as dissociated S1 and S2 subunits  
640 (which co-migrate at just above 75 kDa), was used in the structural characterisation.  
641 Spontaneous dissociation of the S1 and S2 subunits occurs throughout the course of protein  
642 purification, starting at the point of detergent-mediated protein extraction, so that P2 S  
643 preparations also contain dissociated S1 and S2.

644 **Binding kinetics of the RBD-foldon trimer and P2 S to immobilised human ACE2 and a**  
645 **neutralizing monoclonal antibody by biolayer interferometry.**

646 Binding of purified RBD-foldon to the human ACE2 peptidase domain (ACE2 PD) and of NP-  
647 40 solubilised, purified P2 S to ACE2-PD and human neutralising monoclonal antibody B38<sup>25</sup>  
648 was measured by biolayer interferometry at 25 °C on an Octet RED384 (FortéBio). RBD-foldon  
649 binding was measured in 10 mM HEPES pH 7.5, 150 mM NaCl and 1 mM  
650 ethylenediaminetetraacetic acid (EDTA). P2 S binding was measured in 25 mM Tris pH 7.5,  
651 150 mM NaCl, 1 mM EDTA and 0.02% NP-40. Avi-tagged human ACE2 PD was immobilised  
652 on streptavidin-coated sensors; Avi-tagged B38 antibody was immobilised on protein G-coated  
653 sensors. For a RBD-foldon concentration series, binding data were collected for 600 seconds  
654 of association and 900 seconds of dissociation. For a P2 S concentration series, after initial  
655 baseline equilibration of 120 seconds, the sensors were dipped in a 10 µg/mL solution of Avi-  
656 tagged ACE2-PD or B38 mAb for 300 seconds to achieve capture levels of 1 nM using the  
657 threshold function. Then, after another 120 seconds of baseline, binding data were collected for  
658 300 seconds of association and 600 seconds of dissociation.

659 Biolayer interferometry data were collected with Octet Data Acquisition software version  
660 10.0.0.87 and processed using ForteBio Data Analysis software version 10.0. Data were  
661 reference subtracted and fit to a 1:1 binding model with  $R^2$  value greater than 0.96 for the RBD  
662 and 0.95 for P2 S to determine kinetics and affinity (P2 S) or avidity (RBD-foldon) of binding  
663 using Octet Data Analysis Software v10.0 (FortéBio). For the RBD-foldon, the dissociation rate  
664 of interaction ( $k_d$ ) with ACE2-PD was slower than the limit of measurement of the instrument,  
665 and the minimum binding avidity ( $K_D$ ) was estimated using an assumed dissociation rate  $k_d$  of  
666  $1 \times 10^{-6} \text{ s}^{-1}$ .

667 **Electron microscopy of negatively stained RBD-foldon trimers.**

668 Purified RBD-foldon in 4 µL was applied to a glow-discharged copper grid overlaid with  
669 formvar and amorphous carbon (Ted Pella). Negative staining was performed with Nano-W  
670 organotungstate stain (Nanoprobes) according to the manufacturer's protocol. The sample  
671 imaged using an FEI TF-20 microscope operating at 200 kV, with a magnification of 62,000x  
672 and defocus of -2.5 µm. Micrographs were contrast transfer function (CTF)-corrected in  
673 RELION using CTFIND-4.1<sup>43</sup>. A small manually picked dataset was used to generate 2D  
674 references for auto-picking. The resulting particle set was subjected to 2D classification in  
675 RELION 3.0.6<sup>44</sup>.

676 **Cryo-EM of the ACE2/B<sup>0</sup>AT1/RBD-trimer complex.**

677 Cryo-EM was performed using a Titan Krios operating at 300 keV equipped with a Gatan K2  
678 Summit direct electron detector in super-resolution mode at a magnification of 165,000x, for a  
679 magnified pixel size of 0.435 Å at the specimen level.

680 Purified ACE2/B<sup>0</sup>AT1/RBD-trimer complex at 6 mg/mL in 4 µL was applied to gold Quantifoil  
681 R1.2/1.3 200 mesh grids glow discharged in residual air for 30 seconds at 20 mA using a Pelco  
682 Easiglow. The sample was blotted using a Vitrobot Mark IV for 5 seconds with a force of -3  
683 before being plunged into liquid ethane cooled by liquid nitrogen. In total, 7,455 micrographs  
684 were collected from a single grid. Data were collected over a defocus range of -1.2 to -3.4 µm  
685 with a total electron dose of 52.06 e<sup>-</sup>/Å<sup>2</sup> fractionated into 40 frames over a 6-second exposure  
686 for 1.30 e<sup>-</sup>/Å<sup>2</sup>/frame. Initial motion correction was performed in Warp<sup>45</sup>, during which super-  
687 resolution data were binned to give a pixel size of 0.87 Å. Corrected micrographs were imported  
688 into RELION 3.1-beta<sup>44</sup> for CTF estimation with CTFFIND-4.1<sup>43</sup>.

689 Particles were picked using the LaPlacian-of-Gaussian particle picking algorithm as  
690 implemented in RELION and extracted with a box size of 450 pixels. References obtained by  
691 2D classification were used for a second round of reference-based auto-picking, yielding a  
692 dataset of 715,356 particles. Two of the three RBDs of each particle (the two not constrained  
693 by binding to ACE2/B<sup>0</sup>AT1) exhibited diffuse density in 2D classification that reflected high  
694 particle flexibility, consistent with the conformational flexibility of RBD trimers observed by  
695 negative stain EM (Fig. 1c, d). This flexibility precluded the inclusion of all three RBDs in the  
696 final structural solution. Particle heterogeneity was filtered out with 2D and 3D classification  
697 with a mask size of 280 Å to filter out the diffuse density of the two non-ACE2-bound RBD  
698 copies in each RBD-trimer, yielding a set of 87,487 particles, which refined to 3.73 Å with C2  
699 symmetry. Refinement after subtraction of micelle and B<sup>0</sup>AT1 density from the particles  
700 yielded an improved map of 3.24 Å. The atomic model from PDB ID 6M17<sup>5</sup> was rigid-body  
701 fitted into the 3.24 Å density and then flexibly fitted to the density using real-space refinement  
702 in Phenix<sup>46</sup> alternating with manual building in Coot<sup>47</sup>. The microscope was operated for image  
703 acquisition using SerialEM software version 3.8.0 beta<sup>48</sup>. Validation of this model is shown in  
704 Supplementary Fig. 2. Data collection, 3D reconstruction and model refinement statistics are  
705 listed in Extended Data Table 1.

706

707 **Cryo-EM of P2 S.**

708 For TwinStrep-tagged P2 S, 4  $\mu\text{L}$  purified protein at 0.5 mg/mL were applied to gold Quantifoil  
709 R1.2/1.3 300 mesh grids freshly overlaid with graphene oxide. The sample was blotted using a  
710 Vitrobot Mark IV for 4 seconds with a force of -2 before being plunged into liquid ethane cooled  
711 by liquid nitrogen. 27,701 micrographs were collected from two identically prepared grids. Data  
712 were collected from each grid over a defocus range of -1.2 to -3.4  $\mu\text{m}$  with a total electron dose  
713 of 50.32 and 50.12  $\text{e}^-/\text{\AA}^2$ , respectively, fractionated into 40 frames over a 6-second exposure for  
714 1.26 and 1.25  $\text{e}^-/\text{\AA}^2/\text{frame}$ . On-the-fly motion correction, CTF estimation, and particle picking  
715 and extraction with a box size of 450 pixels were performed in Warp<sup>45</sup>, during which super-  
716 resolution data were binned to give a pixel size of 0.87  $\text{\AA}$ . A total of 1,119,906 particles were  
717 extracted. All subsequent processing was performed in RELION 3.1-beta<sup>44</sup>. Particle  
718 heterogeneity was filtered out with 2D and 3D classification, yielding a set of 73,393 particles,  
719 which refined to 3.6  $\text{\AA}$  with C3 symmetry. 3D classification of this dataset without particle  
720 alignment separated out one class with a single RBD up, representing 15,098 particles. The  
721 remaining 58,295 particles, in the three RBD ‘down’ conformation, were refined to give a final  
722 model at 3.29  $\text{\AA}$ . The atomic model from PDB ID 6XR8<sup>6</sup> was rigid-body fitted into the map  
723 density, then flexibly fitted to the density using real-space refinement in Phenix<sup>46</sup> alternating  
724 with manual building in Coot<sup>47</sup>. The cryo-EM model validation is provided in Extended Data  
725 Fig. 2, the full cryo-EM data processing workflow, and the model refinement statistics in  
726 Extended Data Table. 1.

727 **Immunisation.**

728 *Mice.* Female BALB/c mice (Janvier; 8-12 weeks) were randomly allocated to groups.  
729 BNT162b1 and BNT162b2 were diluted in PBS with 300 mM sucrose (Fig. 2 and Fig. 3b, d for  
730 BNT162b2, and Extended Data Fig. 3) or 0.9% NaCl placebo control (Fig. 3a, c and Fig. 3b, d  
731 for BNT162b1, and Extended Data Fig. 4) and injected IM into the gastrocnemius muscle at a  
732 volume of 20  $\mu\text{L}$  under isoflurane anaesthesia.

733 *Rhesus macaques (Macaca mulatta).* Male rhesus macaques (2–4 years old) were randomly  
734 assigned to receive BNT162b1 or BNT162b2 on Days 0 and 21 or saline control on Days 0 and  
735 21 or 35. Vaccine was administered in 0.5 mL by IM injection in the left quadriceps muscle.  
736 Animals were anaesthetised with ketamine HCl (10 mg/kg; IM) during immunisation and were  
737 monitored for adequate sedation.

738 **Phlebotomy and tissue preparation.**

739 *Mice*. Peripheral blood was collected from the retro-orbital venous plexus under isoflurane  
740 anaesthesia or *vena facialis* without anaesthesia. For flow cytometry, blood was heparinised.  
741 For serum generation, blood was centrifuged for 5 min at 16,000 x g, and the serum was  
742 immediately used for downstream assays or stored at -20 °C. Spleen single-cell suspensions  
743 were prepared in PBS by mashing tissue against the surface of a 70 µm cell strainer (BD  
744 Falcon). Erythrocytes were removed by hypotonic lysis. Popliteal, inguinal and iliac lymph  
745 nodes were pooled, cut into pieces, digested with collagenase D (1 mg/mL; Roche) and passed  
746 through cell strainers.

747 *Rhesus macaques (Macaca mulatta)*. Serum was obtained before, 6 hours after, and 1, 14, 21,  
748 28, 35 and 42 days after immunisation with BNT162b1, BNT162b2, or saline (Extended Data  
749 Table 2). For BNT162b2 and challenge cohort 3 controls, serum was also obtained on Day 56,  
750 and PBMCs were obtained before immunisation and on Days 7, 28, and 42, except that PBMCs  
751 were not obtained from the challenge cohort 3 control animals on Day 28. Blood for serum and  
752 PBMCs was collected in compliance with animal protocol 2017-8725-023 approved by the  
753 NIRC Institutional Animal Care and Use Committee. Animals were anaesthetised with ketamine  
754 HCl (10 mg/kg; IM) during blood collection and were monitored for adequate sedation.

755 **Analysis of S1- and RBD-specific serum IgG.**

756 *Mice*. MaxiSorp plates (Thermo Fisher Scientific) were coated with recombinant S1 or RBD  
757 (1 µg/mL) in sodium carbonate buffer, and serum-derived, bound IgG was detected using a  
758 horseradish peroxidase (HRP)-conjugated secondary antibody and tetramethylbenzidine  
759 (TMB) substrate (Biotrend). Data collection was performed using a BioTek Epoch reader and  
760 Gen5 software version 3.0.9. For concentration analysis, an IgG mouse isotype control was  
761 used in parallel in a serial dilution, and the sample signals were correlated to a standard curve  
762 of the isotype control.

763 *Rhesus macaques (Macaca mulatta), humans*. Recombinant SARS-CoV-2 S1 containing a C-  
764 terminal Avitag™ (Acro Biosystems) was bound to streptavidin-coated Luminex microspheres.  
765 Bound rhesus macaque or human anti-S1 antibodies present in the serum were detected with a  
766 fluorescently labelled goat anti-human polyclonal secondary antibody (Jackson  
767 ImmunoResearch). Data were captured as median fluorescent intensities (MFIs) using a  
768 Bioplex200 system (Bio-Rad) and converted to U/mL antibody concentrations using a reference



769 standard consisting of 5 pooled human COVID-19 convalescent serum samples (obtained  
770 >14 days PCR diagnosis, from the panel described above), diluted in antibody depleted human  
771 serum with arbitrary assigned concentrations of 100 U/mL and accounting for the serum  
772 dilution factor.

### 773 **Surface plasmon resonance spectroscopy of polyclonal mouse immune sera.**

774 Binding kinetics of murine S1- and RBD-specific serum IgG to recombinant S1 and RBD was  
775 determined using a Biacore T200 device (Cytiva) with 10 mM Hepes, 150 mM NaCl, 3 mM  
776 EDTA, 0.05% v/v surfactant P20 (HBS-EP running buffer, BR100669, Cytiva) at 25 °C.  
777 Carboxyl groups on the CM5 sensor chip matrix were activated with a mixture of 1-ethyl-3-(3-  
778 dimethylaminopropyl) carbodiimidehydrochloride (EDC) and N-hydroxysuccinimide (NHS) to  
779 form active esters for the reaction with amine groups. Anti-mouse-Fc-antibody (Jackson  
780 ImmunoResearch) was diluted in 10 mM sodium acetate buffer pH 5 (30 µg/mL) for covalent  
781 coupling to immobilisation level of ~10,000 response units (RU). Free N-hydroxysuccinimide  
782 esters on the sensor surface were deactivated with ethanolamine.

783 Mouse serum was diluted 1:50 in HBS-EP buffer and applied at 10 µL/min for 30 seconds to  
784 the active flow cell for capture by immobilised antibody, while the reference flow cell was  
785 treated with buffer. Binding analysis of captured murine IgG antibodies to S1-His or RBD-His  
786 (Sino Biological Inc.) was performed using a multi-cycle kinetic method with concentrations  
787 ranging from 25 to 400 nM or 1.5625 to 50 nM, respectively. An association period of 180  
788 seconds was followed by a dissociation period of 600 seconds with a constant flow rate of 40  
789 µL/min and a final regeneration step. Binding kinetics were calculated using a global kinetic fit  
790 model (1:1 Langmuir, Biacore T200 Evaluation Software Version 3.1, Cytiva).

791

### 792 **VSV-SARS-CoV-2 S pseudovirus entry inhibition assay by serum IgG in mice.**

793 A recombinant replication-deficient vesicular stomatitis virus (VSV) vector that encodes green  
794 fluorescent protein (GFP) instead of VSV-G (VSVΔG-GFP) was pseudotyped with SARS-  
795 CoV-2 S according to published pseudotyping protocols<sup>49,50</sup>. In brief, HEK293T/17 monolayers  
796 transfected to express SARS-CoV-2 S truncated of the C-terminal cytoplasmic 19 amino acids  
797 (SARS-CoV-2-S-CΔ19) were inoculated with VSVΔG-GFP vector (rescued from pVSVΔG-  
798 GFP plasmid expression vector; Kerastat Inc.). After incubation for 1 h at 37 °C, the inoculum

799 was removed, and cells were washed with PBS before medium supplemented with anti-VSV-  
800 G antibody (clone 8G5F11, Kerfast Inc.) was added to neutralise residual input virus.  
801 VSV/SARS-CoV-2 pseudovirus-containing medium was harvested 20 h after inoculation,  
802 0.2 µm filtered and stored at -80 °C.

803 Vero-76 cells were seeded in 96-well plates. Serial dilutions of mouse serum samples were  
804 prepared and pre-incubated for 10 min at room temperature with VSV/SARS-CoV-2  
805 pseudovirus suspension ( $4.8 \times 10^3$  infectious units [IU]/mL) before transferring the mix to  
806 Vero-76 cells. Inoculated Vero-76 cells were incubated for 20 h at 37 °C. Plates were placed in  
807 an IncuCyte Live Cell Analysis system (Sartorius) and incubated for 30 min prior to the analysis  
808 (IncuCyte 2019B Rev2 software). Whole well scanning for brightfield and GFP fluorescence  
809 was performed using a 4× objective. The 50% pseudovirus neutralisation titre (pVNT<sub>50</sub>) was  
810 reported as the reciprocal of the highest dilution of serum still yielding a 50% reduction in GFP-  
811 positive infected cell number per well compared to the mean of the no serum pseudovirus  
812 positive control. Each serum sample dilution was tested in duplicates.

### 813 **IFN $\gamma$ and IL-4 ELISpot.**

814 *Mice.* ELISpot assays were performed with mouse IFN $\gamma$  ELISpot<sup>PLUS</sup> kits according to the  
815 manufacturer's instructions (Mabtech). A total of  $5 \times 10^5$  splenocytes was *ex vivo* restimulated  
816 with the full-length S peptide mix (0.1 µg/mL final concentration per peptide) or controls  
817 (gp70-AH1 [SPSYVYHQF]<sup>38</sup>, 4 µg/mL; concanavalin A [ConA], 2 µg/mL [Sigma]).  
818 Streptavidin-alkaline phosphatase (ALP) and 5-bromo-4-chloro-3'-indolyl phosphate  
819 (BCIP)/nitro blue tetrazolium (NBT)-plus substrate were added, and spots counted using an  
820 ELISpot plate reader (ImmunoSpot® S6 Core Analyzer [CTL]). Spot numbers were evaluated  
821 using ImmunoCapture Image Acquisition Software V7.0 and ImmunoSpot 7.0.17.0  
822 Professional. Spot counts denoted too numerous to count by the software were set to 1,500. For  
823 T-cell subtyping, CD8<sup>+</sup> T cells and CD4<sup>+</sup> T cells were isolated from splenocyte suspensions  
824 using MACS MicroBeads (CD8a [Ly-2] and CD4 [L3T4] [Miltenyi Biotec]) according to the  
825 manufacturer's instructions. CD8<sup>+</sup> or CD4<sup>+</sup> T cells ( $1 \times 10^5$ ) were subsequently re-stimulated  
826 with  $5 \times 10^4$  syngeneic bone marrow-derived dendritic cells loaded with full-length S peptide  
827 mix (0.1 µg/mL final concentration per peptide), or cell culture medium as control. Purity of  
828 isolated T-cell subsets was determined by flow cytometry to calculate spot counts per  $1 \times 10^5$   
829 CD8<sup>+</sup> or CD4<sup>+</sup> T cells.

830 *Rhesus macaques (Macaca mulatta)*. Rhesus macaque PBMCs were tested with commercially  
831 available NHP IFN $\gamma$  and IL-4 ELISpot assay kits (Mabtech). Cryopreserved rhesus macaque  
832 PBMCs were thawed in pre-warmed AIM-V media (Thermo Fisher Scientific) with Benzonase  
833 (EMD Millipore). For IFN $\gamma$  ELISpot,  $1.0 \times 10^5$  PBMCs and for IL-4 ELISpot,  $2.5 \times 10^5$  PBMCs  
834 were stimulated *ex vivo* with 1  $\mu\text{g}/\text{mL}$  of the full-length S overlapping peptide mix. Tests were  
835 performed in triplicate wells and medium containing dimethyl sulphoxide (media-DMSO), a  
836 CMV peptide pool and phytohemagglutinin (PHA; Sigma) were included as controls. After 24  
837 h for IFN $\gamma$  and 48 h for IL-4, streptavidin-HRP and 3-amino-9-ethylcarbazole (AEC) substrate  
838 (BD Bioscience) were added and spots counted using a CTL ImmunoSpot S6 Universal  
839 Analyzer (CTL). Results shown are background (Medium-DMSO) subtracted and normalised  
840 to SFC/ $10^6$  PBMCs.

#### 841 **Cell-mediated immunity by flow cytometry.**

842 *Mice*. For T-cell analysis in peripheral blood, erythrocytes from 50  $\mu\text{L}$  freshly drawn blood  
843 were lysed (ammonium-chloride-potassium [ACK] lysing buffer [Gibco]), and cells were  
844 stained with Fixable Viability Dye (eBioscience) and primary antibodies in the presence of Fc  
845 block in flow buffer (Dulbecco's phosphate-buffered saline [Gibco] supplemented with 2% fetal  
846 calf serum (FCS), 2 mM ethylenediaminetetraacetic acid [both Sigma] and 0.01% sodium azide  
847 [Morphisto]). After staining with secondary biotin-coupled antibodies in flow buffer, cells were  
848 stained extracellularly against surface markers with directly labelled antibodies and streptavidin  
849 in Brilliant Stain Buffer Plus (BD Bioscience) diluted in flow buffer. Cells were washed with  
850 2% RotiHistofix (Carl Roth), fixed (Fix/Perm Buffer, FoxP3/Transcription Factor Staining  
851 Buffer Set [eBioscience]) and permeabilised (Perm Buffer, FoxP3/Transcription Factor  
852 Staining Buffer Set [eBioscience]) overnight. Permeabilised cells were intracellularly treated  
853 with Fc block and stained with antibodies against transcription factors in Perm Buffer.

854 For T-cell analysis in lymphoid tissues,  $1 \times 10^6$  lymph node cells (for BNT162b1) or  $1.5 \times 10^6$   
855 lymph node cells (for BNT162b2) and  $4 \times 10^6$  spleen cells were stained for viability and  
856 extracellular antigens with directly labelled antibodies. Fixation, permeabilisation and  
857 intracellular staining was performed as described for blood T-cell staining.

858 For B-cell subtyping in lymphoid tissues,  $2.5 \times 10^5$  lymph node and  $1 \times 10^6$  spleen cells were  
859 treated with Fc block, stained for viability and extracellular antigens as described for blood T-  
860 cell staining and fixed with 2% RotiHistofix overnight.

861 For intracellular cytokine staining of T cells from BNT162b1-immunised mice,  $1 \times 10^6$  lymph  
862 node and  $4 \times 10^6$  spleen cells were *ex vivo* restimulated with 0.2  $\mu\text{g}/\text{mL}$  final concentration per  
863 peptide of full-length S peptide mix. For intracellular cytokine staining of T cells from mice  
864 immunised with BNT162b2,  $4 \times 10^6$  spleen cells were *ex vivo* restimulated with 0.5  $\mu\text{g}/\text{mL}$  final  
865 concentration per peptide of full-length S peptide mix or cell culture medium (no peptide) as  
866 control. The cells were restimulated for 5 hours in the presence of GolgiStop and GolgiPlug  
867 (both BD Bioscience) for 5 hours. Cells were stained for viability and extracellular antigens as  
868 described for lymphoid T-cell staining. Cells were fixed with 2% RotiHistofix and  
869 permeabilised overnight. Intracellular staining was performed as described for blood T-cell  
870 staining.

871 Mouse cells were acquired on a BD Symphony A3 or BD Celesta (B-cell subtyping) flow  
872 cytometer (BD Bioscience) using BD FACSDiva software version 9.1 or 8.0.1.1, respectively,  
873 and analysed with FlowJo 10.6 (FlowJo LLC, BD Biosciences).

874 *Rhesus macaques (Macaca mulatta)*. For intracellular cytokine staining in T cells,  $1.5 \times 10^6$   
875 PBMCs were stimulated with the full-length S peptide mix at 1  $\mu\text{g}/\text{mL}$  (concentration of all  
876 peptides, combined), Staphylococcus enterotoxin B (SEB; 2  $\mu\text{g}/\text{mL}$ ) as positive control, or  
877 0.2% DMSO as negative control. GolgiStop and GolgiPlug (both BD Bioscience) were added.  
878 Following 37 °C incubation for 12 to 16 h, cells were stained for viability and extracellular  
879 antigens after blocking Fc binding sites with directly labelled antibodies. Cells were fixed,  
880 permeabilised with BDCytoFix/CytoPerm solution (BD Bioscience), and intracellular staining  
881 was performed in the permeabilisation buffer for 30 min at room temperature. Cells were  
882 washed, resuspended in 2% FBS/PBS buffer and acquired on an LSR Fortessa. Data were  
883 analysed by FlowJo 10.4.1 (FlowJo LLC, BD Biosciences). Results shown are background  
884 (media-DMSO) subtracted.

#### 885 **Cytokine profiling in mice by bead-based immunoassay.**

886 Mouse splenocytes were re-stimulated for 48 h with full-length S peptide mix (0.1  $\mu\text{g}/\text{mL}$  final  
887 concentration per peptide) or cell culture medium (no peptide) as control. Concentrations of  
888 IFN $\gamma$ , IL-2, IL-4, IL-5 and (for splenocytes from BNT162b2-immunised mice) IL-13 in  
889 supernatants were determined using a bead-based, 11-plex T<sub>H</sub>1/T<sub>H</sub>2 mouse ProcartaPlex  
890 multiplex immunoassay (Thermo Fisher Scientific) according to the manufacturer's  
891 instructions. Fluorescence was measured with a Bioplex200 system (Bio-Rad) and analysed

892 with ProcartaPlex Analyst 1.0 software (Thermo Fisher Scientific). Values below the lower  
893 limit of quantification (LLOQ) were set to zero.

894 **SARS-CoV-2 neutralisation by rhesus macaque (*Macaca mulatta*) sera.**

895 The SARS-CoV-2 neutralisation assay used a previously described strain of SARS-CoV-2  
896 (USA\_WA1/2020) that had been rescued by reverse genetics and engineered by the insertion  
897 of an mNeonGreen (mNG) gene into open reading frame 7 of the viral genome<sup>27</sup>. This reporter  
898 virus generates similar plaque morphologies and indistinguishable growth curves from wild-  
899 type virus. Viral master stocks were grown in Vero E6 cells as previously described<sup>51</sup>. When  
900 testing human convalescent serum specimens, the fluorescent neutralisation assay produced  
901 comparable results to the conventional plaque reduction neutralisation assay. Serial dilutions of  
902 heat-inactivated sera were incubated with the reporter virus ( $2 \times 10^4$  plaque forming units [PFU]  
903 per well) to yield an approximately 10-30% infection rate of the Vero CCL81 monolayer for 1  
904 h at 37 °C before inoculating Vero CCL81 cell monolayers (targeted to have 8,000 to 15,000  
905 cells in the central field of each well at the time of seeding, one day before infection) in 96-well  
906 plates to allow accurate quantification of infected cells. Cell counts were enumerated by nuclear  
907 stain (Hoechst 33342), and fluorescent virus-infected foci were detected 16-24 hours after  
908 inoculation with a Cytation 7 Cell Imaging Multi-Mode Reader (BioTek) with Gen5 Image  
909 Prime version 3.09. Titres were calculated in GraphPad Prism version 8.4.2 by generating a 4-  
910 parameter (4PL) logistical fit of the percent neutralisation at each serial serum dilution. The  
911 50% neutralisation titre (VNT<sub>50</sub>) was reported as the interpolated reciprocal of the dilution  
912 yielding a 50% reduction in fluorescent viral foci.

913 **SARS-CoV-2 challenge of rhesus macaques (*Macaca mulatta*).**

914 The SARS-CoV-2 inoculum was obtained from a stock of  $2.1 \times 10^6$  PFU/mL previously  
915 prepared at Texas Biomedical Research Institute (San Antonio, TX), aliquoted into single use  
916 vials, and stored at -70 °C. The working virus stock was generated from two passages of the  
917 SARS-CoV-2 USA-WA1/2020 isolate (a 4<sup>th</sup> passage seed stock purchased from BEI Resources;  
918 NR-52281) in Vero E6 cells. The virus was confirmed to be SARS-CoV-2 by deep sequencing  
919 that demonstrated identity to a published SARS-CoV-2 sequence (GenBank accession number  
920 MN985325.1).

921 BNT162b1-immunised ( $n=6$ ), BNT162b2-immunised ( $n=6$ ), and age-matched saline-  
922 immunised ( $n=9$ ) male rhesus macaques (control) were challenged with  $1.05 \times 10^6$  plaque

923 forming units of SARS-CoV-2 USA-WA1/2020 isolate, split equally between the intranasal  
924 (IN; 0.25 mL) and intratracheal (IT; 0.25 mL) routes as previously described<sup>28</sup>. Sentinel age-  
925 and sex-matched animals ( $n=6$ ) were mock challenged with DMEM supplemented with 10%  
926 FCS IN (0.25 mL) and IT (0.25 mL). The macaques were challenged or mock challenged at the  
927 times relative to immunisation indicated in Extended Data Fig. 6 and Extended Data Table 2.

928 Twelve to nineteen days prior to challenge, animals were moved from the NIRC, in New Iberia,  
929 LA, where they had been immunised, to the animal biosafety level 3 facility at SNPRC (in San  
930 Antonio, TX). Animals were monitored regularly by a board-certified veterinary clinician for  
931 rectal body temperature, weight and physical examination. Specimen collection was performed  
932 under tiletamine zolazepam (Telazol) anaesthesia as described<sup>28</sup>. Bronchoalveolar lavage  
933 (BAL), nasal, OP and rectal swab collection, X-ray and CT examinations and necropsy were  
934 performed at the times indicated in Extended Data Figure 6 and Extended Data Table 2. The 3  
935 control animals in challenge cohort 3 and 3 sentinel animals were not necropsied to allow their  
936 subsequent re-challenge (control) or challenge (sentinel). BAL was performed by instilling 20  
937 mL of saline 4 times. These washings were pooled, aliquoted and stored frozen at -70 °C.

### 938 **SARS-CoV-2 viral RNA quantification by reverse-transcription quantitative polymerase** 939 **chain reaction.**

940 To detect and quantify SARS-CoV-2 in NHP, viral RNA was extracted from BAL fluid and  
941 from nasal, OP, and rectal swabs as previously described<sup>52-54</sup> and tested by RT-qPCR as  
942 previously described<sup>28</sup>. Briefly, 10 µg yeast tRNA and  $1 \times 10^3$  PFU of MS2 phage (*Escherichia*  
943 *coli* bacteriophage MS2, ATCC) were added to each thawed sample, and RNA extraction  
944 performed using the NucleoMag Pathogen kit (Macherey-Nagel). The SARS-CoV-2 RT-qPCR  
945 was performed on extracted RNA using a CDC-developed 2019-nCoV N1 assay on a  
946 QuantStudio 3 instrument (Applied Biosystems). The cut-off for positivity (limit of detection,  
947 LOD) was established at 10 gene equivalents (GE) per reaction (800 GE/mL). Samples were  
948 tested in duplicate. One BAL specimen from the challenge cohort 2 control group obtained on  
949 Day 6 after challenge and one nasal swab from the BNT162b1-immunised group obtained on  
950 Day 1 after challenge had, on repeated measurements, viral RNA levels on either side of the  
951 LLOD. These specimens were categorised as indeterminate and excluded from the graphs and  
952 the analysis.



953 **Radiology.**

954 Thoracic radiographs and computed tomography (CT) scans were performed under anesthesia  
955 as previously described<sup>28</sup>. For radiographic imaging, 3-view thoracic radiographs (ventrodorsal,  
956 right and left lateral) were obtained at the times relative to challenge indicated in Extended Data  
957 Table 2. The animals were anesthetized using Telazol (2-6 mg/kg) and maintained by inhaled  
958 isoflurane delivered through a Hallowell 2002 ventilator anesthesia system (Hallowell,  
959 Pittsfield, MA). Animals were intubated to perform end inspiratory breath-hold using a remote  
960 breath-hold switch. Lung field CT images were acquired using Multiscan LFER150 PET/CT  
961 (MEDISO Inc., Budapest, Hungary) scanner. Image analysis was performed using 3D ROI tools  
962 available in Vivoquant (Invicro, Boston, MA). Images were interpreted by a board-certified  
963 veterinary radiologist blinded to treatment groups. Scores were assigned to a total of 7 lung  
964 regions on a severity scale of 0-3 per region, with a maximum severity score of 21. Pulmonary  
965 lesions evident prior to challenge, or those which could not be unequivocally attributed to the  
966 viral challenge (such as atelectasis secondary to recumbency and anesthesia) received a score  
967 of “0”.

968 **Histopathology.**

969 Lung histopathology is reported on necropsies performed on 2-4 year old male rhesus macaques  
970 at the times after challenge indicated in Extended Data Figure 6 and Extended Data Table 2.  
971 Necropsy, tissue processing, and histology were performed by SNPRC in San Antonio, TX.  
972 Samples were fixed in 10% neutral buffered formalin and processed routinely into paraffin  
973 blocks. Tissue blocks were sectioned to 5 µm and stained with hematoxylin and eosin.  
974 Microscopic evaluation of 7 lung tissue sections per animal (1 sample of each lobe on L & R)  
975 was performed blindly by SNPRC and Pfizer pathologists. Lungs were evaluated using a semi-  
976 quantitative scoring system with inclusion of cell types and/or distribution as appropriate.  
977 Inflammation score was based on area of tissue in section involved: 0 = normal; 1=<10%; 2=11-  
978 30%; 3=30-60%; 4= 60-80%; 5=>80%. Each lobe received an individual score, and the final  
979 score for each animal was reported as the mean of the individual scores. The pathologists were  
980 unblinded to the group assignments after agreement on diagnoses. As indicated in Extended  
981 Data Fig. 6 and Extended Data Table 2, the BNT162b1-immunised and control macaques were  
982 challenged and necropsied in parallel (challenge cohorts 1 and 2), and the BNT162b2-  
983 immunised rhesus macaques were immunised and challenged subsequently (challenge cohort  
984 3).

985

986 **Statistics and reproducibility.**

987 No statistical methods were used to predetermine group and samples sizes (*n*). All experiments  
988 were performed once. P-values reported for RT-qPCR analysis were determined by  
989 nonparametric analysis (Friedman's test) based on the ranking of viral RNA shedding data  
990 within each day. PROC RANK and PROC GLM from SAS® 9.4 were used to calculate the p-  
991 values. All available post-challenge BAL fluid and nasal, OP, and rectal swab samples from the  
992 necropsied animals and all available post-challenge samples through Day 10 from the animals  
993 not necropsied were included in the analysis. Indeterminate results were excluded from this  
994 analysis. All remaining analyses were two-tailed and carried out using GraphPad Prism 8.4.

995 **Data availability.**

996 The data that support the findings of this study are available from the corresponding author  
997 upon reasonable request.

998 **Acknowledgements**

999 We thank T. Garretson and D. Cooper for advice on and M. Cutler for coordination of NHP  
1000 serology studies. We thank R. F. Sommese and K. F. Fennell for technical assistance for  
1001 molecular cloning and cell-based binding. Valuable support and assistance M. Dvorak, M.  
1002 Drude, F. Zehner, T. Lapin, B. Ludloff, S. Hinz, F. Bayer, J. Scholz, A.L. Ernst, T. Sticker and  
1003 S. Wittig resulted in a rapid availability of oligonucleotides and DNA templates. E. Boehm, K.  
1004 Goebel, R. Frieling, C. Berger, S. Koch, T. Wachtel, J. Leilich, M. Mechler, R. Wysocki, M.  
1005 Le Gall, A. Czech and S. Klenk carried out RNA production and analysis. Without their  
1006 commitment during this pandemic situation, this vaccine candidate could not have been  
1007 transferred to non-clinical studies in light speed. B. Weber, J. Vogt, S. Krapp, K. Zwadlo, J.  
1008 Mottl, J. Mühl and P. Windecker supported the mouse studies and serological analysis with  
1009 excellent technical assistance. We thank radiologists A. K. Voges and E. Clemmons for  
1010 interpreting radiographs for the nonhuman primate study and S. Ganatra for radiology services.  
1011 We thank E. Romero for veterinary services and K.A. Soileau and the staff of the New Iberia  
1012 Research Centre for non-human primate care. We thank E.J. Dick for veterinary pathology. We  
1013 thank Polymun Scientific for excellent formulation services as well as Acuitas Therapeutics for

1014 fruitful discussions. We thank S. Wigge and C. Lindemann for scientific writing support and  
1015 manuscript review.

## 1016 **Author Contributions**

1017 U.S. conceived and conceptualised the work and strategy. S.H., S.C.D., A.A.H.S., C.G.,  
1018 R.d.I.C.G.G., and M.C.G. designed primers, performed oligosynthesis, cloned constructs and  
1019 performed protein expression experiments. T.Z., S.F., J.S. and A.N.K. developed, planned,  
1020 performed and supervised RNA synthesis and analysis. E.H.M. purified P2 S. N.L.N. purified  
1021 RBD-trimer and ACE2 PD. J.A.L. developed ACE2/B<sup>0</sup>AT1/RBD-trimer formation and  
1022 purified the complex. P.V.S. developed and performed bilayer interferometry experiments.  
1023 J.A.L. and S.H. performed electron microscopy and solved the structure of the complex. Y.C.  
1024 supervised the structural and biophysical characterisation and analysed the structures. A.M. and  
1025 B.G.L. performed surface plasmon resonance spectroscopy. A.G., S.A.K, S.S., T.H., L.F. and  
1026 F.V. planned, performed and analysed *in vitro* studies. F.B., T.K., C.R. managed formulation  
1027 strategy. A.B.V., M.V., L.M.K., K.C.W. designed mouse studies, analysed and interpreted data.  
1028 A.P., S.E., D.P. and G.S. performed and analysed the S1- and RBD-binding IgG assays. M.G.  
1029 designed and optimized MS2-SARS-nCoV-2-N1 RT-qPCR assay. M.G., R.C., Jr., and K.J.A.  
1030 performed and analysed viral RT-qPCR data. A.M., B.S. and A.W. performed and analysed  
1031 pVNT, C.F.-G. and P.-Y.S performed and analysed VNT assays. D.E., D.S., B.J., Y.F, H.J.  
1032 performed *in vivo* studies and ELISpot assays. A.B.V., K.C.W. J.L., M.S.M. A.O.-S., and M.V.  
1033 planned, analysed and interpreted ELISpot assays. L.M.K., J.L., D.E., Y.F., H.J., A.P.H.  
1034 M.S.M. and P.A. planned, performed and analysed flow cytometry assays. A.B.V., L.M.K.,  
1035 Y.F. and H.J. planned, performed, analysed and interpreted cytokine release assays. M.R.G.  
1036 read and interpreted radiographs and CT scan. O.G. and S.C. read and interpreted  
1037 histopathology specimens. R.S.S. and S.C. interpreted histopathology data. I.K., K.A.S., K.T.,  
1038 C.Y.T., M.G., D.K. and P.R.D. designed NHP studies, analysed and interpreted data. K.T.,  
1039 M.P., I.L.S. and W.K. oversaw NHP immunogenicity and serology testing. S.H.-U. and K.B.  
1040 provided veterinary services for NHPs. J.A.F., J.C., T.C. and J.O. managed the NHP colony.  
1041 U.S., Ö.T., P.R.D, L.M.K., A.M., M.V. contributed to synthesis and integrated interpretation of  
1042 obtained data. A.B.V., I.K., Y.C., A.M., M.V, L.M.K., C.T., K.A.S., Ö.T., P.R.D, K.U.J. and  
1043 U.S. wrote the manuscript. All authors supported the review of the manuscript.

## 1044 **Competing interests**

1045 The authors declare: U.S. and Ö.T. are management board members and employees at  
1046 BioNTech SE (Mainz, Germany); K.C.W., B.G.L., D.S., B.J., T.H., T.K. and C.R. are  
1047 employees at BioNTech SE; A.B.V., A.M., M.V., L.M.K., S.H., A.G., T.Z., F.B., A.P., D.E.,  
1048 S.C.D., S.F., S.E., F.B., B.S., A.W., Y.F., H.J., S.A.K., S.S., A.P.H., P.A., J.S., A.A.H.S., C.K.,  
1049 R.d.I.C.G.G., L.F. and A.N.K. are employees at BioNTech RNA Pharmaceuticals GmbH  
1050 (Mainz, Germany); A.B.V., A.M., K.C.W., A.G., S.F., A.N.K and U.S. are inventors on patents  
1051 and patent applications related to RNA technology and COVID-19 vaccine; A.B.V., A.M.,  
1052 M.V., L.M.K., K.C.W., S.H., B.G.L., A.P., D.E., S.C.D., S.F., S.E., D.S., B.J., B.S., A.P.H.,  
1053 P.A. J.S., A.A.H.S., T.H., L.F., C.K., T.K., C.R., A.N.K., Ö.T. and U.S. have securities from  
1054 BioNTech SE; I.K., Y.C., K.A.S. J.A.L. M.S.M., K.T., A.O.-S., J.A.F., M.C.G., S.H., J.A.L.,  
1055 E.H.M., N.L.N., P.V.S., C.Y.T., D.P., W.V.K., J.O., R.S.S., S.C., T.C., I.L.S., M.W.P., G.S.,  
1056 and P.R.D., K.U.J. are employees of Pfizer and may hold stock options; C.F.-G. and P.-Y.S.  
1057 received compensation from Pfizer to perform neutralisation assays; M.R.G. received  
1058 compensation from Pfizer to read and interpret radiographs and CT scans. J.C., S.H.-U, K.B.,  
1059 R.C., Jr., K.J.A. O.G., and D.K., are employees of Southwest National Primate Research Center,  
1060 which received compensation from Pfizer to conduct the animal challenge work; M.G. is an  
1061 employee of Texas Biomedical Research Institute, which received compensation from Pfizer to  
1062 conduct the RT-qPCR viral load quantification; no other relationships or activities that could  
1063 appear to have influenced the submitted work.

## 1064 **Funding**

1065 BioNTech is the Sponsor of the study, and Pfizer is its agent. BioNTech and Pfizer are  
1066 responsible for the design, data collection, data analysis, data interpretation, and writing of the  
1067 report. The corresponding authors had full access to all the data in the study and had final  
1068 responsibility for the decision to submit the data for publication. This study was not supported  
1069 by any external funding at the time of submission.

## 1070 **Additional Information**

1071 Supplementary Information is available for this study.

1072 Correspondence and requests for materials should be addressed to Ugur Sahin.

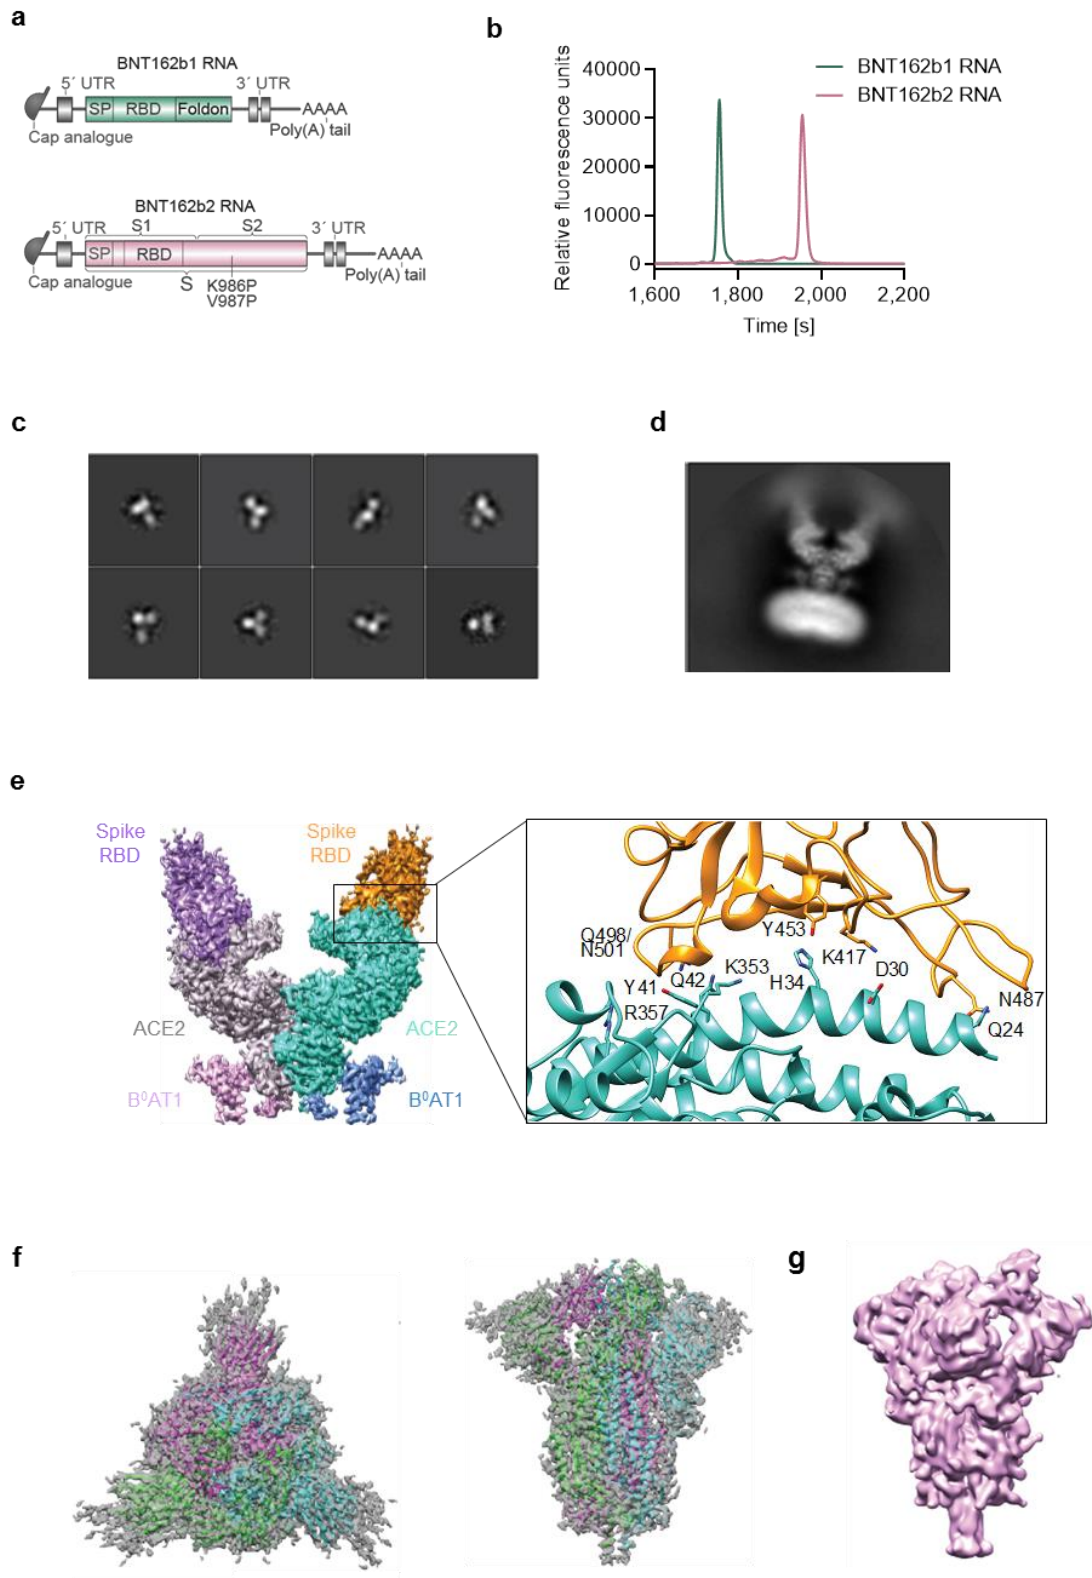

1073

1074 **Figure 1. Vaccine design and characterisation of the expressed antigens.**

1075 **a**, Structure of BNT162b RNAs. UTR, untranslated region; SP, signal peptide; RBD, receptor-  
1076 binding domain; S1 and S2, N-terminal and C-terminal furin cleavage fragments, respectively;

1077 S, SARS-CoV-2 S glycoprotein. Proline mutations K986P and V897P are indicated. **b**, Liquid  
1078 capillary electropherograms of both *in vitro* transcribed BNT162b RNAs. **c**, Representative 2D  
1079 class averages from EM of negatively stained RBD-foldon trimers. Box edge: 37 nm. **d**, 2D  
1080 class average from cryo-EM of the ACE2/B<sup>0</sup>AT1/RBD-foldon trimer complex. Long box edge:  
1081 39.2 nm. Peripheral to the relatively well-defined density of each RBD domain bound to ACE2,  
1082 there is diffuse density attributed to the remainder of the flexibly tethered RBD-foldon trimer.  
1083 A detergent micelle forms the density at the end of the complex opposite the RBD-foldon. **e**,  
1084 Density map of the ACE2/B<sup>0</sup>AT1/RBD-foldon trimer complex at 3.24 Å after focused  
1085 refinement of the ACE2 extracellular domain bound to a RBD monomer. Surface colour-coding  
1086 by subunit. The ribbon model refined to the density shows the RBD-ACE2 binding interface,  
1087 with residues potentially mediating polar interactions labeled. **f**, 3.29 Å cryo-EM map of P2 S,  
1088 with fitted and refined atomic model, viewed down the three-fold axis toward the membrane  
1089 (left) and viewed perpendicular to the three-fold axis (right). Coloured by protomer. **g**, Mass  
1090 density map of TwinStrep-tagged P2 S produced by 3D classification of images extracted from  
1091 cryo-EM micrographs with no symmetry averaging, showing the class in the one RBD ‘up’,  
1092 two RBD ‘down’ position.



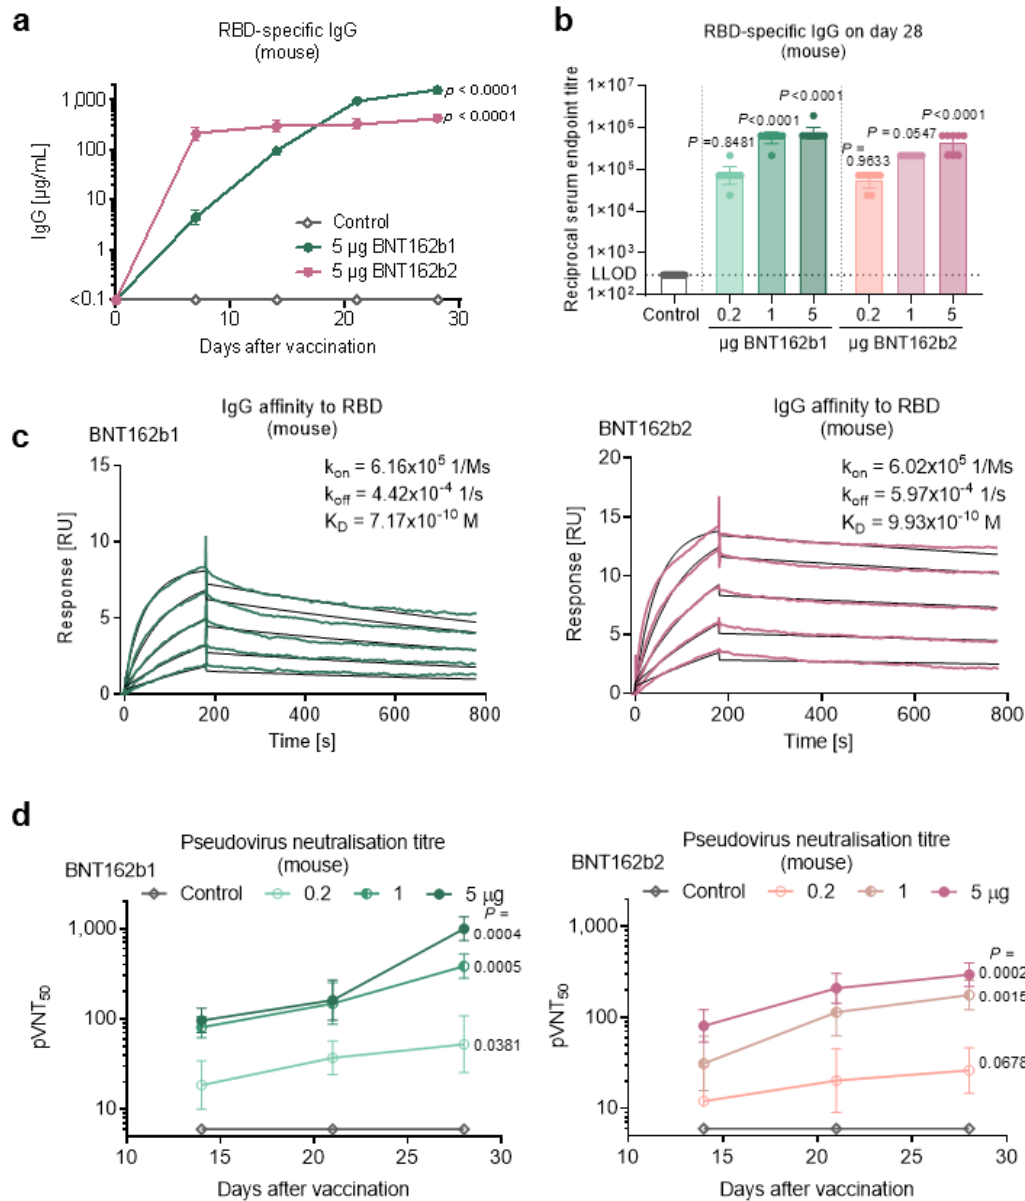

1093

1094 **Figure 2. Mouse humoral immunogenicity.**

1095 BALB/c mice ( $n=8$ ) were immunised intramuscularly (IM) with a single dose of each BNT162b  
 1096 vaccine candidate or buffer control. Geometric mean of each group  $\pm$  95% confidence interval  
 1097 (CI) (a, b, d). Day 28 p-values compared to control (multiple comparison of mixed-effect  
 1098 analysis [a, d] and OneWay ANOVA [b], all using Dunnett's multiple comparisons test) are  
 1099 provided. **a**, RBD-specific IgG levels in sera of mice immunised with 5  $\mu\text{g}$  of BNT162b  
 1100 candidates, determined by ELISA. For day 0 values, a pre-screening of randomly selected  
 1101 animals was performed ( $n=4$ ). For IgG levels with lower BNT162b doses and sera testing for  
 1102 detection of S1 see Extended Data Figure 3a, b. **b**, Reciprocal serum endpoint titres of RBD-

1103 specific IgG 28 days after immunisation. The horizontal dotted line indicates the lower limit of  
1104 detection (LLOD). **c**, Representative surface plasmon resonance sensorgrams of the binding  
1105 kinetics of His-tagged RBD to immobilised mouse IgG from serum drawn 28 days after  
1106 immunisation with 5  $\mu$ g of each BNT162b. Actual binding (in colour) and the best fit of the  
1107 data to a 1:1 binding model (black) are depicted. For binding kinetics of same sera to His-tagged  
1108 S1 see Extended Data Figure 3d. **d**, Pseudovirus-based VSV-SARS-CoV-2 50% neutralisation  
1109 titres (pVNT<sub>50</sub>) in sera of mice immunised with BNT162b vaccine candidates. For number of  
1110 infected cells per well with serum samples drawn 28 days after immunisation and titre  
1111 correlation to a SARS-CoV-2 virus neutralisation assay see Extended Data Figure 3e-g.

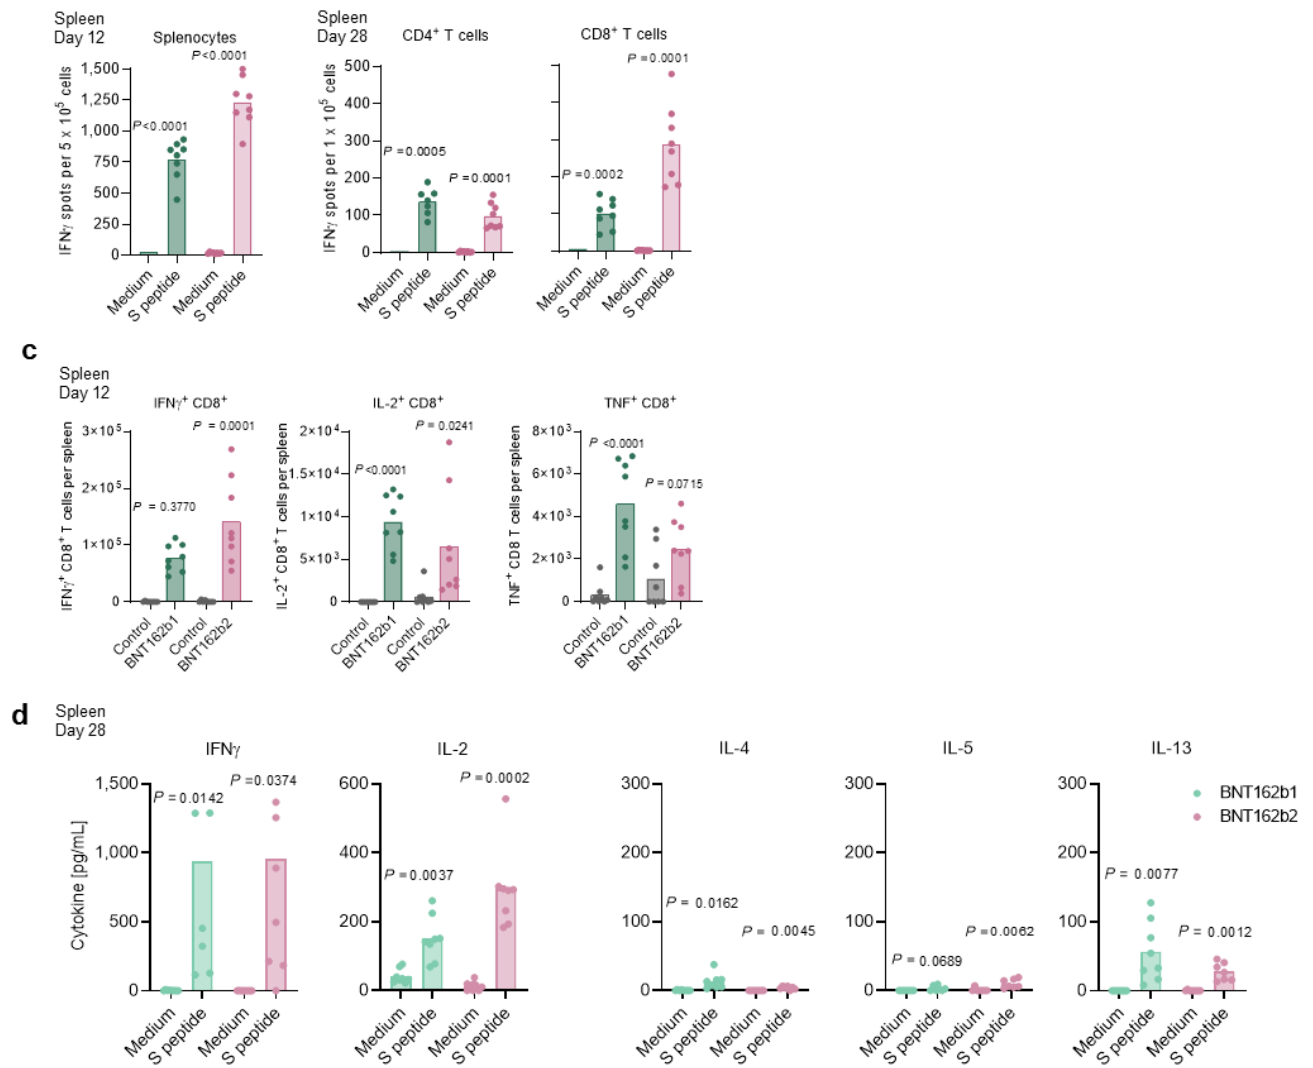

1112

1113 **Figure 3. Mouse cellular immunogenicity.**

1114 Splenocytes of BALB/c mice ( $n=8$ , unless stated otherwise) immunised IM with BNT162b  
 1115 vaccines were *ex vivo* re-stimulated with full-length S peptide mix (a-d) or cell culture medium  
 1116 (a, b, d). Symbols represent individual animals. Means of each group are shown, P-values  
 1117 compare immunised groups with the control (two-tailed paired t-test). **a**, IFN $\gamma$  ELISpot of  
 1118 splenocytes after immunisation with 5  $\mu$ g BNT162b vaccines. **b**, IFN $\gamma$  ELISpot of splenic CD4 $^+$   
 1119 or CD8 $^+$  T cells after immunisation with 1  $\mu$ g BNT162b vaccines (BNT162b1:  $n=7$  for CD4 $^+$  T  
 1120 cells, one outlier removed by Grubbs test,  $\alpha=0.05$ ). **c**, CD8 $^+$  T-cell specific cytokine release by  
 1121 splenocytes after immunisation with 5  $\mu$ g BNT162b vaccines or buffer (Control), determined  
 1122 by flow cytometry. S-peptide specific responses are corrected for background (medium).  
 1123 **d**, Cytokine production by splenocytes after immunisation with 0.2  $\mu$ g BNT162b1 or 1  $\mu$ g

1124 BNT162b2, determined by bead-based multiplex analysis (BNT162b2:  $n=7$  for IL-4, IL-5 and  
1125 IL-13, one outlier removed by the ROUT method [Q=1%] for the S peptide stimulated samples).  
1126

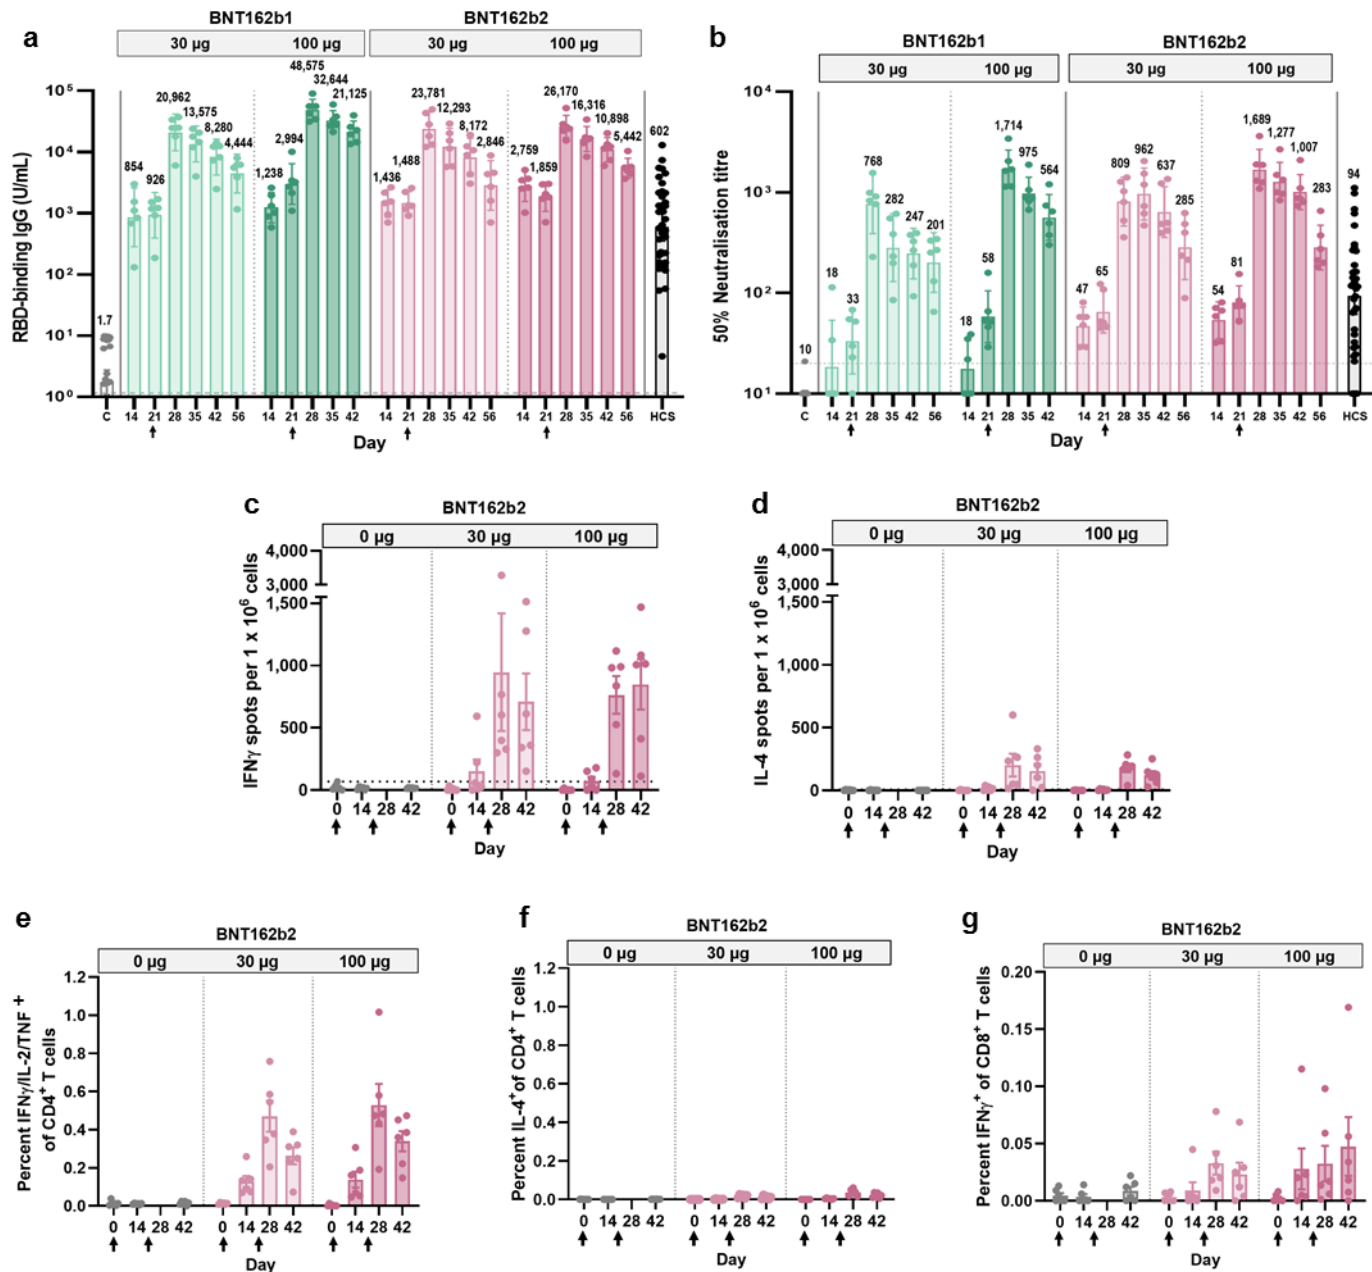

1127

1128 **Figure 4. Rhesus macaque immunogenicity.**

1129 Male rhesus macaques, 2-4 years of age, were immunised on Days 0 and 21 (arrows below the  
 1130 x-axis indicate the days of the second immunisation) with 30 µg or 100 µg BNT162b vaccines  
 1131 ( $n=6$  each). Additional rhesus macaques received saline (C;  $n=9$ ). Human convalescent sera  
 1132 (HCS) were obtained from SARS-CoV-2-infected patients at least 14 days after PCR-confirmed  
 1133 diagnosis and at a time when acute COVID-19 symptoms had resolved ( $n=38$ ). The HCS panel  
 1134 is a benchmark for serology studies in this and other manuscripts. **a**, Concentrations, in arbitrary  
 1135 units, of IgG binding recombinant SARS-CoV-2 RBD (LLOD = 1.72 U/mL). **b**, SARS-CoV-2  
 1136 50% virus neutralisation titres (VNT<sub>50</sub>, LLOD = 20). **c-g**, PBMCs collected on Days 0, 14, 28

1137 and 42 were *ex vivo* re-stimulated with full-length S peptide mix. **c**, IFN $\gamma$  ELISpot. **d**, IL-4  
1138 ELISpot. **e**, S-specific CD4<sup>+</sup> T-cell IFN $\gamma$ , IL-2, or TNF $\alpha$  release by flow cytometry (LLOD =  
1139 0.04). **f**, S-specific CD4<sup>+</sup> T-cell IL-4 release by flow cytometry (LLOD = 0.05). **g**, CD8<sup>+</sup> T-cell  
1140 IFN $\gamma$  release by flow cytometry (LLOD = 0.03). Heights of bars indicate the geometric (a-b) or  
1141 arithmetic (c-g) means for each group, with values written above bars (a-b). Whiskers indicate  
1142 95% confidence intervals (CI's; a-b) or standard errors of means (SEMs; c-g). Each symbol  
1143 represents one animal. Horizontal dashed lines mark LLODs. For serology and ELISpot data  
1144 (a-d) but not for flow cytometry data (e-g), values below the LLOD were set to ½ the LLOD.  
1145 Arrows below the x-axis indicate the days of Doses 1 and 2.

1146

1147



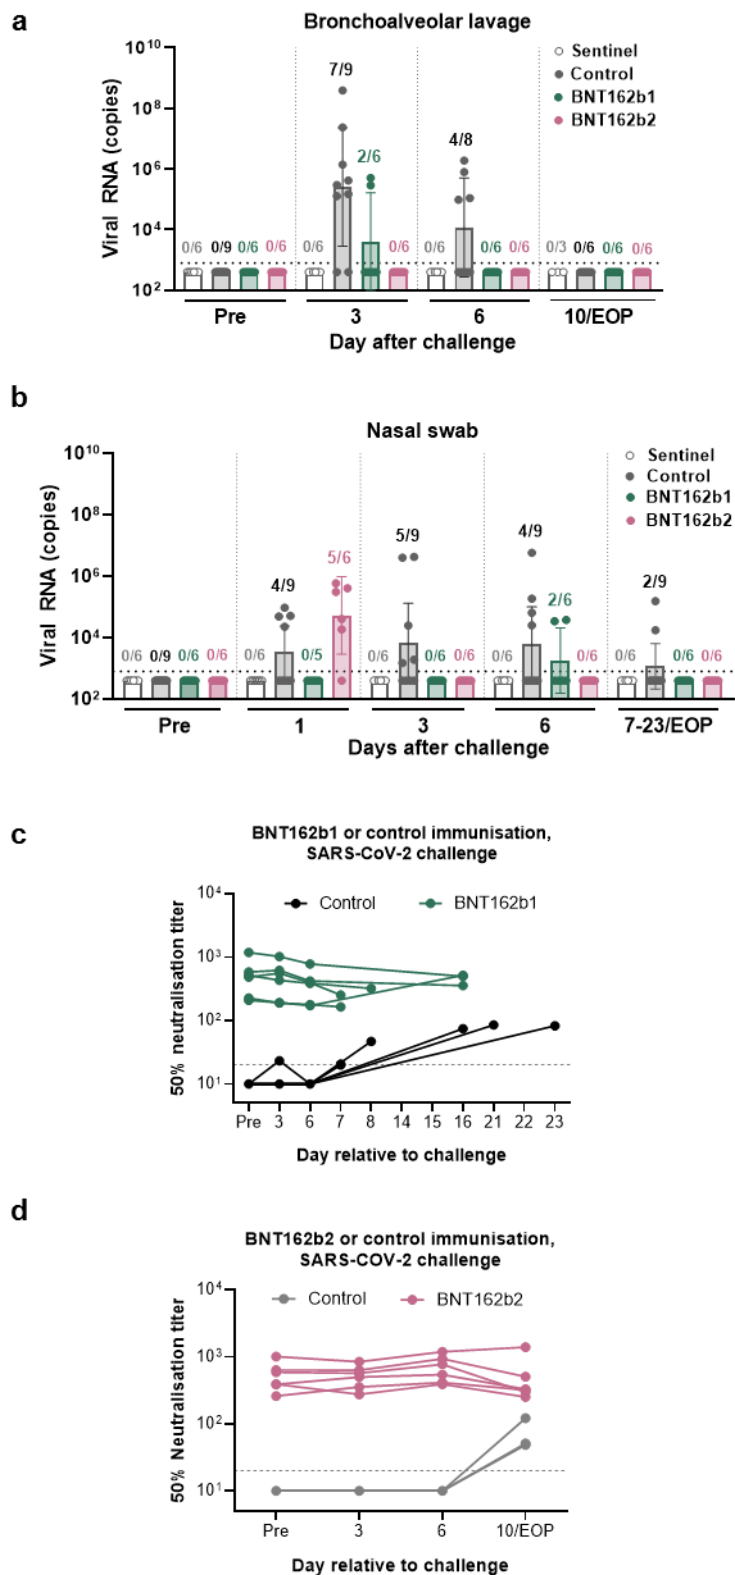

1148

1149 **Figure 5. Virological and serological evidence of protection of rhesus macaques from**  
 1150 **challenge with infectious SARS-CoV-2.**

1151 Rhesus macaques immunised with 100 µg of BNT162b1 or BNT162b2 ( $n=6$  each) or mock  
1152 immunised with saline challenge (Control,  $n=9$ ) were challenged with  $1.05 \times 10^6$  total plaque  
1153 forming units (PFU) of SARS-CoV-2 split equally between the intranasal (IN) and intratracheal  
1154 (IT) routes. Additional macaques (Sentinel,  $n=6$ ) were mock-challenged with cell culture  
1155 medium. Macaque assignments to cohorts and schedules of immunisation, challenge, and  
1156 sample collection are provided in Extended Data Fig. 6 and Extended Data Table 2. Viral RNA  
1157 levels were detected by RT-qPCR. **a**, Viral RNA in bronchoalveolar lavage (BAL) fluid. **b**,  
1158 Viral RNA in nasal swabs. Symbols represent individual animals. Ratios above bars indicate  
1159 the number of viral RNA positive animals among all animals in a group with evaluable samples.  
1160 Heights of bars indicate geometric mean viral RNA copies; whiskers indicate geometric  
1161 standard deviations. Each symbol represents one animal. Dotted lines indicate the lower limit  
1162 of detection (LLOD). Values below the LLOD were set to  $\frac{1}{2}$  the LLOD. The statistical  
1163 significance by a non-parametric test (Friedman's test) of differences in viral RNA detection  
1164 after challenge between 6 BNT162b1-immunised and 6 mock-immunised animals (challenge  
1165 cohorts 1 and 2) was  $p = 0.015$  for BAL fluid and  $p = 0.005$  for nasal swab; between 6  
1166 BNT162b2-immunised animals and 3 mock-immunised animals (challenge cohort 3), the  
1167 statistical significance was  $p = 0.001$  for BAL fluid and  $p = 0.262$  for nasal swabs. Serum  
1168 samples were assayed for SARS-CoV-2 50% neutralisation titres (VNT<sub>50</sub>). **c**, BNT162b1-  
1169 immunised macaques and Controls (challenge cohorts 1 and 2). **d**, BNT162b2-immunised  
1170 macaques and Controls (challenge cohort 3). Symbols represent individual animal titres.  
1171 Horizontal dashed lines indicate the LLOQ of 20.

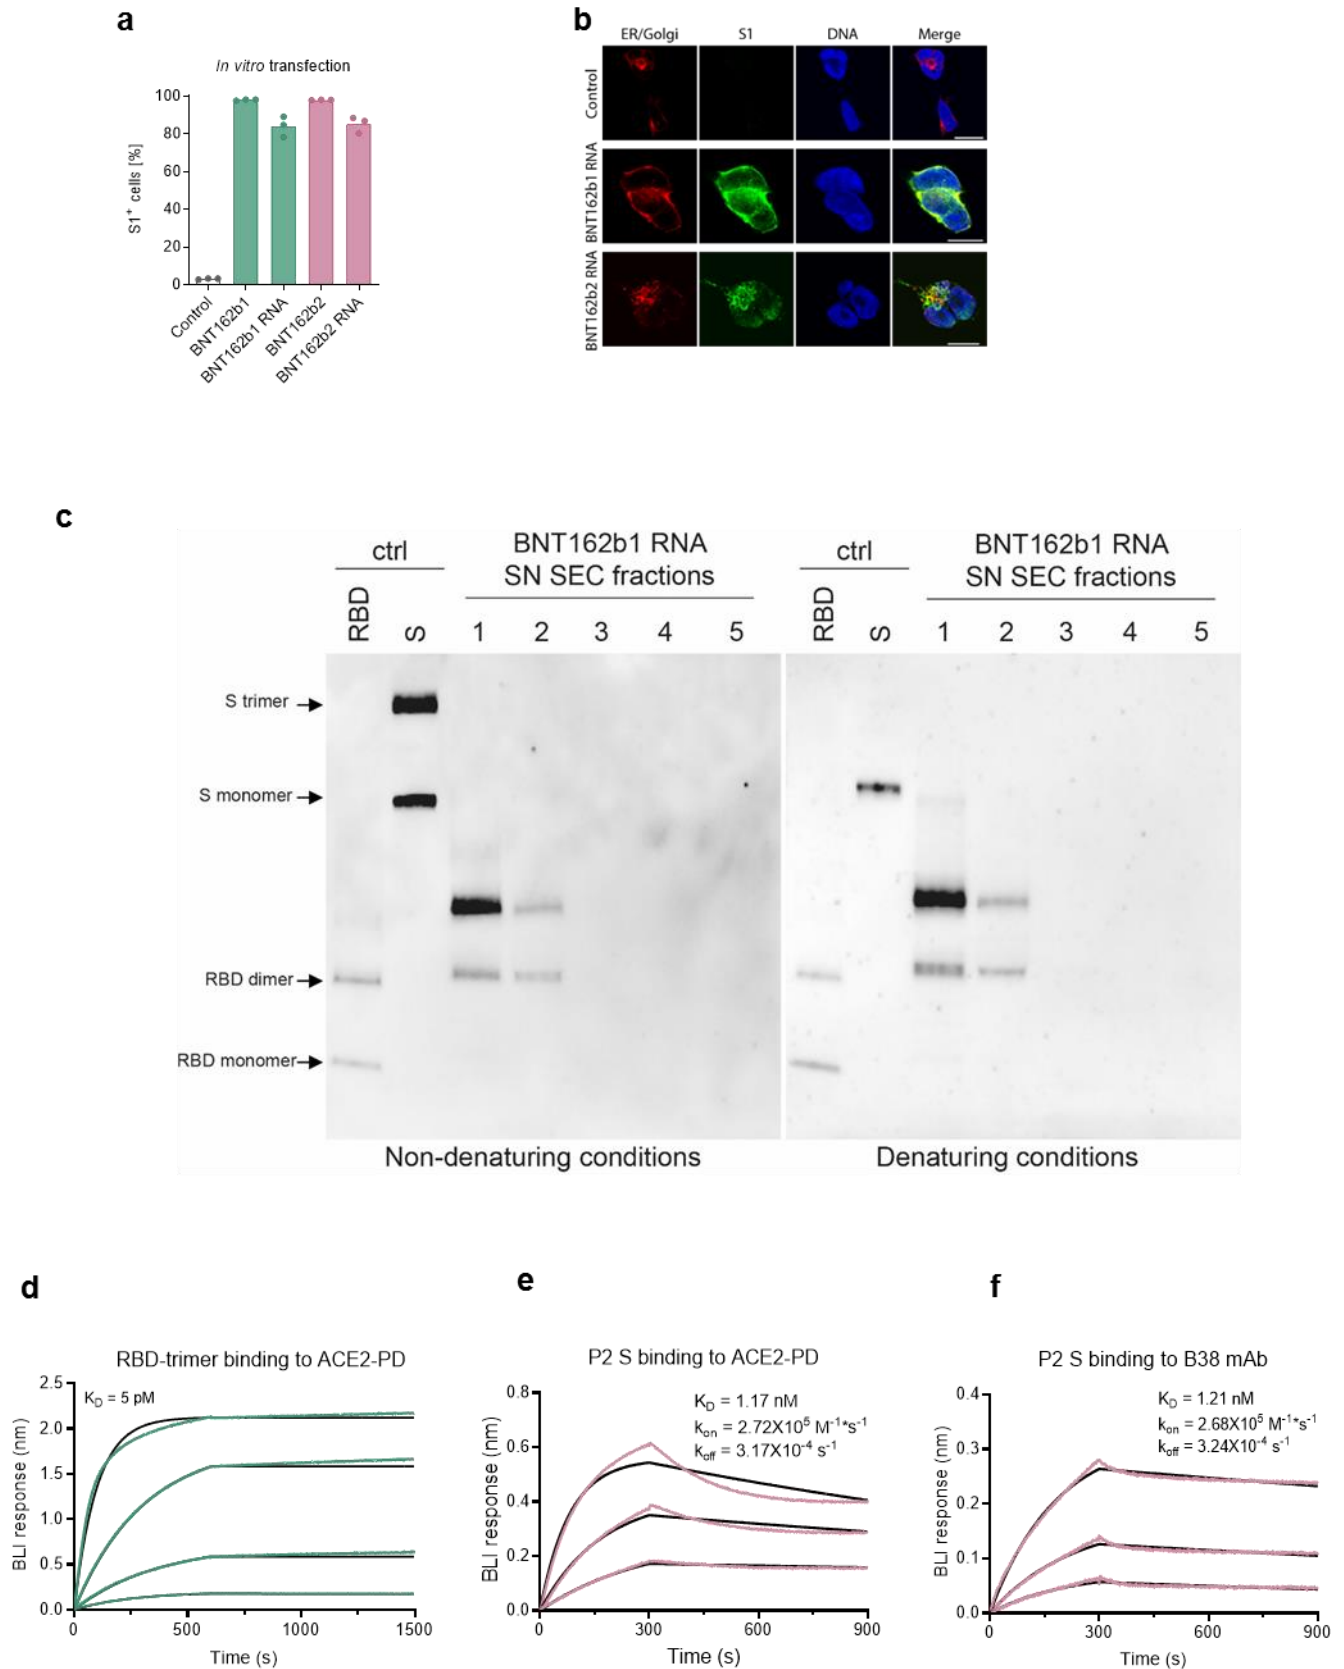

1172

1173 **Extended Data Figure 1. Vaccine antigen expression and receptor affinity.**

1174 **a**, Detection of BNT162b1-encoded RBD-foldon and BNT162b2-encoded P2 S in HEK293T  
1175 cells by S1-specific antibody staining and flow cytometry. HEK293T cells analysed by flow  
1176 cytometry were incubated with: no RNA (control), BNT162b RNAs formulated as LNPs  
1177 (BNT162b1, BNT162b2) or BNT162b RNAs mixed with a transfection reagent (BNT162b1  
1178 RNA, BNT162b2 RNA). **b**, Localisation of BNT162b1 RNA-encoded RBD-foldon or  
1179 BNT162b2 RNA-encoded P2 S in HEK293T cells transfected as in panel a, determined by  
1180 immunofluorescence staining. Endoplasmic reticulum and Golgi (ER/Golgi, red), S1 (green)  
1181 and DNA (blue). Scale bar: 10  $\mu$ m. **c**, Western blot of denatured and non-denatured samples of  
1182 size exclusion chromatography (SEC) fractions (chromatogram in Supplementary Fig. 1) of  
1183 concentrated medium from HEK293T cells transfected with BNT162b1 RNA. The RBD-foldon  
1184 was detected with a rabbit monoclonal antibody against the S1 fragment of SARS-CoV-2 S.  
1185 Protein controls (ctrl): purified, recombinant RBD and S. **d**, Biolayer interferometry  
1186 sensorgram demonstrating the binding kinetics of the purified RBD-foldon trimer, expressed  
1187 from DNA, to immobilised human ACE2-PD. **e,f** Biolayer interferometry sensorgrams showing  
1188 binding of a DNA-expressed P2 S preparation from a size exclusion chromatography peak (not  
1189 shown) that contains intact P2 S and dissociated S1 and S2 to immobilised (**e**) human ACE2-  
1190 PD and (**f**) B38 monoclonal antibody. Binding data are in colour; 1:1 binding models fit to the  
1191 data are in black.

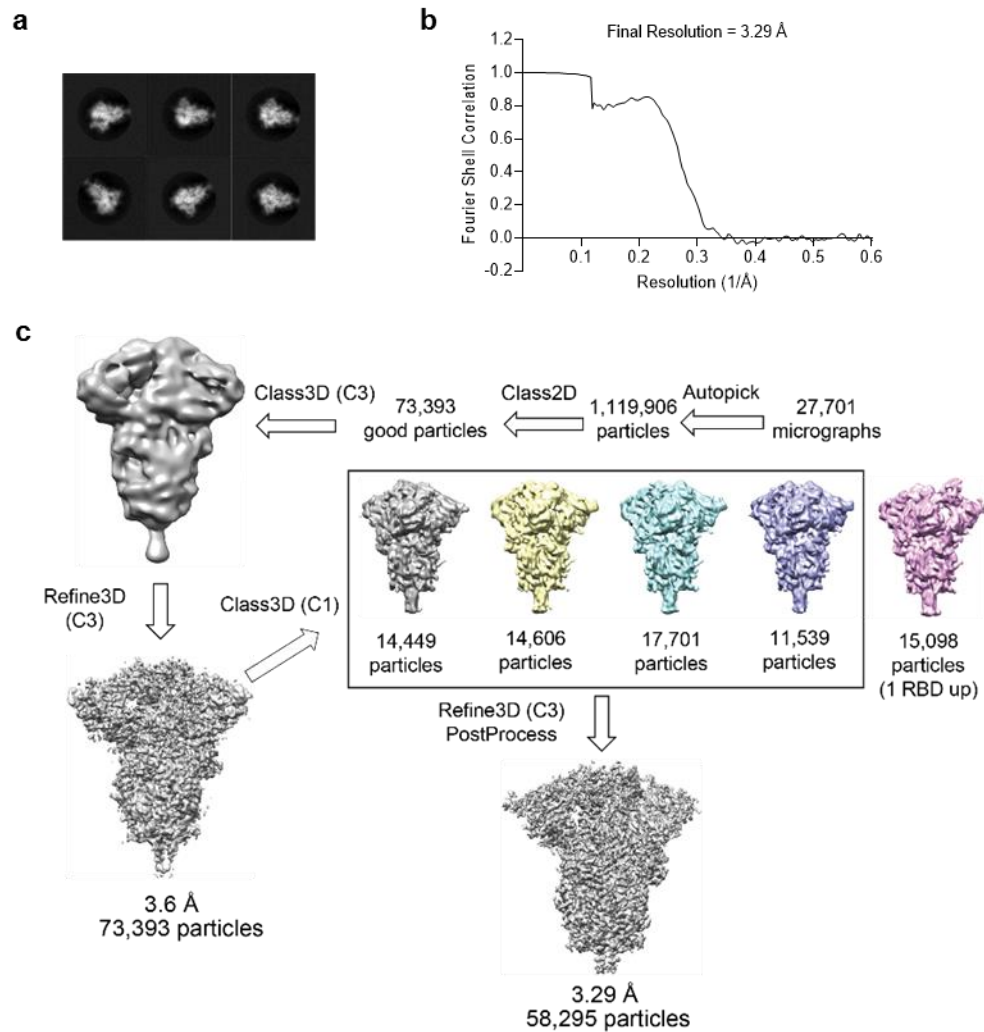

1192

1193 **Extended Data Figure 2. Cryo-EM evidence for alternative conformers of P2 S.**

1194 **a**, Representative 2D class averages of TwinStrep-tagged P2 S particles extracted from cryo-  
1195 EM micrographs. Box edge: 39.2 nm. **b**, Fourier shell correlation curve from RELION gold-  
1196 standard refinement of the P2 S trimer. **c**, Flowchart for cryo-EM data processing of the  
1197 complex, showing 3D class averages.

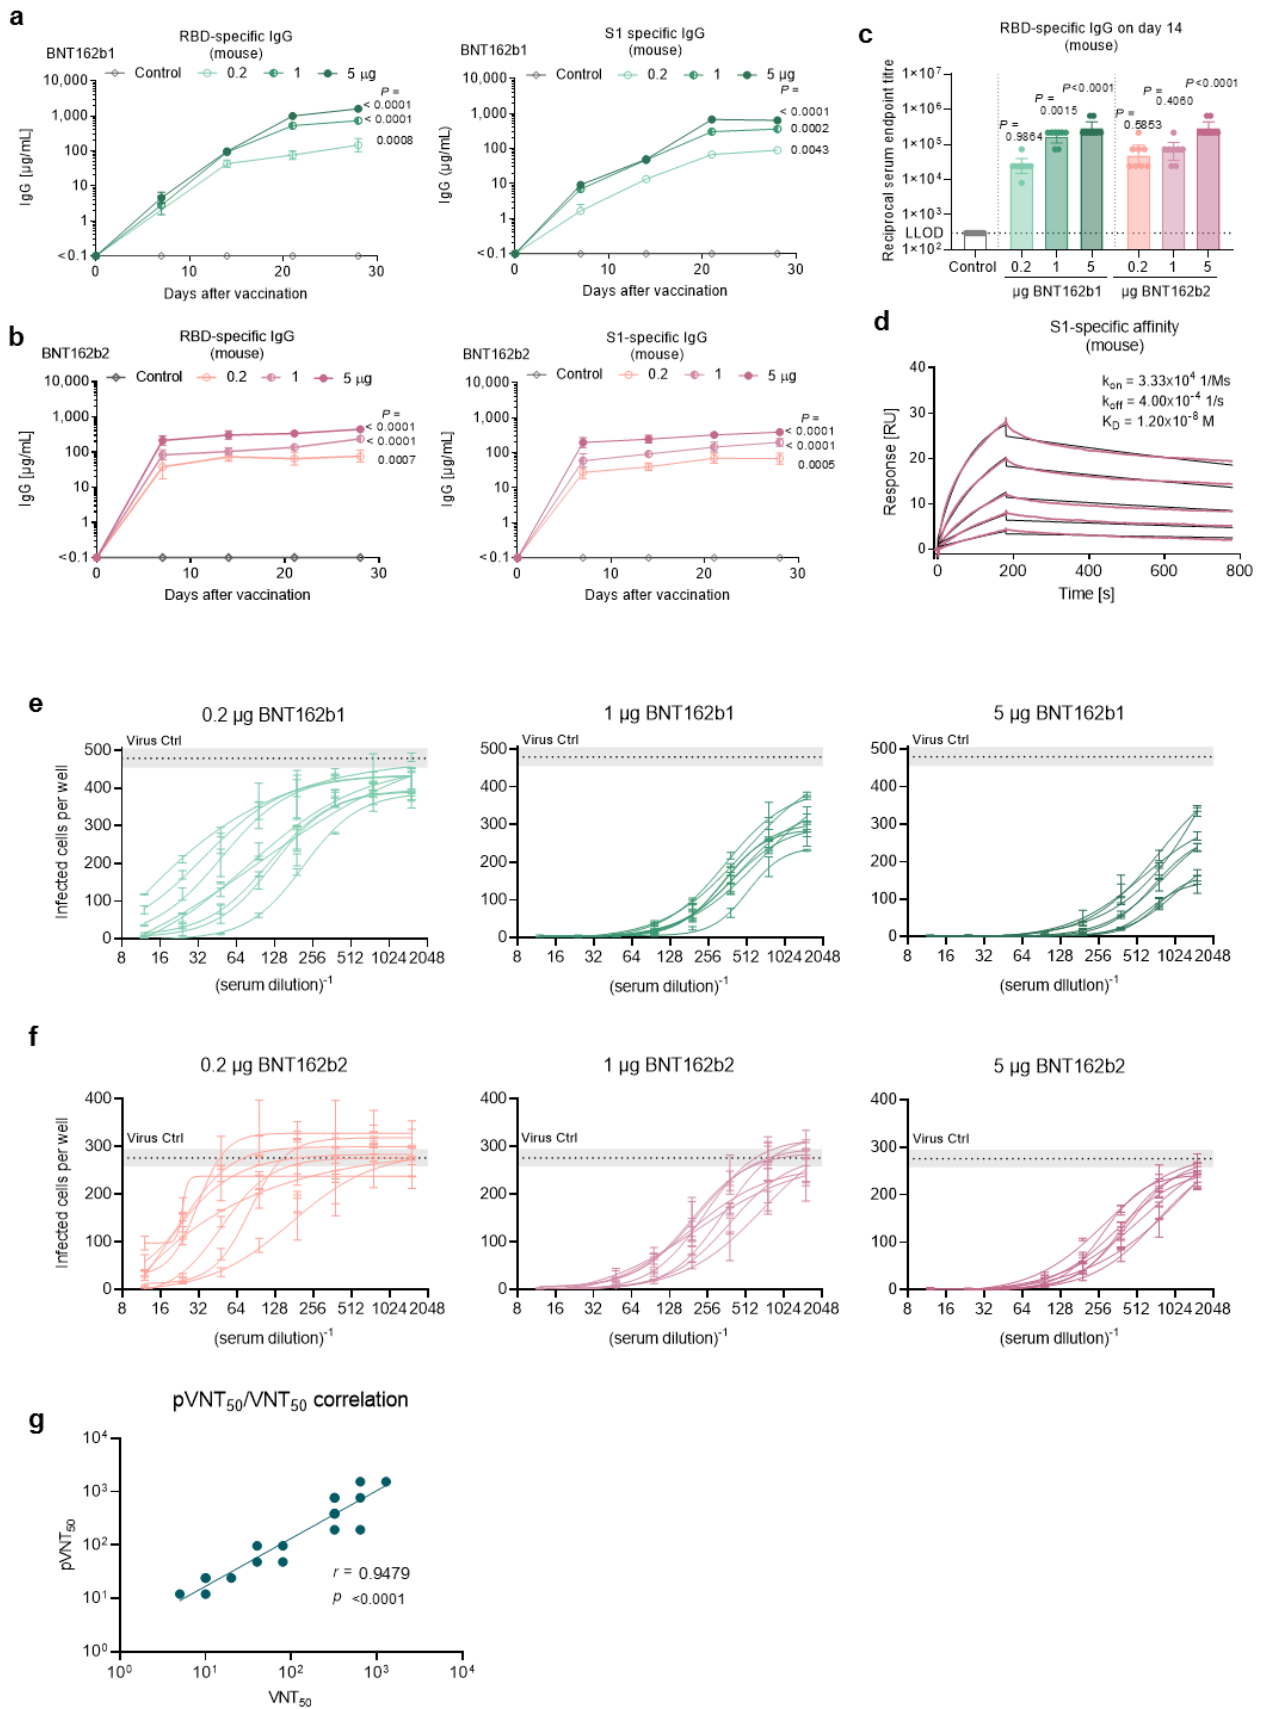

1198

1199

Extended Data Figure 3. BNT162b-elicited antibody responses in mice.



1200 BALB/c mice ( $n=8$ ) were immunised intramuscularly (IM) with a single dose of each BNT162b  
1201 vaccine candidate or buffer (control,  $n=8$ ). Geometric mean of each group (a-c)  $\pm$  95% CI (c),  
1202 Day 28 p-values compared to control (multiple comparison of mixed-effect analysis [**a**, **b**] and  
1203 one-way ANOVA [**c**], all using Dunnett's multiple comparisons test) are provided. **a**, **b**, RBD-  
1204 and S1-specific IgG responses in sera obtained 7, 14, 21 and 28 days after immunisation with  
1205 BNT162b1 (**a**) or BNT162b2 (**b**), determined by ELISA. For day 0 values, a pre-screening of  
1206 randomly selected mice was performed ( $n=4$ ). **c**, Reciprocal serum endpoint titres of RBD-  
1207 specific IgG 14 days after immunisation. The horizontal dotted line indicates the lower limit of  
1208 detection (LLOD). **d**, Representative surface plasmon resonance sensorgram of the binding  
1209 kinetics of His-tagged S1 to immobilised mouse IgG from serum drawn 28 days after  
1210 immunisation with 5  $\mu$ g BNT162b2. Binding data (in colour) and 1:1 binding model fit to the  
1211 data (black) are depicted. **e**, **f**, Number of infected cells per well in a pseudovirus-based VSV-  
1212 SARS-CoV-2 50% neutralisation assay conducted with serial dilutions of mouse serum samples  
1213 drawn 28 days after immunisation with BNT162b1 (**e**) or BNT162b2 (**f**). Lines represent  
1214 individual sera. Horizontal dotted lines indicate geometric mean  $\pm$  95% CI (as grey area) of  
1215 infected cells in the absence of mouse serum (virus positive control). **g**, Pearson correlation of  
1216 pseudovirus-based VSV-SARS-CoV-2 50% neutralisation titres with live SARS-CoV-2 virus  
1217 neutralisation titres for  $n = 10$  random selected serum samples from mice immunised with  
1218 BNT162b1 and BNT162b2 each.

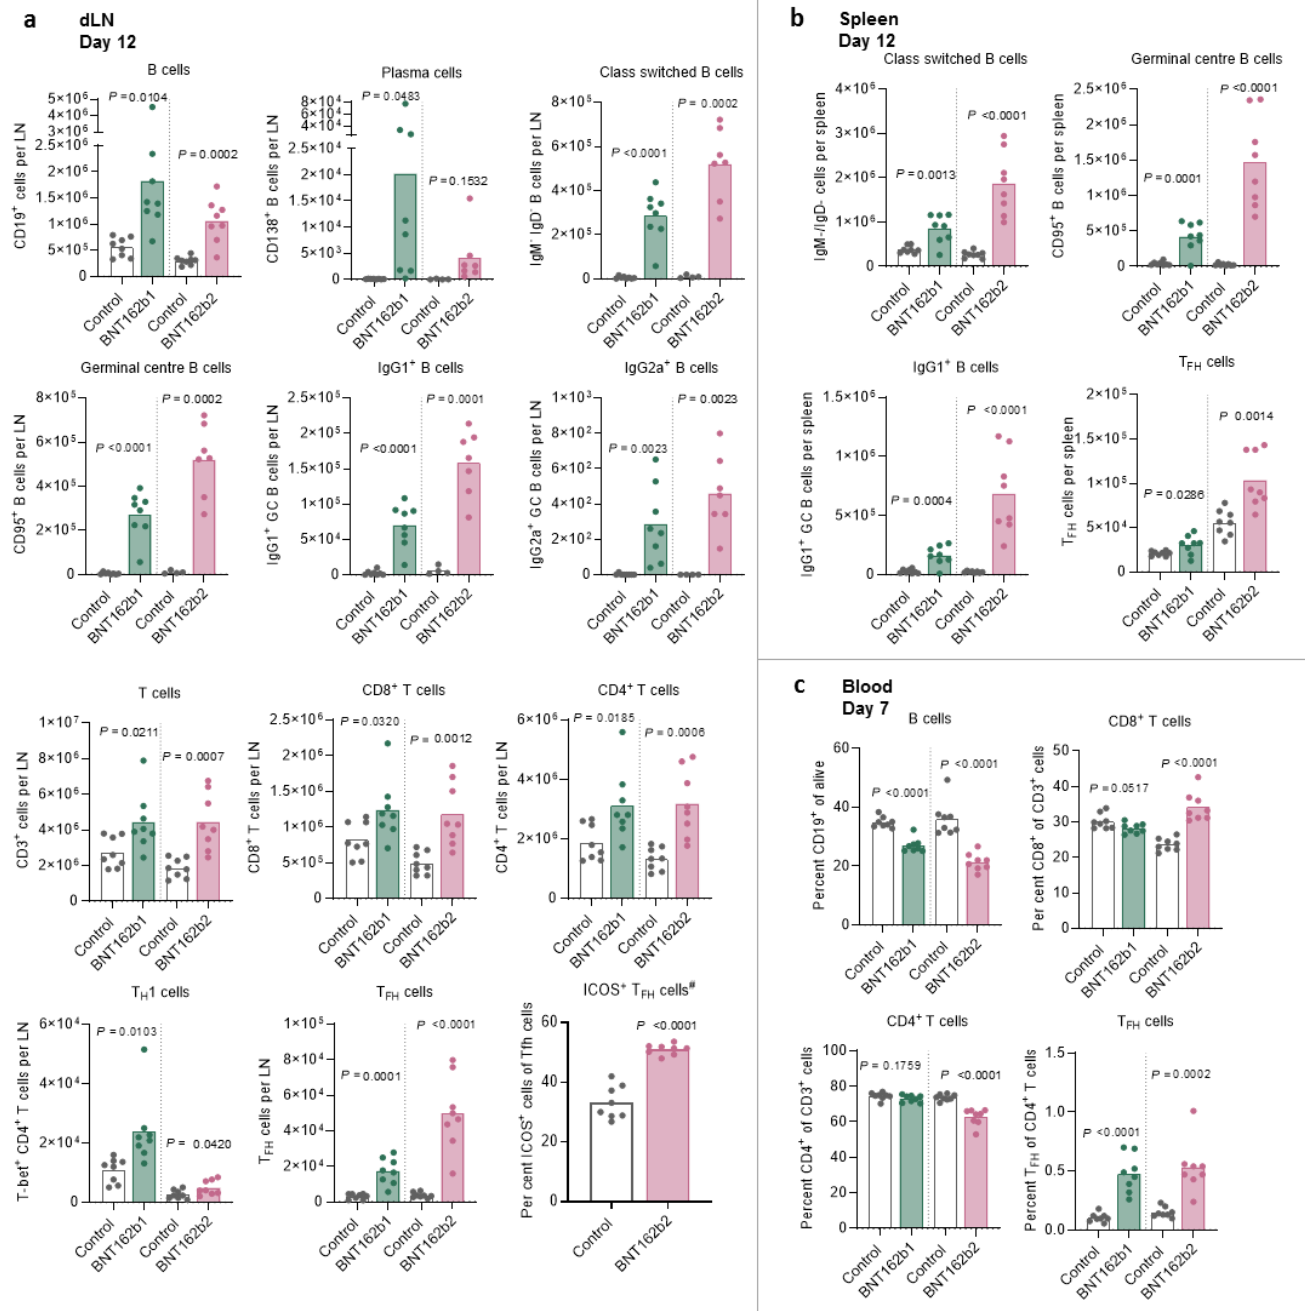

1219

1220 **Extended Data Figure 4. B-cell and T-cell phenotyping in lymphoid compartments of**  
 1221 **BNT162b vaccine immunised mice.**

1222 BALB/C mice ( $n=8$  per group) were immunised with 5  $\mu\text{g}$  of each BNT162b vaccines or buffer  
 1223 (control). Cell subset composition was determined by flow cytometry. P-values were  
 1224 determined by a two-tailed unpaired t-test. **a**, B-cell and T-cell numbers in draining lymph  
 1225 nodes (popliteal, iliac and inguinal lymph nodes; dLN) (for B-cell subtyping: control,  $n=4$ ,

1226 BNT162b2,  $n=7$ ). For percent ICOS<sup>+</sup> cells of T<sub>FH</sub>, only BNT162b2 data are available. **b**, B-cell  
1227 and T<sub>FH</sub>-cell numbers in the spleen. **c**, B-cell and T-cell numbers in the blood.

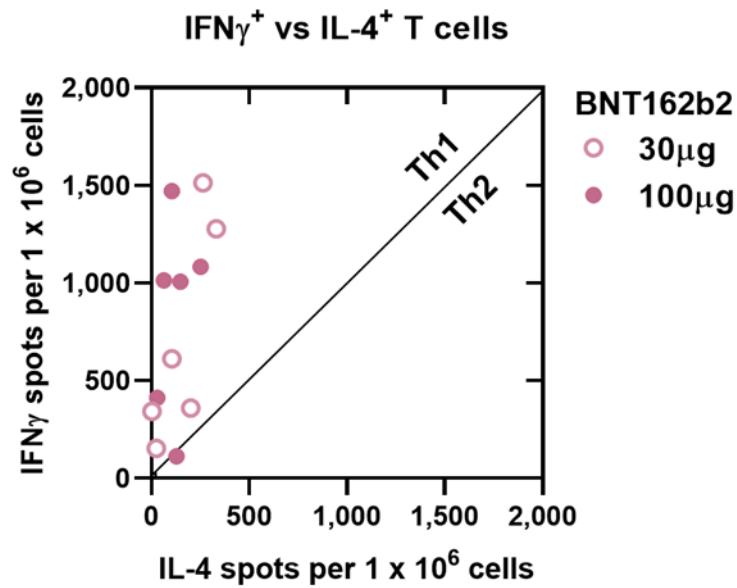

1228

1229 **Extended Data Figure 5. Scatterplot of IL-4 vs. IFN $\gamma$  ELISpot of PBMCs from rhesus**  
1230 **macaques immunised with BNT162b2.**

1231 Rhesus macaques ( $n=6$  per group) were immunised on Days 0 and 21 with 30  $\mu$ g or 100  $\mu$ g  
1232 BNT162b2 as in Figs. 4 and 5. PBMCs for ELISpot were obtained on day 42 and were  
1233 stimulated with a full-length overlapping S peptide pool. Correlation of IL-4 and IFN $\gamma$  spots  
1234 per 1 x 10<sup>6</sup> cells.

### Schedule of rhesus macaque SARS-CoV-2 challenge and necropsy

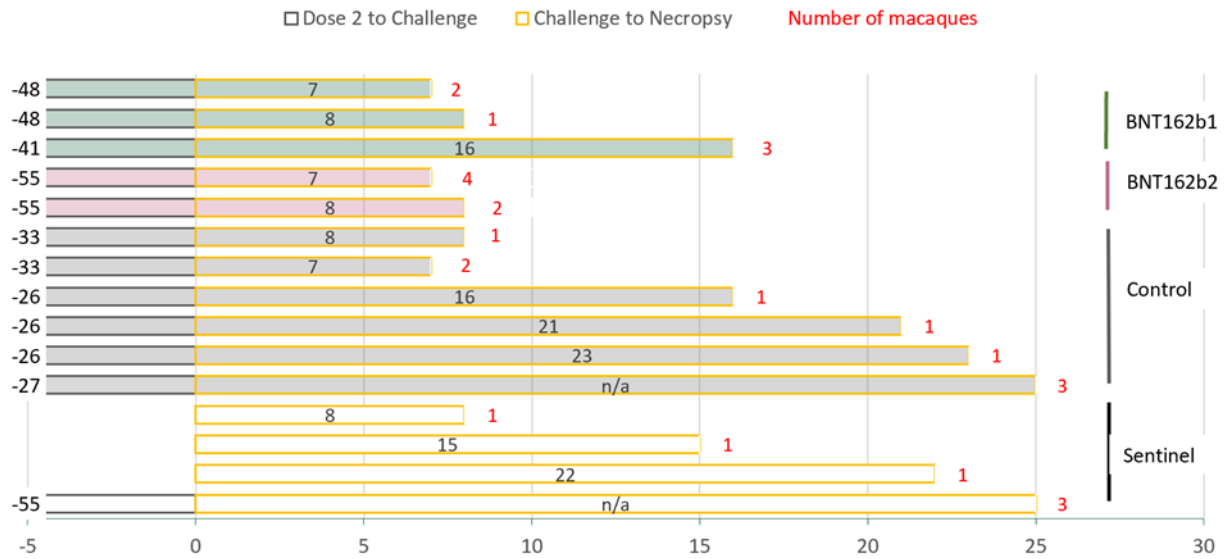

1235

1236 **Extended Data Figure 6. Schedule of rhesus macaque challenge and necropsy.**

1237 Timing in days from Dose 2 of vaccine or saline (numbers to the left of the bars)  
 1238 (numbers inside bars) are presented relative to the day of SARS-CoV-2 or mock challenge (Day  
 1239 0). Numbers of macaques represented by the bars are indicated by red numbers to the right of  
 1240 the bars. Control: macaques challenged but not immunised with BNT162b. Sentinel: macaques  
 1241 mock challenged (cell culture medium only). n/a: macaques not necropsied. Additional details,  
 1242 including timing of sample collections and radiographic examinations, are in Extended Data  
 1243 Table 2.

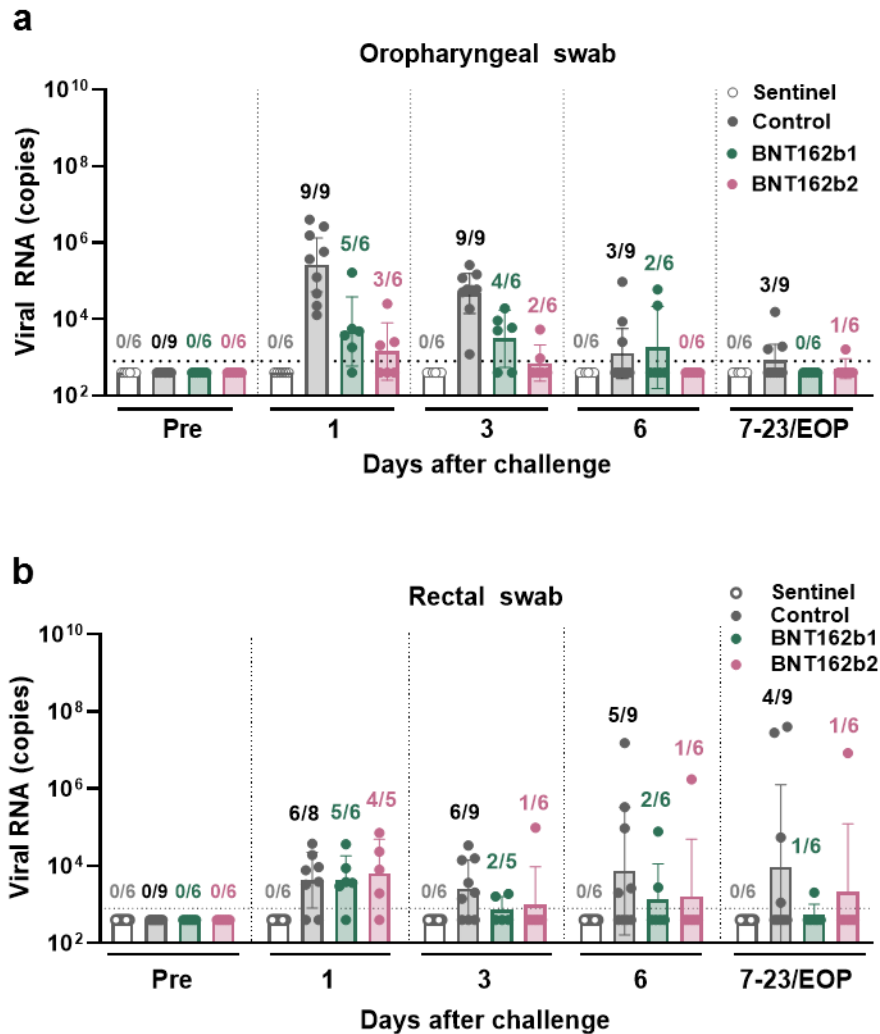

1244

1245 **Extended Data Figure 7. Viral RNA detection in oropharyngeal (OP) and rectal swabs**  
1246 **from rhesus macaques after BNT162b immunisation and challenge with infectious SARS-**  
1247 **CoV-2.**

1248 Rhesus macaques immunised with 100 µg of BNT162b1 or BNT162b2 ( $n=6$  each) and  
1249 macaques immunised with saline or not immunised (Control,  $n=9$ ), as described in Fig. 4,  
1250 Extended Data Fig. 6, and Extended Data Table 2, were challenged with  $1.05 \times 10^6$  total plaque  
1251 forming units (PFU) of SARS-CoV-2 split equally between the intranasal (IN) and intratracheal  
1252 (IT) routes. Additional macaques (sentinel,  $n=6$ ) were mock-challenged with cell culture  
1253 medium. Viral RNA levels were detected by RT-qPCR. **a**, Viral RNA in OP swabs. **b**, Viral  
1254 RNA in rectal swabs. Ratios above data points indicate the number of viral RNA positive  
1255 animals among all animals providing evaluable samples in a group. Heights of bars indicate  
1256 geometric mean of viral RNA copies; whiskers indicate geometric standard deviations. Every

1257 symbol represents one animal. Dotted lines indicate the lower limits of detection (LLODs).  
1258 Values below the LLOD were set to  $\frac{1}{2}$  the LLOD. The statistical significance by Friedman's  
1259 non-parametric test of differences in viral RNA detection between 6 BNT162b1-immunised  
1260 and 6 contemporaneously control-immunised animals (challenge cohorts 1 and 2) after  
1261 challenge was  $p < 0.001$  for OP swabs and  $p = 0.118$  for rectal swabs; between 6 BNT162b2-  
1262 immunised animals and 3 contemporaneously control-immunised animals (challenge cohort 3)  
1263 after challenge, the statistical significance was  $p < 0.001$  for OP swabs and  $p = 0.221$  for rectal  
1264 swabs.



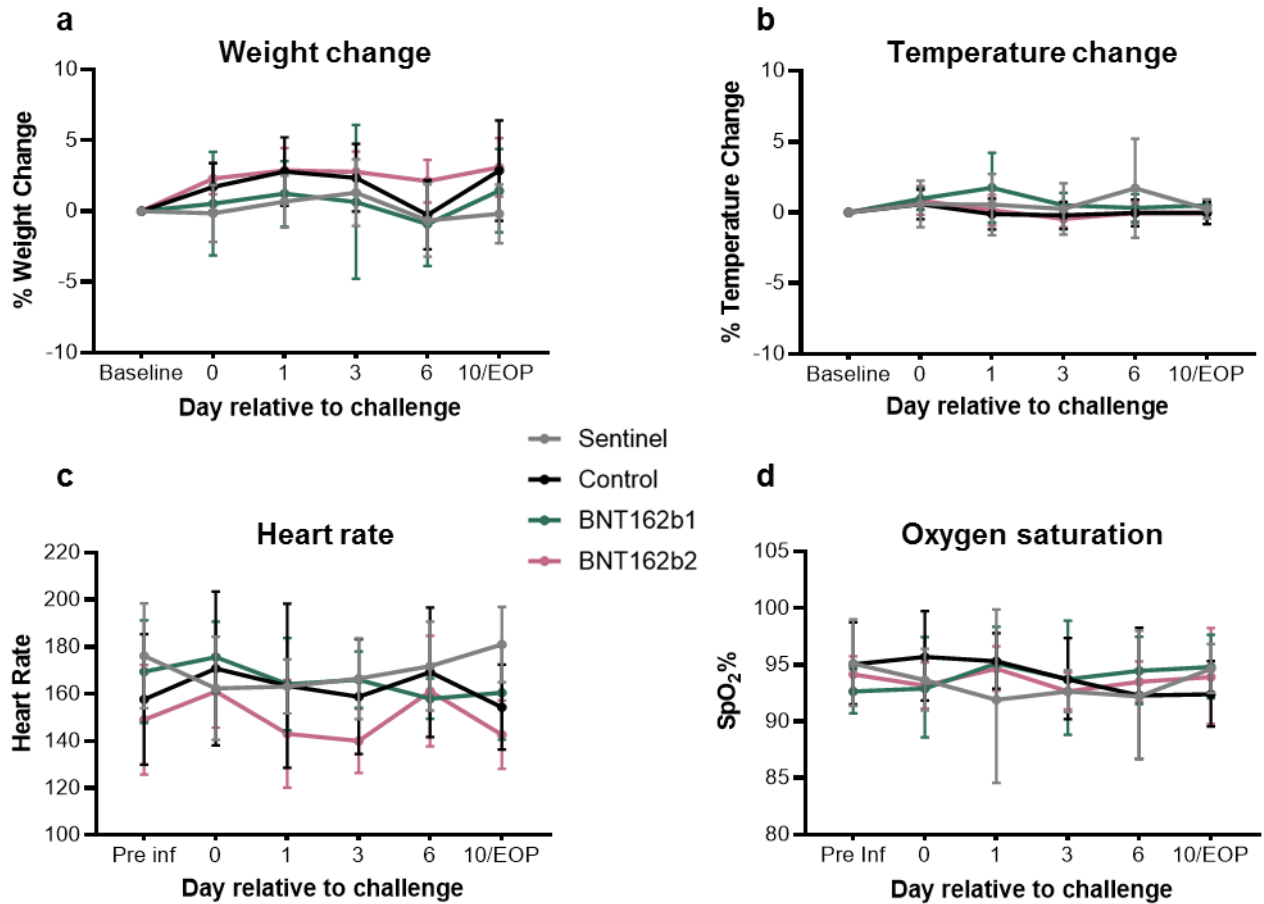

1265

1266 **Extended Data Figure 8. Clinical signs in BNT162b vaccine-immunised rhesus macaques**  
1267 **after challenge with infectious SARS-CoV-2.**

1268 Rhesus macaques were immunised with BNT162b vaccine candidates ( $n=6$  per group) or saline  
1269 (control;  $n=9$ ) and challenged with SARS-CoV-2. A sentinel group was challenged with cell  
1270 culture medium ( $n=6$ ) as described in Figs. 4 and 5 and Extended Data Table 2. Vital signs were  
1271 recorded. **a**, Body weight change. **b**, Temperature change. **c**, Heart rate. **d**, Oxygen saturation.

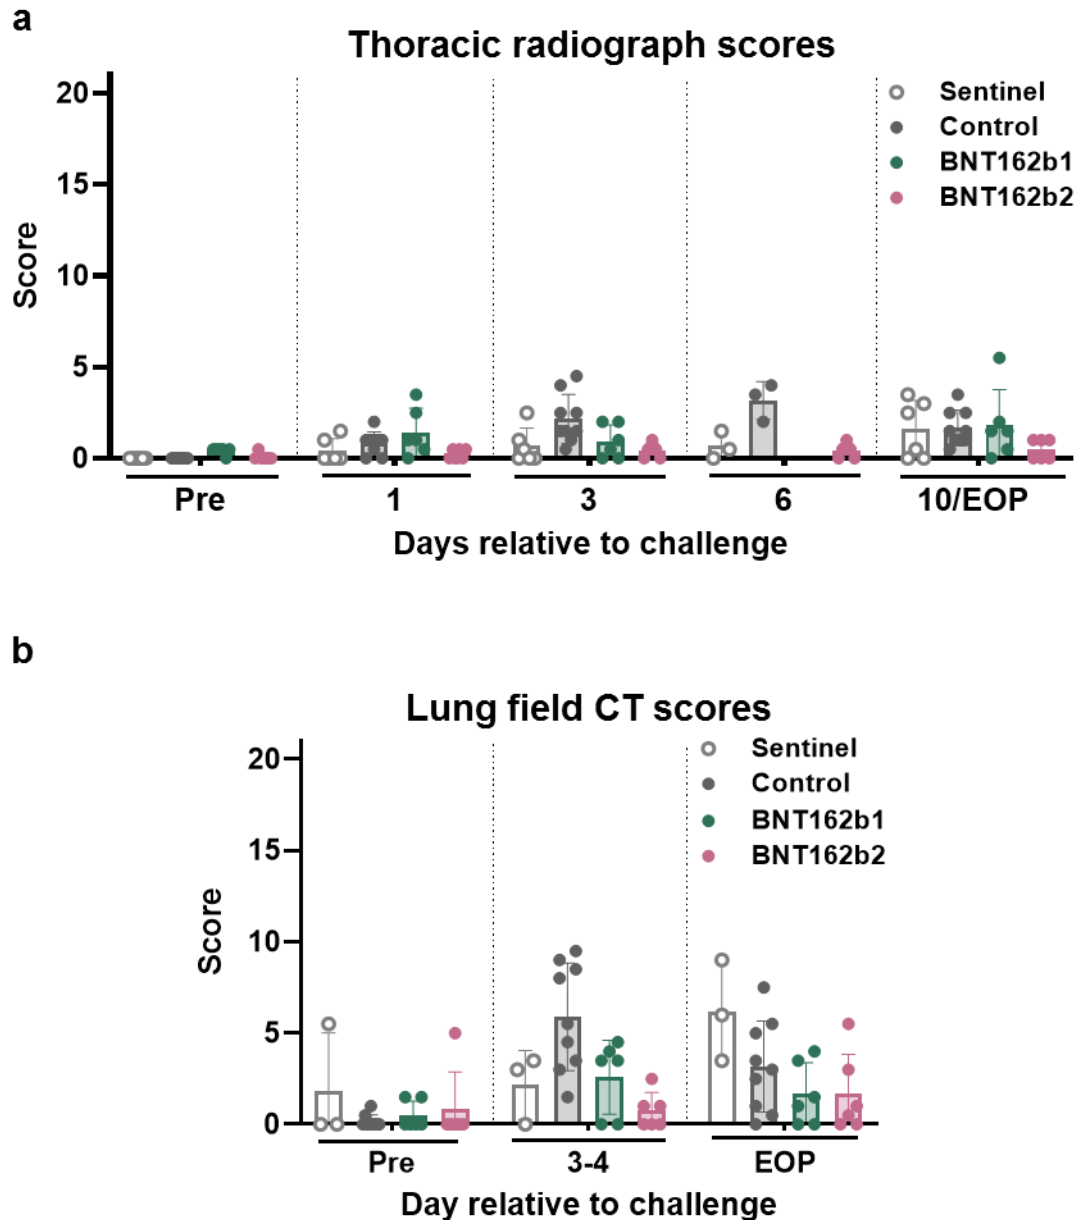

1272

1273 **Extended Data Figure 9. Radiographic signs in rhesus macaques after immunisation with**  
1274 **BNT162b1 or BNT162b2 and challenge with SARS-CoV-2.**

1275 Rhesus macaques were immunised with BNT162b1, BNT162b2, or saline (control) and  
1276 challenged with SARS-CoV-2. A sentinel group was challenged with cell culture medium and  
1277 imaged as described in Figs. 4 and 5 and Extended Data Table 2. Three-view thoracic  
1278 radiographs (ventrodorsal, right and left lateral) and lung field CT images were obtained prior  
1279 to challenge (pre), and post-challenge at the indicated time points. The animals were  
1280 anaesthetised and intubated to perform end inspiratory breath-hold. Images were interpreted by  
1281 two board-certified veterinary radiologists blinded to treatment groups. Scores were assigned

1282 to 7 lung regions on a severity scale of 0-3 per region, with a maximum severity score of 21.  
1283 Pulmonary lesions evident prior to challenge or those which could not be unequivocally  
1284 attributed to the viral challenge (such as atelectasis secondary to recumbency and anesthesia)  
1285 received a score of “0”. **a**, Thoracic radiograph scores. **b**, Lung field CT scores.

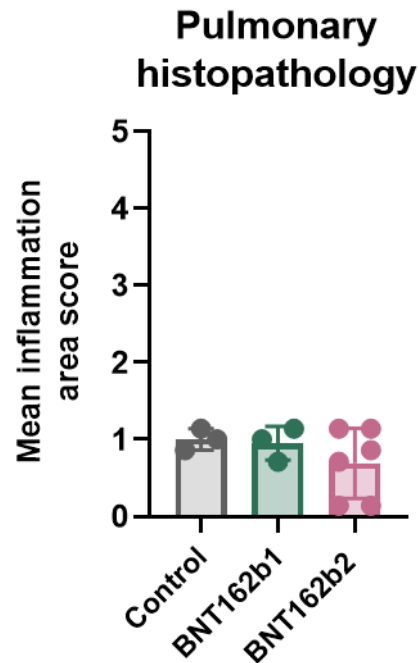

1286

1287 **Extended Data Figure 10. Pulmonary histopathology in rhesus macaques after**  
1288 **immunisation with BNT162b1 or BNT162b2 and challenge with infectious SARS-CoV-2.**

1289 Rhesus macaques were immunised with BNT162b1, BNT162b2, or saline (control) and  
1290 challenged with SARS-CoV-2. A sentinel group was challenged with cell culture medium. The  
1291 macaques were necropsied as described in Figs. 4 and 5 and Extended Data Table 2. Two  
1292 veterinary pathologists blindly performed microscopic evaluation of formalin fixed,  
1293 hematoxylin and eosin stained lung tissue sections from each of 7 lobes from each macaque  
1294 that had been necropsied on Day 7 or 8. Inflammation scores were assigned by consensus  
1295 between the pathologists on a scale of 1-5 based on the area of involvement. Each dot represents  
1296 an individual animal and is the mean inflammation area score from the 7 lung lobes.

1297 **Extended Data Table 1. Cryo-EM data collection, 3D reconstruction and refinement**  
 1298 **statistics.**

**Cryo-electron microscopy data collection, 3D reconstruction and refinement statistics**

| <b>Data collection</b>                          | <b>ACE2/B<sup>0</sup>AT1/RBD complex</b> |                         | <b>P2 S</b>   |               |
|-------------------------------------------------|------------------------------------------|-------------------------|---------------|---------------|
| Electron microscopy equipment                   | Titan Krios (Thermo Fisher Scientific)   |                         |               |               |
| Voltage (keV)                                   | 300                                      |                         |               |               |
| Detector                                        | K2 Summit                                |                         |               |               |
| Energy filter                                   | Gatan GIF, 20 eV slit                    |                         |               |               |
| Nominal magnification                           | 165,000 x                                |                         |               |               |
| Pixel size (Å)                                  | 0.435 (super-resolution)                 |                         |               |               |
|                                                 |                                          |                         | <b>Grid 1</b> | <b>Grid 2</b> |
| Electron dose (e <sup>-</sup> /Å <sup>2</sup> ) | 52.06                                    |                         | 50.32         | 50.12         |
| Dose rate (e <sup>-</sup> /Å <sup>2</sup> /sec) | 8.7                                      |                         | 8.4           | 8.33          |
| Defocus range (µm)                              | -1.2 to -3.4                             |                         | -1.2 to -3.4  | -1.2 to -3.4  |
| Number of collected micrographs                 | 7455                                     |                         | 10,422        | 17,279        |
| Number of selected micrographs                  | 7372                                     |                         | 27701         |               |
| <b>3D reconstruction</b>                        |                                          |                         |               |               |
|                                                 | <b>ACE2/B<sup>0</sup>AT1/RBD</b>         | <b>ACE2/RBD focused</b> |               |               |
| Software                                        | Relion                                   | Relion                  | Warp, Relion  |               |
| Number of used particles                        | 74,784                                   | 74,784                  | 58,295        |               |
| Symmetry imposed                                | C2                                       | C2                      | C3            |               |
| Global resolution (Å)                           |                                          |                         |               |               |
| Fourier shell correlation=0.143                 | 3.73                                     | 3.24                    | 3.29          |               |
| Applied B factor (Å <sup>2</sup> )              | -100                                     | -79.8                   | -50           |               |
| <b>Refinement</b>                               |                                          |                         |               |               |
| Software                                        | Phenix, Coot                             |                         | Phenix, Coot  |               |
| Protein residues                                | 1,788                                    |                         | 2,919         |               |
| Map correlation coefficient                     | 0.86                                     |                         | 0.82          |               |
| Root mean square deviation                      |                                          |                         |               |               |
| Bond length (Å)                                 | 0.005                                    |                         | 0.011         |               |
| Bond angles (°)                                 | 1.021                                    |                         | 0.962         |               |
| Ramachandran plot statistics (%):               |                                          |                         |               |               |
| Preferred                                       | 91.7                                     |                         | 90.4          |               |
| Allowed                                         | 8.3                                      |                         | 9.59          |               |
| Outlier                                         | 0                                        |                         | 0             |               |
| Poor rotamers (%)                               | 0.25                                     |                         | 11.06         |               |
| MolProbity score                                | 1.88                                     |                         | 2.96          |               |
| EMRinger score                                  | 2.76                                     |                         | 2.23          |               |
| Clashscore (all atoms)                          | 6.98                                     |                         | 13.23         |               |

1299

1300 **Extended Data Table 2. Schedule of rhesus macaque immunisation, challenge, sample**  
 1301 **collection, radiologic examination, and necropsy**

**Schedule of rhesus macaque immunization, challenge, sample collection, radiologic examination, and necropsy**

| Challenge group <sup>1</sup> | Immunization <sup>2</sup> | DOB       | Serum collection relative to immunization | Pre challenge serum collection (week after Dose 1) | Challenge cohort <sup>3</sup> | Days between Dose 2 and challenge (if applicable) <sup>4</sup> | Sample collections relative to challenge |              |          |            |            | Necropsy day (post challenge) |
|------------------------------|---------------------------|-----------|-------------------------------------------|----------------------------------------------------|-------------------------------|----------------------------------------------------------------|------------------------------------------|--------------|----------|------------|------------|-------------------------------|
|                              |                           |           |                                           |                                                    |                               |                                                                | Nasal, oral, rectal swab                 | Chest X-ray  | Chest CT | BAL        | Serum      |                               |
| BNT162b1                     | BNT162b1 100 µg           | 5/3/2017  | Pre, 6h, 24h, W1, 2, 3, 4, 5, 6           | 8                                                  | 2                             | 48                                                             | pre/1/3/6/7                              | pre/1/3/7    | pre/3/7  | pre/3/6/7  | pre/3/6/7  | 7                             |
| BNT162b1                     | BNT162b1 100 µg           | 5/20/2016 | Pre, 6h, 24h, W1, 2, 3, 4, 5, 6           | 8                                                  | 2                             | 48                                                             | pre/1/3/6/7                              | pre/1/3/7    | pre/3/7  | pre/3/6/7  | pre/3/6/7  | 7                             |
| BNT162b1                     | BNT162b1 100 µg           | 5/20/2016 | Pre, 6h, 24h, W1, 2, 3, 4, 5, 6           | 8                                                  | 2                             | 48                                                             | pre/1/3/6/8                              | pre/1/3/8    | pre/3/8  | pre/3/6/8  | pre/3/6/8  | 8                             |
| BNT162b1                     | BNT162b1 100 µg           | 5/17/2016 | Pre, 6h, 24h, W1, 2, 3, 4, 5, 6           | 8                                                  | 1                             | 41                                                             | pre/1/3/6/9/16                           | pre/1/3/16   | pre/3/16 | pre/3/6/16 | pre/3/6/16 | 16                            |
| BNT162b1                     | BNT162b1 100 µg           | 5/17/2016 | Pre, 6h, 24h, W1, 2, 3, 4, 5, 6           | 8                                                  | 1                             | 41                                                             | pre/1/3/6/9/16                           | pre/1/3/16   | pre/3/16 | pre/3/6/16 | pre/3/6/16 | 16                            |
| BNT162b1                     | BNT162b1 100 µg           | 5/6/2016  | Pre, 6h, 24h, W1, 2, 3, 4, 5, 6           | 8                                                  | 1                             | 41                                                             | pre/1/3/6/9/16                           | pre/1/3/16   | pre/3/16 | pre/3/6/16 | pre/3/6/16 | 16                            |
| BNT162b2                     | BNT162b2 100 µg           | 5/19/2017 | Pre, 6h, 24h, W1, 2, 3, 4, 5, 6, 8        | 10                                                 | 3                             | 55                                                             | pre/1/3/6/7                              | pre/1/3/6/7  | pre/3/7  | pre/3/6/7  | pre/3/6/7  | 7                             |
| BNT162b2                     | BNT162b2 100 µg           | 5/19/2017 | Pre, 6h, 24h, W1, 2, 3, 4, 5, 6, 8        | 10                                                 | 3                             | 55                                                             | pre/1/3/6/7                              | pre/1/3/6/7  | pre/3/7  | pre/3/6/7  | pre/3/6/7  | 7                             |
| BNT162b2                     | BNT162b2 100 µg           | 6/1/2017  | Pre, 6h, 24h, W1, 2, 3, 4, 5, 6, 8        | 10                                                 | 3                             | 55                                                             | pre/1/3/6/7                              | pre/1/3/6/7  | pre/3/7  | pre/3/6/7  | pre/3/6/7  | 7                             |
| BNT162b2                     | BNT162b2 100 µg           | 6/14/2017 | Pre, 6h, 24h, W1, 2, 3, 4, 5, 6, 8        | 10                                                 | 3                             | 55                                                             | pre/1/3/6/7                              | pre/1/3/6/7  | pre/3/7  | pre/3/6/7  | pre/3/6/7  | 7                             |
| BNT162b2                     | BNT162b2 100 µg           | 5/18/2017 | Pre, 6h, 24h, W1, 2, 3, 4, 5, 6, 8        | 10                                                 | 3                             | 55                                                             | pre/1/3/6/8                              | pre/1/3/6/8  | pre/3/8  | pre/3/6/8  | pre/3/6/8  | 8                             |
| BNT162b2                     | BNT162b2 100 µg           | 5/19/2017 | Pre, 6h, 24h, W1, 2, 3, 4, 5, 6, 8        | 10                                                 | 3                             | 55                                                             | pre/1/3/6/8                              | pre/1/3/6/8  | pre/3/8  | pre/3/6/8  | pre/3/6/8  | 8                             |
| Control                      | Saline                    | 5/17/2017 | Pre, 6h, 24h, W1, 2, 3, 4, 5, 6           | 8                                                  | 2                             | 33                                                             | pre/1/3/4/6/7                            | pre/1/3/4/7  | pre/4/7  | pre/3/6/7  | pre/3/6/7  | 7                             |
| Control                      | Saline                    | 4/19/2017 | Pre, 6h, 24h, W1, 2, 3, 4, 5, 6           | 8                                                  | 2                             | 33                                                             | pre/1/3/4/6/7                            | pre/1/3/4/7  | pre/4/7  | pre/3/6/7  | pre/3/6/7  | 7                             |
| Control                      | Saline                    | 7/12/2016 | Pre, 6h, 24h, W1, 2, 3, 4, 5, 6           | 8                                                  | 2                             | 33                                                             | pre/1/3/6/8                              | pre/1/3/8    | pre/3/8  | pre/3/6/8  | pre/3/6/8  | 8                             |
| Control                      | Saline                    | 5/20/2016 | Pre, 6h, 24h, W1, 2, 3, 4, 5, 6           | 8                                                  | 1                             | 26                                                             | pre/1/3/6/9/16                           | pre/1/3/16   | pre/3/16 | pre/3/6/16 | pre/3/6/16 | 16                            |
| Control                      | Saline                    | 3/30/2016 | Pre, 6h, 24h, W1, 2, 3, 4, 5, 6           | 8                                                  | 1                             | 26                                                             | pre/1/3/6/9/21                           | pre/1/3/21   | pre/3/21 | pre/3/6/21 | pre/3/6/21 | 21                            |
| Control                      | Saline                    | 6/7/2016  | Pre, 6h, 24h, W1, 2, 3, 4, 5, 6           | 8                                                  | 1                             | 26                                                             | pre/1/3/6/9/23                           | pre/1/3/23   | pre/3/23 | pre/3/6/23 | pre/3/6/23 | 23                            |
| Control                      | Saline                    | 5/22/2017 | Pre, 6h, 24h, W1, 2, 3                    | 6                                                  | 3                             | 27                                                             | pre/1/3/6/10                             | pre/1/3/6/10 | pre/3/10 | pre/3/6    | pre/3/6/10 | not necropsied                |
| Control                      | Saline                    | 6/12/2017 | Pre, 6h, 24h, W1, 2, 3                    | 6                                                  | 3                             | 27                                                             | pre/1/3/6/10                             | pre/1/3/6/10 | pre/3/10 | pre/3/6    | pre/3/6/10 |                               |
| Control                      | Saline                    | 5/29/2017 | Pre, 6h, 24h, W1, 2, 3                    | 6                                                  | 3                             | 27                                                             | pre/1/3/6/10                             | pre/1/3/6/10 | pre/3/10 | pre/3/6    | pre/3/6/10 |                               |
| Sentinel                     | -                         | 3/27/2016 | -                                         | -                                                  | 2                             | -                                                              | pre/1/3/4/6/8                            | pre/1/3/4/8  | pre/4/8  | pre/3/6/8  | pre/3/6/8  | 8                             |
| Sentinel                     | -                         | 6/5/2017  | -                                         | -                                                  | 1                             | -                                                              | pre/1/3/6/9/15                           | pre/1/3/4/15 | pre/3/15 | pre/3/6/15 | pre/3/6/15 | 15                            |
| Sentinel                     | -                         | 5/30/2017 | -                                         | -                                                  | 1                             | -                                                              | pre/1/3/6/9/22                           | pre/1/3/4/22 | pre/3/22 | pre/3/6/22 | pre/3/6/22 | 22                            |
| Sentinel                     | BNT162b2 30 µg            | 5/18/2017 | Pre, 6h, 24h, W1, 2, 3, 4, 5, 6, 8        | 10                                                 | 3                             | 55                                                             | pre/1/3/6/10                             | pre/1/3/6/10 | 10       | pre/3/6    | pre/3/6/10 | not necropsied                |
| Sentinel                     | BNT162b2 30 µg            | 5/27/2017 | Pre, 6h, 24h, W1, 2, 3, 4, 5, 6, 8        | 10                                                 | 3                             | 55                                                             | pre/1/3/6/10                             | pre/1/3/6/10 | 10       | pre/3/6    | pre/3/6/10 |                               |
| Sentinel                     | BNT162b2 30 µg            | 6/9/2017  | Pre, 6h, 24h, W1, 2, 3, 4, 5, 6, 8        | 10                                                 | 3                             | 55                                                             | pre/1/3/6/10                             | pre/1/3/6/10 | 10       | pre/3/6    | pre/3/6/10 |                               |

<sup>1</sup>All macaques in the BNT162b1, BNT162b2, and control challenge groups were challenged with SARS-CoV-2. Macaques in the sentinel challenge group were mock challenged.

<sup>2</sup>“-” indicates no immunization.

<sup>3</sup>Challenge cohort 2 was challenged with SARS-CoV-2 or mock challenged one week after challenge cohort 1. Challenge cohort 3 was challenged with SARS-CoV-2 or mock challenged 6 weeks after challenge cohort 2.

<sup>4</sup>All macaques were challenged with SARS-CoV-2 or mock challenged, according to their challenge group. The entry for “Days from Dose 2 to SARS-COV-2 or mock challenge” for macaques that were not immunized is “-”.

1302

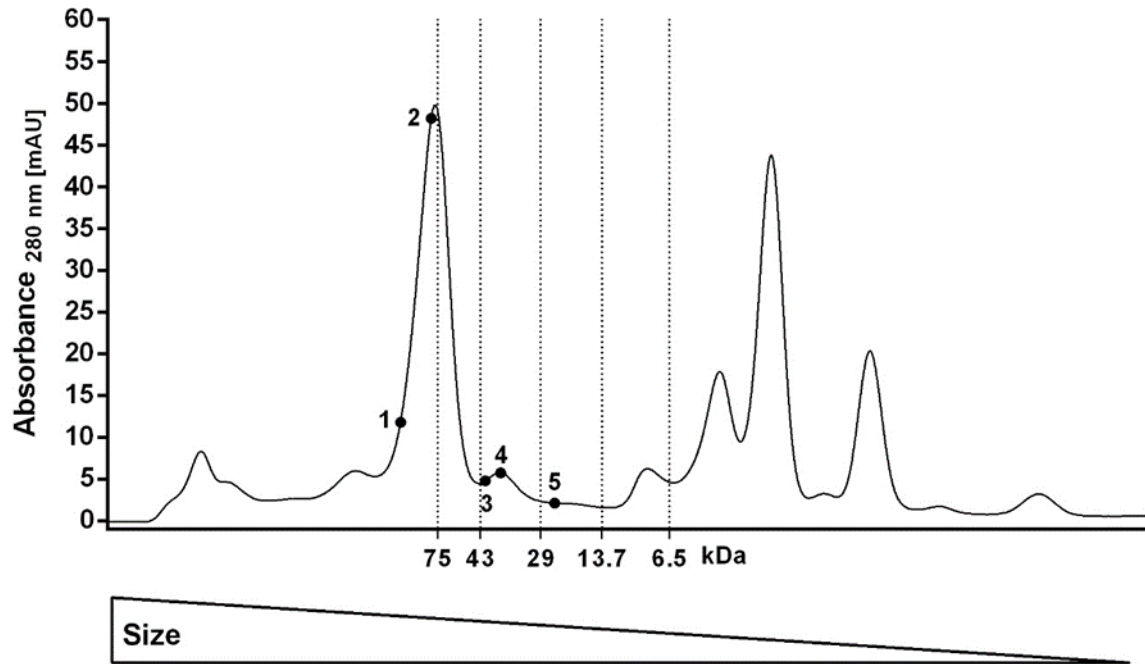

1303

1304 **Supplementary Figure 1. Size exclusion chromatography of medium from BNT162b1**  
1305 **RNA-transfected cells.**

1306 Concentrated medium of HEK293T cells transfected with BNT162b1 RNA formulated with a  
1307 transfection reagent (BNT162b1 RNA) was applied to a size exclusion chromatography  
1308 column, calibrated using protein size standards (75, 43, 29, 13.7 and 6.5 kDa). Numbered dots  
1309 indicate fractions that were further analysed by western blot.



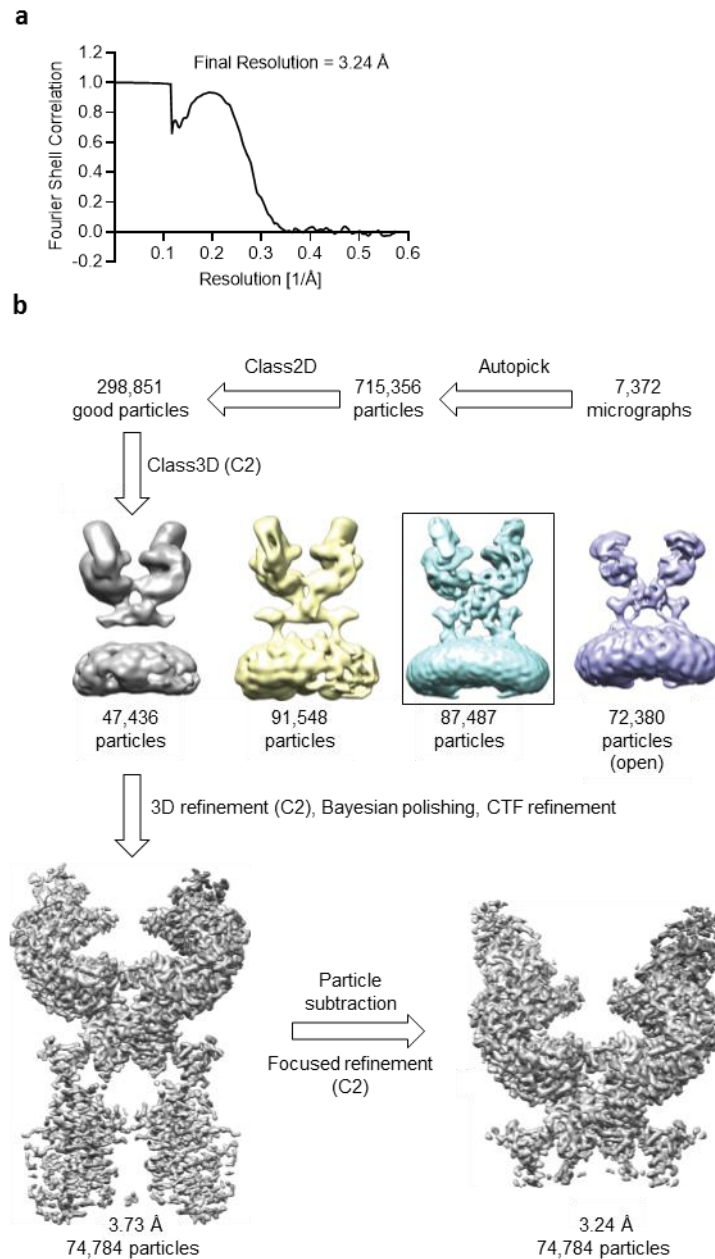

1310

1311 **Supplementary Figure 2. Supporting data for cryo-EM of the trimerised RBD in complex**  
1312 **with receptor.**

1313 **a**, Fourier shell correlation curve from RELION focused gold-standard refinement of the  
1314 ACE2/B<sup>0</sup>AT1/RBD-trimer ternary complex. **b**, Flowchart for cryo-EM data processing of the  
1315 complex. CTF, contrast transfer function. C2 symmetry applied during classification and  
1316 refinement.

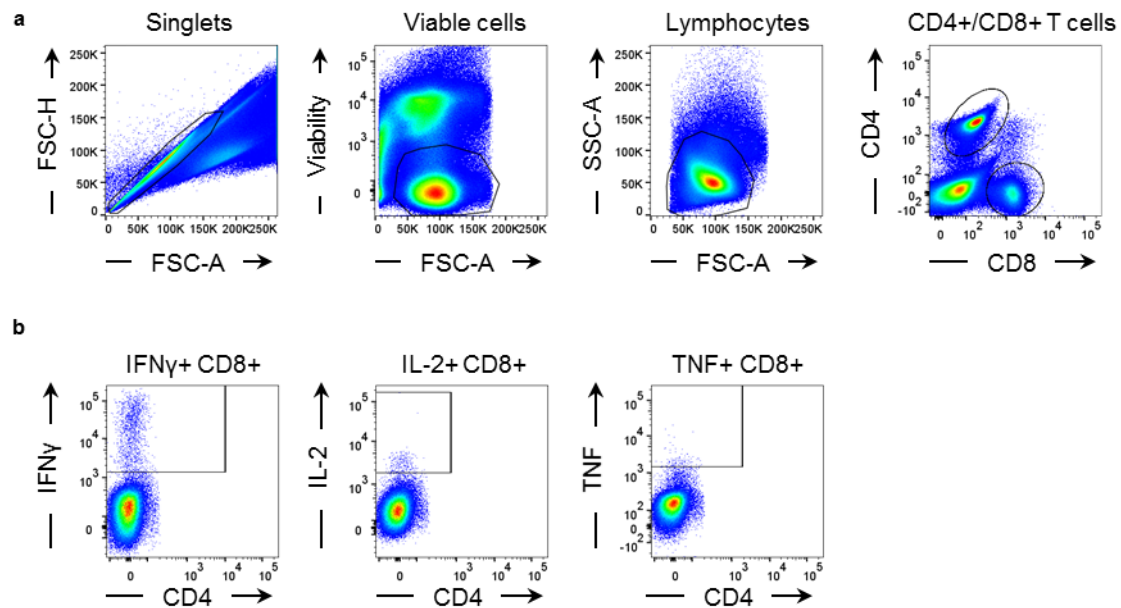

1317

1318 **Supplementary Figure 3. Gating strategy for flow cytometry analysis of mouse data**  
1319 **shown in Figure 3 c.**

1320 Flow cytometry gating strategy for the identification of IFN $\gamma$ , IL-2, and TNF secreting CD8<sup>+</sup> T  
1321 cells in the mouse spleen. **a**, CD8<sup>+</sup> T cells were gated within single, viable lymphocytes. **b**,  
1322 Gating of IFN $\gamma$ , IL-2 and TNF in CD8<sup>+</sup> T cells.

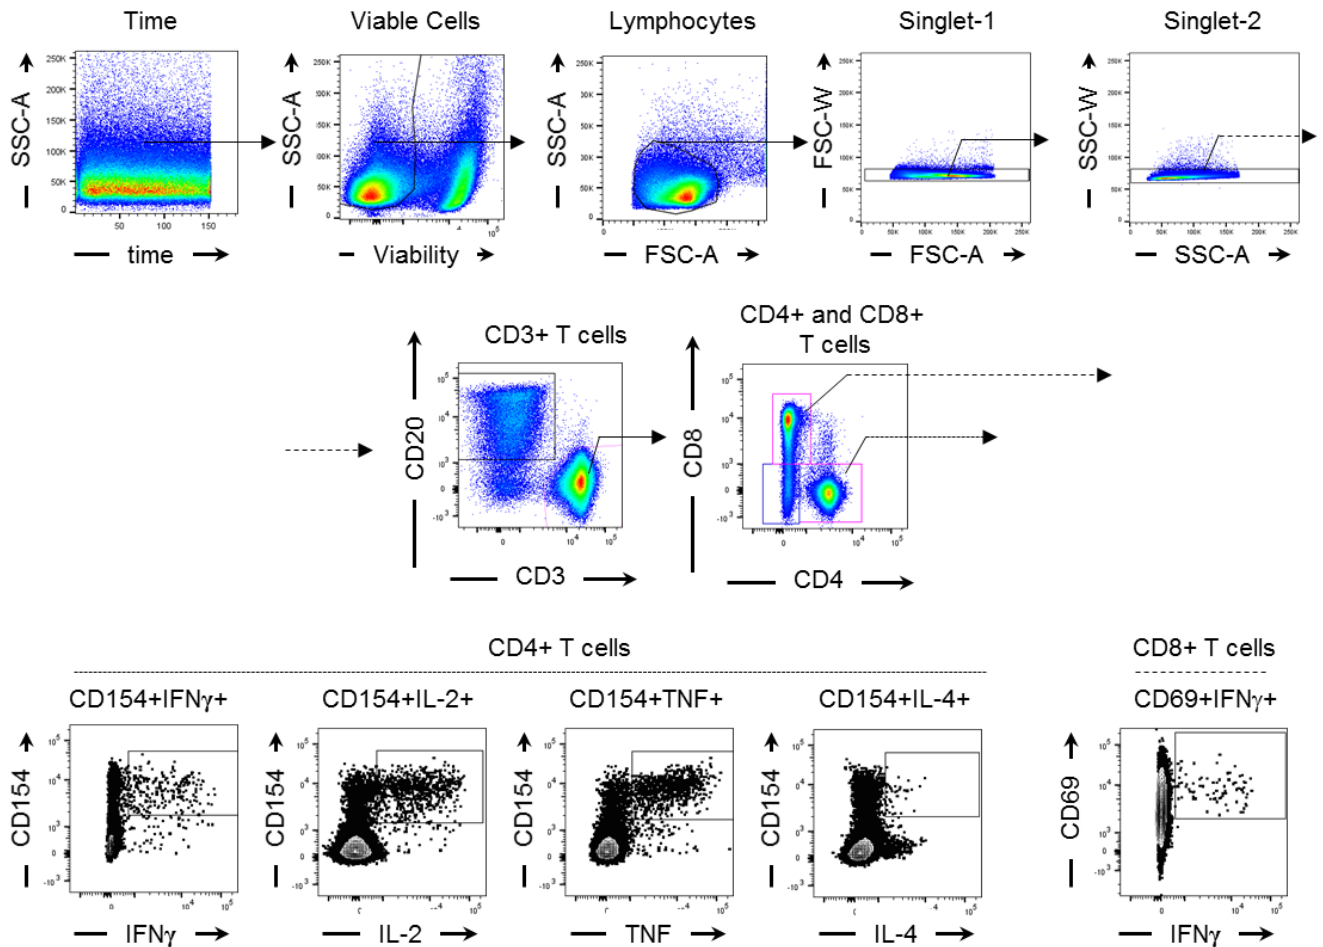

1323

1324 **Supplementary Figure 4. Gating strategy for rhesus macaque flow cytometry analysis**  
 1325 **of data shown in Figure 4 e-g.**

1326 Flow cytometry gating strategy for identification of spike-specific SARS-CoV-2 modRNA  
 1327 vaccine BNT162b2-induced T cells. Starting with events acquired with a constant flow stream  
 1328 and fluorescence intensity, viable cells, lymphocytes and single events were identified and  
 1329 gated (upper row, left to right). Within singlet lymphocytes, CD20<sup>-</sup> CD3<sup>+</sup> T cells were identified  
 1330 and gated into CD4<sup>+</sup> T cells and CD8<sup>+</sup> T cells (middle row). Antigen-specific CD4<sup>+</sup> T cells  
 1331 were identified by gating on CD154 and cytokine-positive cells, and CD8<sup>+</sup> T cells were  
 1332 identified by gating on CD69 and cytokine-positive cells. The antigen-specific cells were used  
 1333 for further analysis (bottom row).

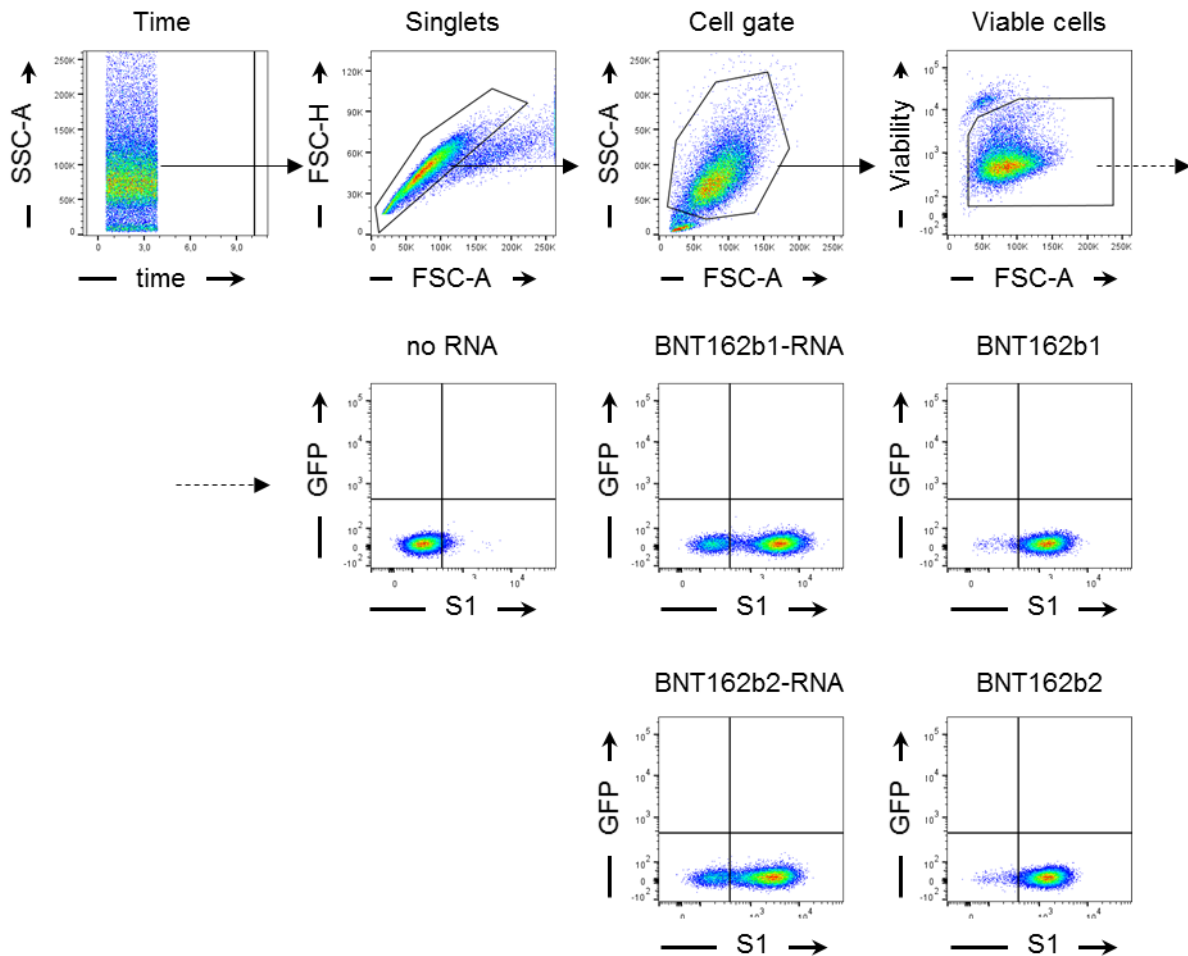

1334

1335 **Supplementary Figure 5. Gating strategy for flow cytometry analysis of data shown in**  
1336 **Extended Data Figure 1a.**

1337 Flow cytometry gating strategy for the identification of HEK293T cells transfected with  
1338 BNT162b1 or BNT162b2, or BNT162b1-RNA or BNT162b2-RNA using a transfection reagent  
1339 or no RNA (control). S1<sup>+</sup> HEK293T cells were gated within single, viable HEK293T cells.

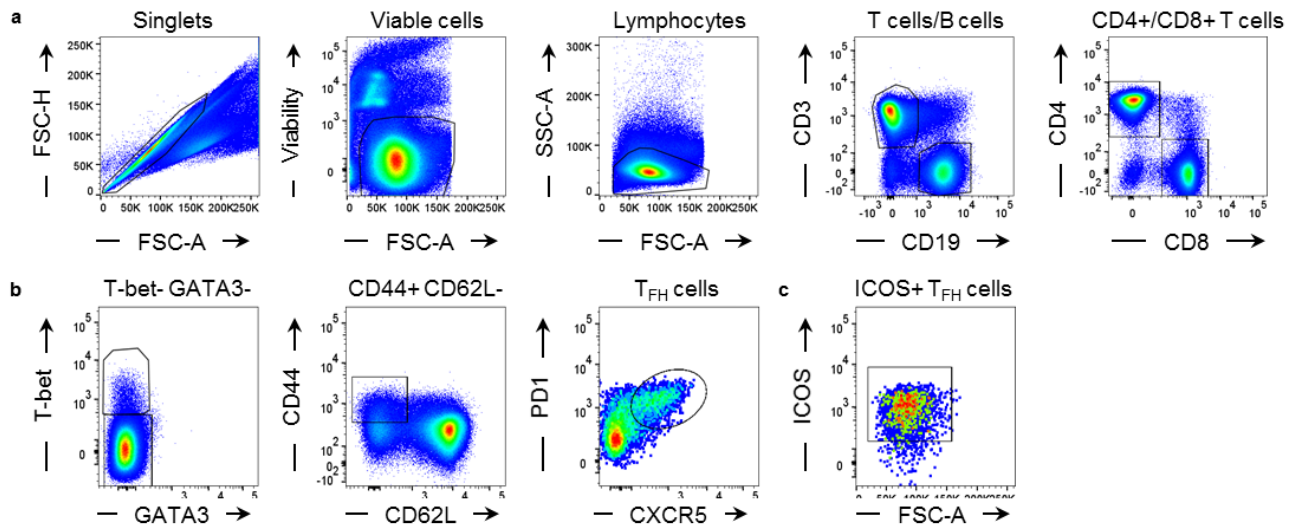

1340

1341 **Supplementary Figure 6. Gating strategy for flow cytometry analysis of T-cell**  
1342 **phenotypes in murine lymph nodes and spleen shown in Extended Data Figure 4a and b.**

1343 Flow cytometry gating strategy for identification of TFH cells, activated T cells and B cells in  
1344 lymph nodes and the spleen. **a**, CD3<sup>+</sup>CD19<sup>-</sup> T cells were gated within single, viable  
1345 lymphocytes. CD4<sup>+</sup> and CD8<sup>+</sup> T cells were gated from CD3<sup>+</sup> cells. **b**, TFH cells were gated from  
1346 CD4<sup>+</sup> T cells and defined as CD4<sup>+</sup> Tbet<sup>-</sup> GATA3<sup>-</sup> CD44<sup>+</sup> CD62L<sup>-</sup> PD-1<sup>+</sup> CXCR5<sup>+</sup> cells.

1347

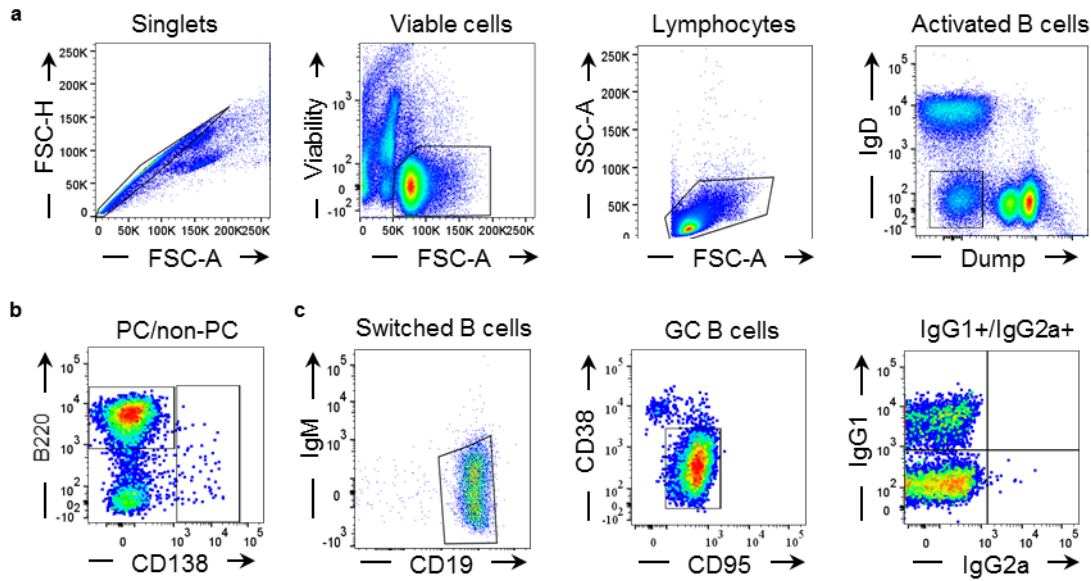

1348

1349 **Supplementary Figure 7. Gating strategy for flow cytometry analysis of B-cell subtypes**  
1350 **in murine lymph nodes and spleen shown in Extended Data Figure 4a and b.**

1351 Flow cytometry gating strategy for the identification of B cells in lymph nodes and the spleen.  
1352 **a**, Activated B cells were gated within single, viable lymphocytes and defined as IgD-Dump  
1353 (CD4, CD8, F4/80, GR-1)<sup>-</sup> cells. **b**, Plasma cells (PC) were gated from activated B cells and  
1354 defined as CD138<sup>+</sup> B220<sup>low/-</sup> cells. **c**, Switched B cells were gated from non-PC and defined as  
1355 CD19<sup>+</sup> CD138<sup>-</sup> IgM<sup>-</sup>. Germinal centre (GC) and IgG1<sup>+</sup> and IgG2a<sup>+</sup> B cells were gated from  
1356 switched B cells and defined as CD19<sup>+</sup> IgM<sup>-</sup> CD38<sup>-</sup> CD95<sup>+</sup> and CD19<sup>+</sup> IgM<sup>-</sup> IgG1<sup>+</sup>/IgG2a<sup>+</sup>,  
1357 respectively.

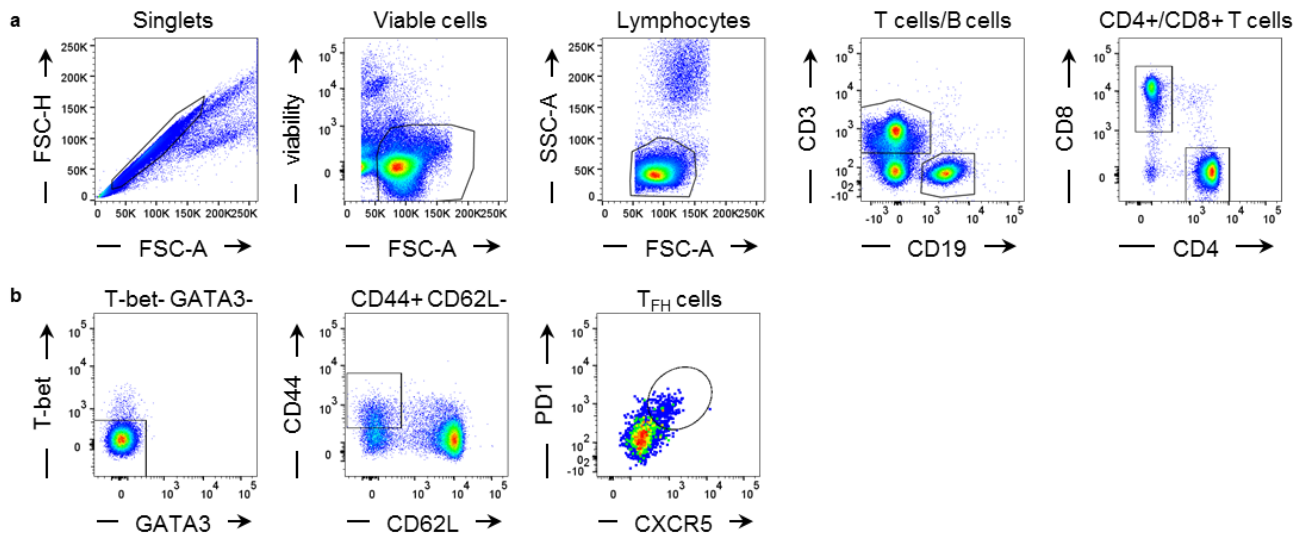

1358

1359 **Supplementary Figure 8. Gating strategy for flow cytometry analysis of T-cell phenotypes**  
1360 **in mouse peripheral blood shown in Extended Data Figure 4c.**

1361 Flow cytometry gating strategy for the identification of T cells, B cells and T<sub>FH</sub> cells in  
1362 peripheral blood. **a**, CD3<sup>+</sup> CD19<sup>-</sup> T cells were gated within single, viable lymphocytes. CD4<sup>+</sup>  
1363 and CD8<sup>+</sup> T cells were gated from CD3<sup>+</sup> CD19<sup>-</sup> cells. **b**, T<sub>FH</sub> cells were gated from CD4<sup>+</sup> T cells  
1364 and defined as CD4<sup>+</sup> T-bet<sup>-</sup> GATA3<sup>-</sup> CD44<sup>+</sup> CD62L<sup>-</sup> PD-1<sup>+</sup> CXCR5<sup>+</sup> cells.
